# Supplementary material for: Simultaneous CO2 capture and functionalization: solvated electron precursors as novel catalysts
Source: Royal Society of Chemistry journal article supplement (doi:10.1039/d1cc04748e), 2021-12-22
Supplement: d1cc04748e1.pdf [file d1cc04748e1.pdf]

# Electronic Supplementary Information

## Simultaneous CO<sub>2</sub> capture and functionalization: solvated electron precursors as novel catalysts

Benjamin A. Jackson and Evangelos Miliordos\*

Department of Chemistry and Biochemistry, Auburn University, Auburn, AL 36849-5312, USA

**Corresponding Author**

\* E-mail: [emiliord@auburn.edu](mailto:emiliord@auburn.edu)

Reactants, intermediates, and transition states for the gas-phase reaction pathways of  $\text{Li(X)}_4 + \text{CO}_2 + 2 \text{H}_2 \rightarrow \text{Li(X)}_4 + \text{CH}_2(\text{OH})_2$  ( $\text{X} = \text{NH}_3, \text{NH}_2\text{CH}_3, \text{NH}_2\text{CH}_2\text{CH}_3, \text{H}_2\text{O}, \text{CH}_3\text{OH}$ ) and  $\text{Li(Y)}_4 + 2 \text{C}_2\text{H}_4 \rightarrow \text{Li(Y)}_4 + \text{C}_5\text{H}_8\text{O}_2$  ( $\text{Y} = \text{NH}_3, \text{NH}_2\text{CH}_3$ ) were optimized under density functional theory using the CAM-B3LYP functional and the cc-pVTZ (C, N, O) and aug-cc-pVTZ (H) basis sets. The task of locating transition states for the formic acid/methyldiol system proved to be one of significant challenge; for select structures alternative methods were employed to aid in their identification. For the eTS1 structure of  $\text{Li}(\text{NH}_2\text{CH}_2\text{CH}_3)_4$  no transition state could be located- this is likely a result of the electron transfer from the SEP to  $\text{CO}_2$  being barrierless due to the trend of decreasing I.E. for more larger ligands. The structure and energy reported was obtained using the eTS1 structure of  $\text{Li}(\text{NH}_2\text{CH}_3)_4$ , adding the additional methane to each ligand, and fixing the atoms of Li and  $\text{CO}_2$  when optimizing. This same process was also used to obtain the eTS2 structure  $\text{Li}(\text{H}_2\text{O})_4$  starting from eTS2 of  $\text{Li}(\text{CH}_3\text{OH})_4$ . For the OHTS2 and eTS1 structures of  $\text{Li}(\text{CH}_3\text{OH})_4$ , these were located at the double- $\zeta$  (DZ) basis set level but could not be located at triple- $\zeta$  (TZ). As such, the energies reported are from single point TZ calculations using the optimized DZ geometry. For all ligands, the transition state CHTS2 could not be located at CAM-B3LYP (DZ or TZ). Instead, CHTS2 was located and optimized at the MP2 double- $\zeta$  level and energies reported are from single point CAM-B3LYP(TZ) calculations at the MP2 geometry. The CAM-B3LYP methodology was benchmarked using the higher level CCSD(T). To ensure these calculations were tractable, the cc-pVDZ (C, N, O) and aug-cc-pVDZ (H) basis sets were used and a correction to triple- $\zeta$  was approximated as  $E^{\text{CCSD(T)}(\text{TZ})} \approx E^{\text{CCSD(T)}(\text{DZ})} + \{E^{\text{MP2}}(\text{TZ}) - E^{\text{MP2}}(\text{DZ})\}$ , where  $E^{\text{CCSD(T)}(\text{DZ})}$  is the single point energy at CCSD(T) double- $\zeta$  basis set while  $E^{\text{MP2}}(\text{TZ})$  and  $E^{\text{MP2}}(\text{DZ})$  are the single point energies at MP2 under triple- $\zeta$  and double- $\zeta$ , respectively.

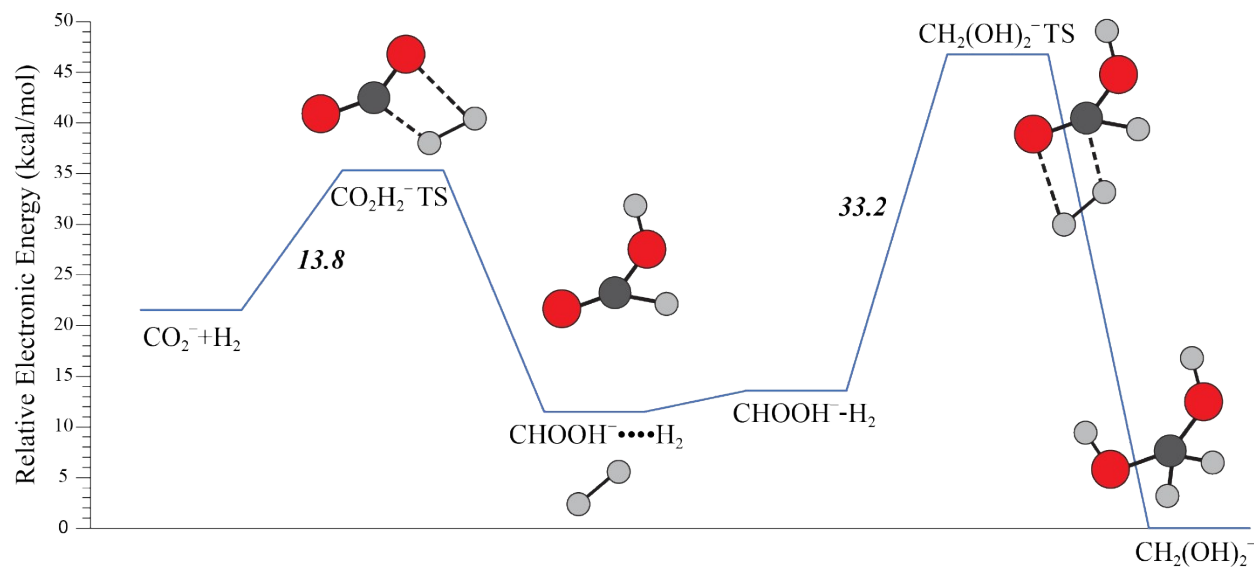

**Figure S1.** Reaction pathway of  $\text{CO}_2^- + 2\text{H}_2 \rightarrow \text{CH}_2(\text{OH})_2^-$ . Structures of transition states and select intermediates are shown. Structures optimized at CAM-B3LYP with basis sets cc-pVTZ (C, O), aug-cc-pVTZ (H).

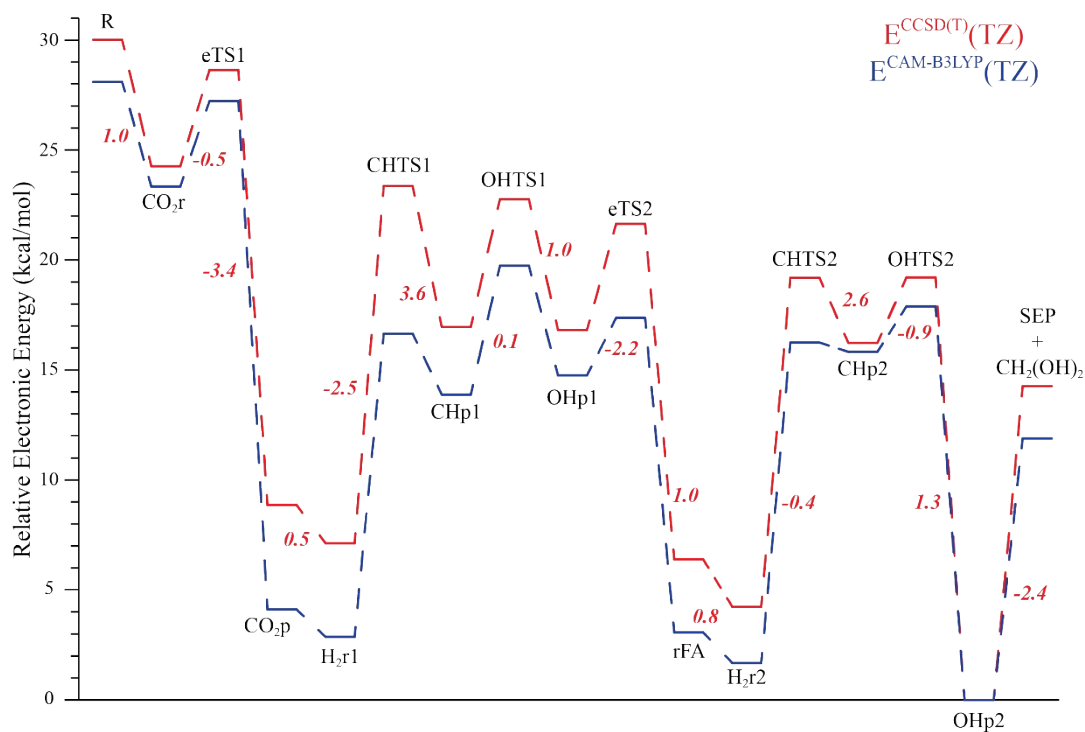

**Figure S2.** Comparison of CCSD(T) and CAM-B3LYP energetics of the  $\text{Li}(\text{H}_2\text{O})_4 + \text{CO}_2 + 2\text{H}_2 \rightarrow \text{Li}(\text{H}_2\text{O})_4 + \text{CH}_2(\text{OH})_2$ . In red is the relative energy difference between the two methods calculated as  $\Delta E(\text{CAM-B3LYP}) - \Delta \{E^{\text{CCSD(T)}}(\text{TZ})\}$ . See above for details.

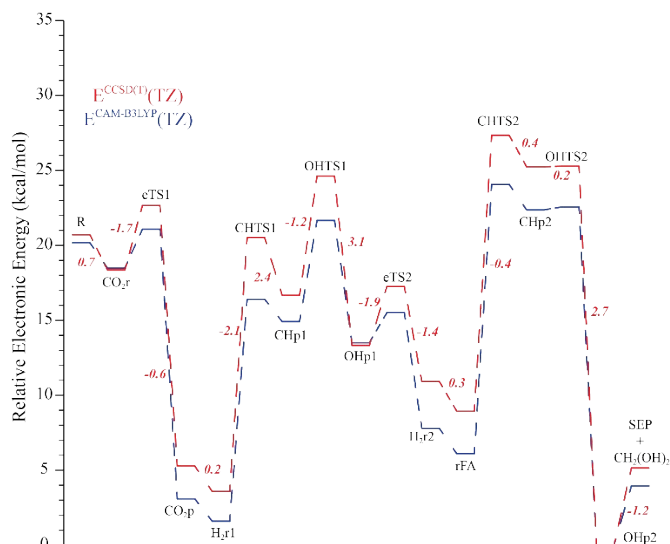

**Figure S3.** Comparison of CCSD(T) and CAM-B3LYP energetics of the  $\text{Li}(\text{NH}_3)_4 + \text{CO}_2 + 2\text{H}_2 \rightarrow \text{Li}(\text{NH}_3)_4 + \text{CH}_2(\text{OH})_2$ . In red is the relative energy difference between the two methods calculated as  $\Delta E(\text{CAM-B3LYP}) - \Delta \{E^{\text{CCSD(T)}}(\text{TZ})\}$ . See above for details.

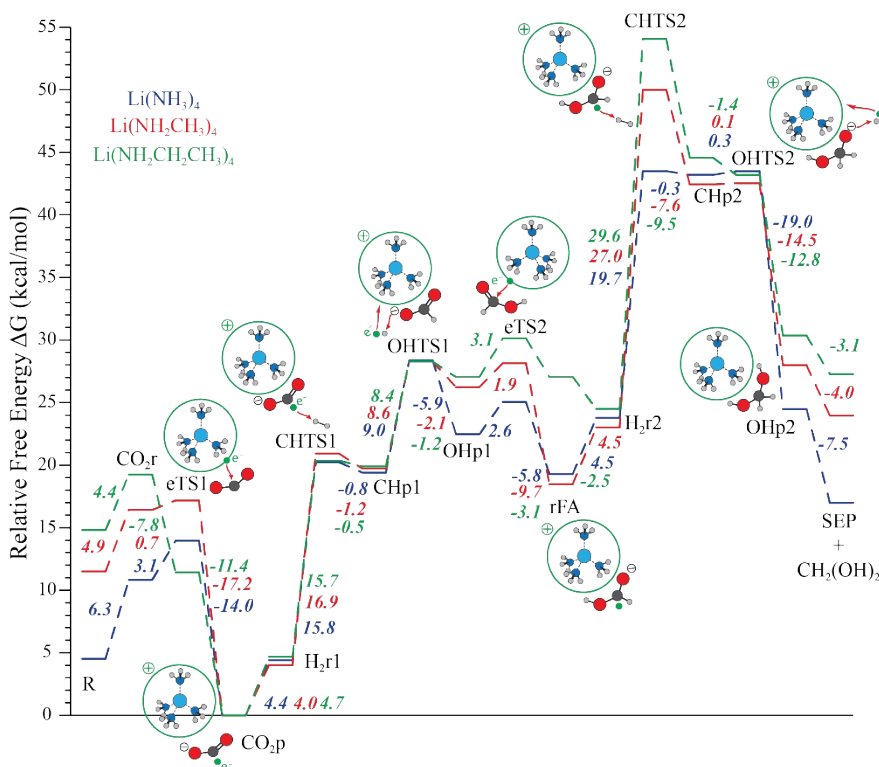

**Figure S4.** Relative Gibbs free energy at 298K of the reaction pathway for  $\text{Li}(\text{X})_4 + \text{CO}_2 + 2\text{H}_2 \rightarrow \text{Li}(\text{X})_4 + \text{CH}_2(\text{OH})_2$  ( $\text{X} = \text{NH}_3, \text{NH}_2\text{CH}_3, \text{NH}_2\text{CH}_2\text{CH}_3$ ). Graphical representations of transition states and select intermediates are given as figure insets. A green dot is used to indicate the movement of the SEP  $e^-$  throughout the pathway. Activation barriers are given in kcal/mol. Relative electronic energies are zeroed to the lowest point of the pathway.

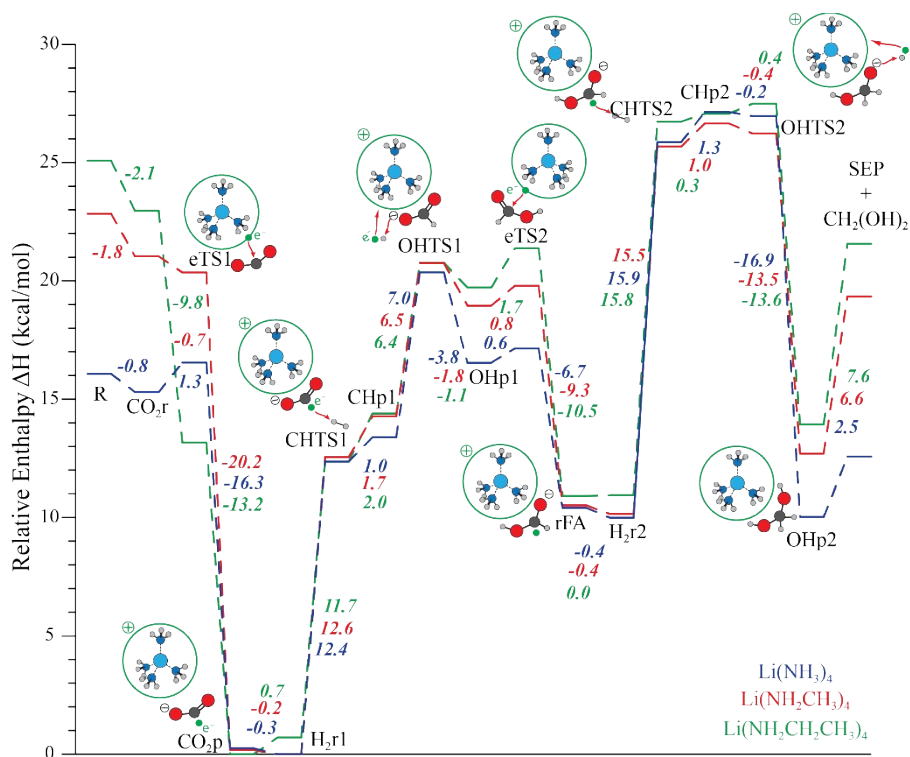

**Figure S5.** Relative enthalpy at 298K of the reaction pathway for  $\text{Li}(\text{X})_4 + \text{CO}_2 + 2 \text{H}_2 \rightarrow \text{Li}(\text{X})_4 + \text{CH}_2(\text{OH})_2$  ( $\text{X} = \text{NH}_3, \text{NH}_2\text{CH}_3, \text{NH}_2\text{CH}_2\text{CH}_3$ ). Graphical representations of transition states and select intermediates are given as figure insets. A green dot is used to indicate the movement of the SEP  $e^-$  throughout the pathway. Activation barriers are given in kcal/mol. Relative electronic energies are zeroed to the lowest point of the pathway.

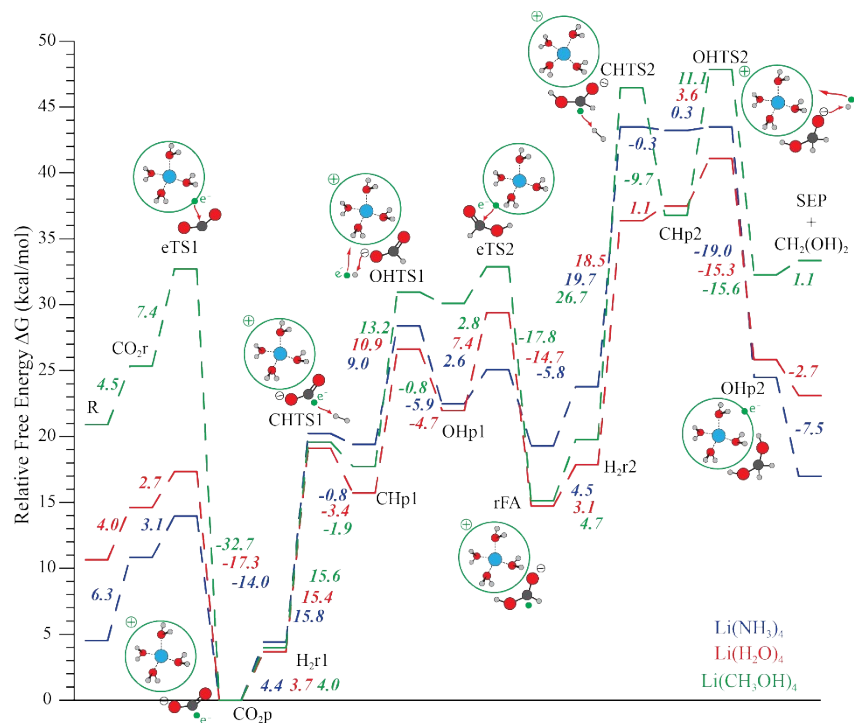

**Figure S6.** Relative Gibbs free energy at 298K of the reaction pathway for  $\text{Li}(\text{X})_4 + \text{CO}_2 + 2 \text{H}_2 \rightarrow \text{Li}(\text{X})_4 + \text{CH}_2(\text{OH})_2$  ( $\text{X} = \text{NH}_3, \text{H}_2\text{O}, \text{CH}_3\text{OH}$ ). Graphical representations of transition states and select intermediates are given as figure insets. A green dot is used to indicate the movement of the SEP  $e^-$  throughout the pathway. Activation barriers are given in kcal/mol. Relative electronic energies are zeroed to the lowest point of the pathway.

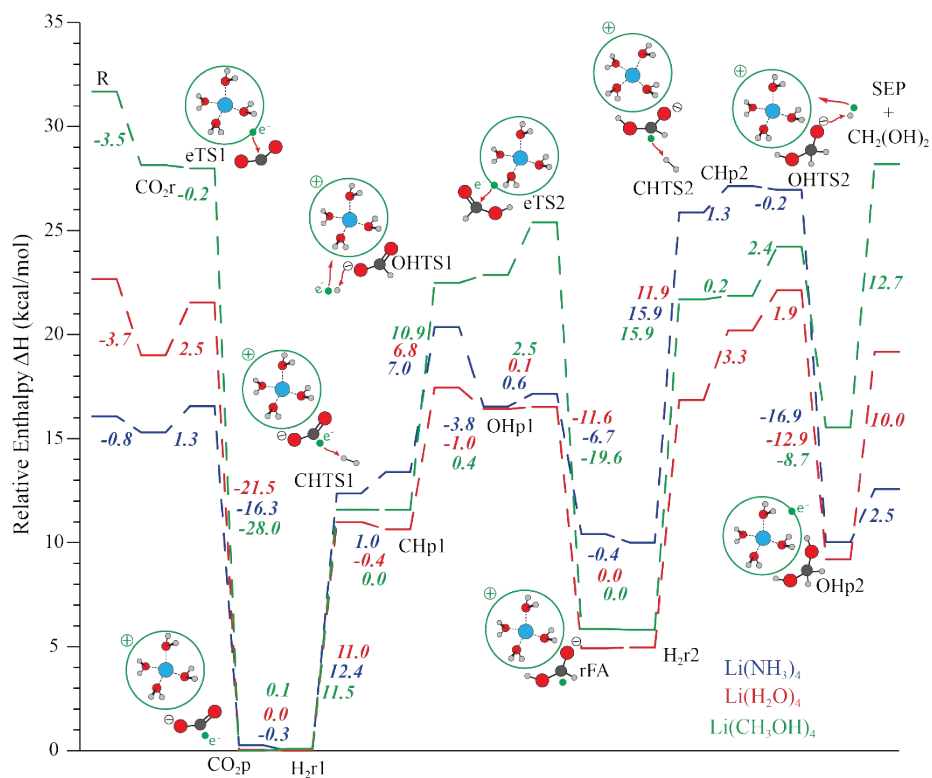

**Figure S7.** Relative enthalpy at 298K of the reaction pathway for  $\text{Li}(\text{X})_4 + \text{CO}_2 + 2 \text{H}_2 \rightarrow \text{Li}(\text{X})_4 + \text{CH}_2(\text{OH})_2$  ( $\text{X} = \text{NH}_3, \text{H}_2\text{O}, \text{CH}_3\text{OH}$ ). Graphical representations of transition states and select intermediates are given as figure insets. A green dot is used to indicate the movement of the SEP  $e^-$  throughout the pathway. Activation barriers are given in kcal/mol. Relative electronic energies are zeroed to the lowest point of the pathway.

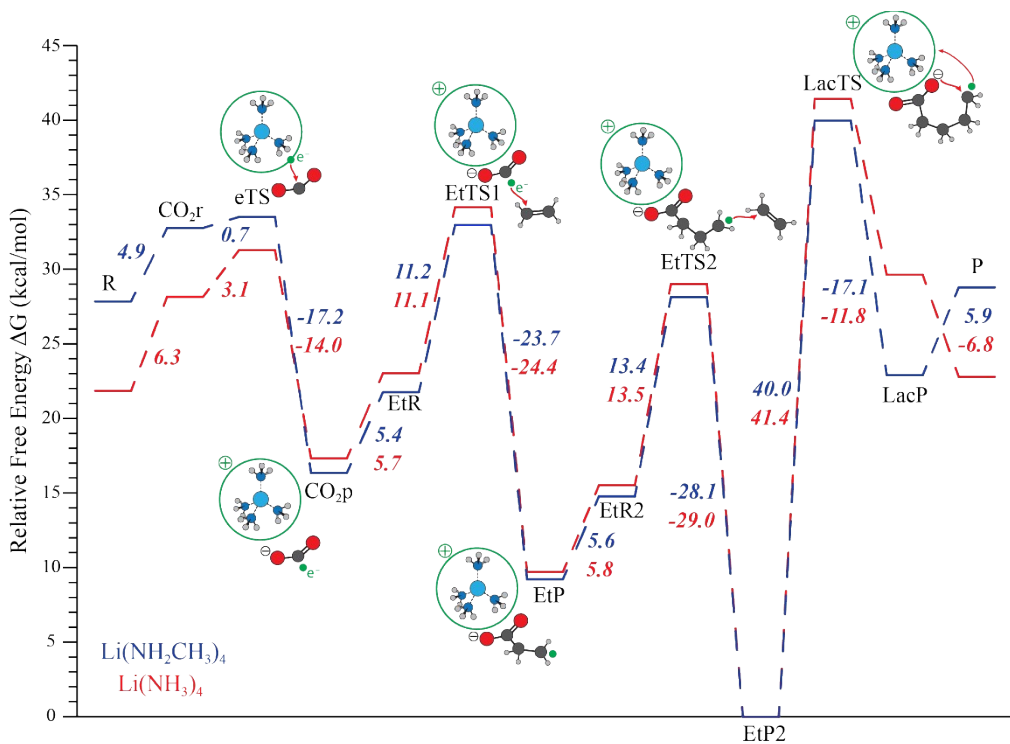

**Figure S8.** Relative Gibbs free energy at 298K of the reaction pathway for  $\text{Li}(\text{X})_4 + 2 \text{C}_2\text{H}_4 \rightarrow \text{Li}(\text{X})_4 + \text{C}_5\text{H}_8\text{O}_2$  ( $\text{X} = \text{NH}_3, \text{NH}_2\text{CH}_3$ ). Graphical representations of transition states and select intermediates are given as figure insets. A green dot is used to indicate the movement of the SEP  $e^-$  throughout the pathway. Activation barriers are given in kcal/mol. Relative electronic energies are zeroed to the lowest point of the pathway.



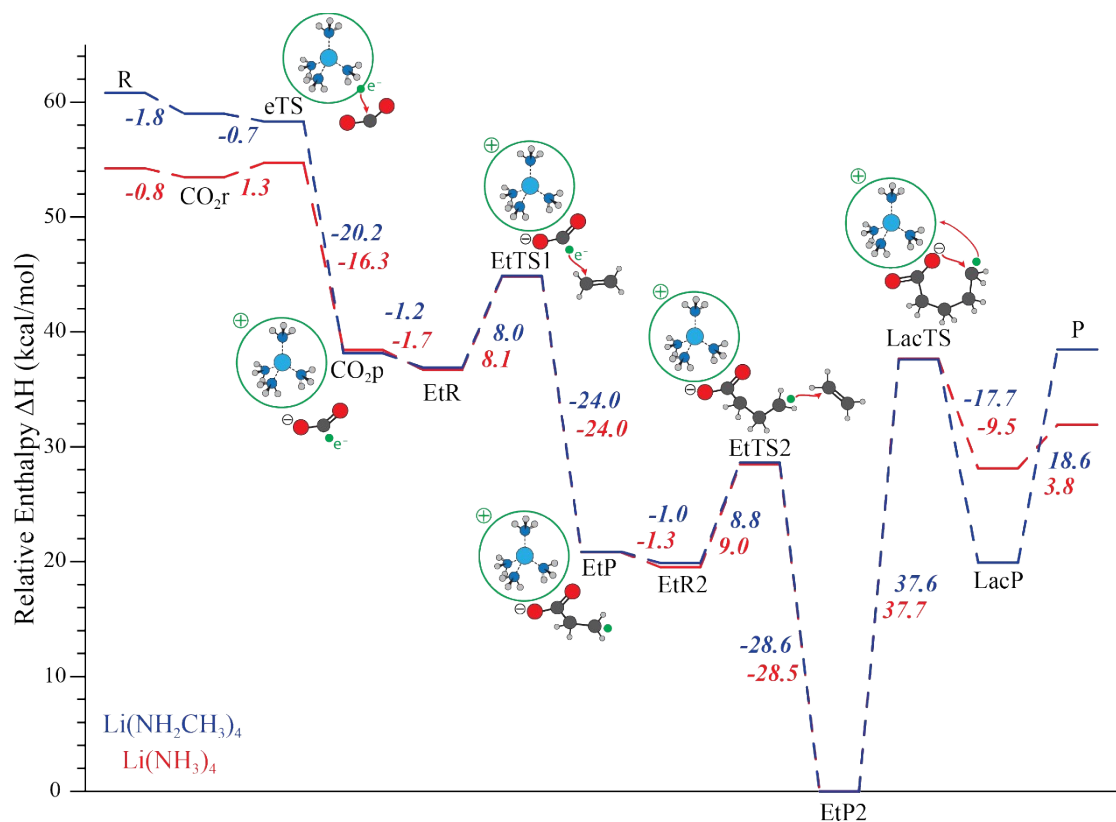

**Figure S9.** Relative enthalpy at 298K of the reaction pathway for  $\text{Li}(\text{X})_4 + 2 \text{C}_2\text{H}_4 \rightarrow \text{Li}(\text{X})_4 + \text{C}_5\text{H}_8\text{O}_2$  ( $\text{X} = \text{NH}_3, \text{NH}_2\text{CH}_3$ ). Graphical representations of transition states and select intermediates are given as figure insets. A green dot is used to indicate the movement of the SEP  $e^-$  throughout the pathway. Activation barriers are given in kcal/mol. Relative electronic energies are zeroed to the lowest point of the pathway.

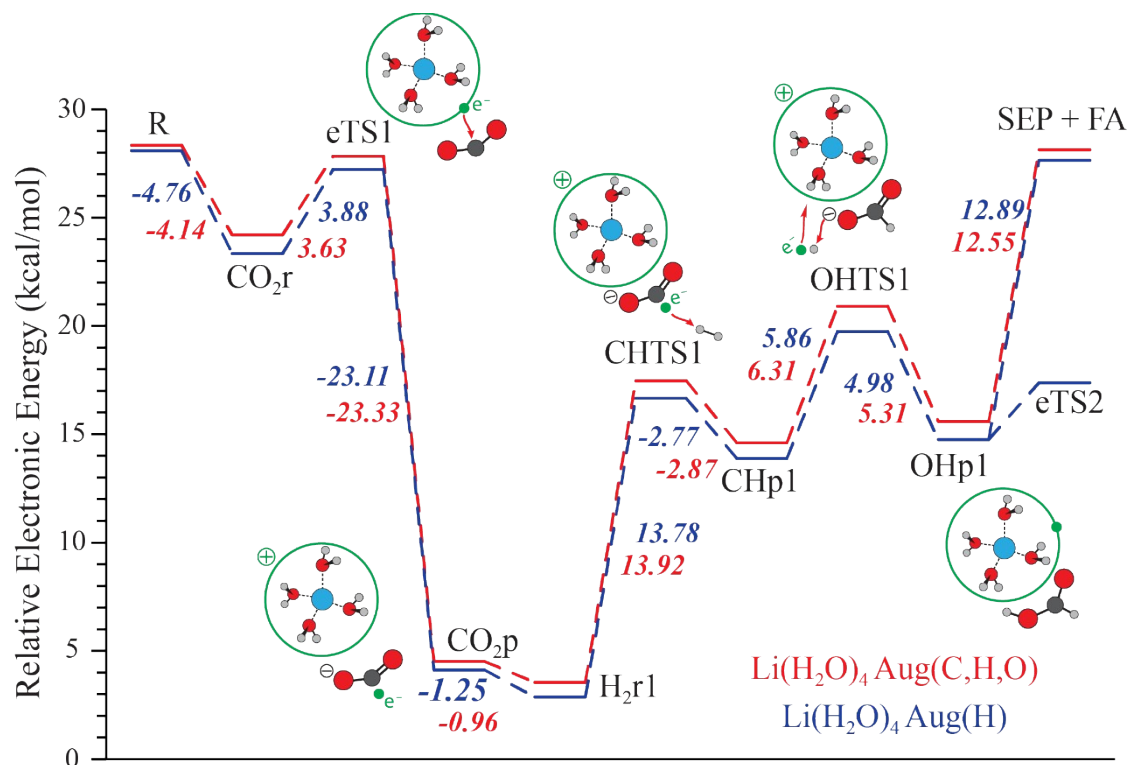

**Figure S10.** Effect of augmented functions on the reaction pathway for  $\text{Li}(\text{H}_2\text{O})_4 + \text{CO}_2 + \text{H}_2 \rightarrow \text{Li}(\text{H}_2\text{O})_4 + \text{CO}_2\text{H}_2$ . The pathway in red are the structures optimized with aug-cc-pVTZ (C, O, H), cc-pVTZ (Li) and in blue is those optimized with aug-cc-pVTZ (H), cc-pVTZ (Li, C, O). Graphical representations of transition states and select intermediates are given as figure insets. A green dot is used to indicate the movement of the SEP  $e^-$  throughout the pathway. Activation barriers are given in kcal/mol. Relative electronic energies are zeroed to the lowest point of the pathway (not shown). These results indicate the effect of augmented functions for C and O to be minimal.

**Table S1.** Cartesian Coordinates (Å) for the reactants, products, and intermediates of the  $\text{Li}(\text{NH}_3)_4 + \text{CO}_2 + 2\text{H}_2 \rightarrow \text{Li}(\text{NH}_3)_4 + \text{CH}_2(\text{OH})_2$  reaction pathway.

| <b>Li(NH<sub>3</sub>)<sub>4</sub></b> |           |           |           | <b>CO<sub>2</sub></b>  |           |           | <b>CO<sub>2</sub>r</b> |           |           |           |           |
|---------------------------------------|-----------|-----------|-----------|------------------------|-----------|-----------|------------------------|-----------|-----------|-----------|-----------|
| Li                                    | 0.000009  | -0.000012 | -0.000099 | C                      | 0.000000  | 0.000000  | -0.000010              | Li        | 1.333803  | -0.001072 | -0.011985 |
| N                                     | -0.002118 | -2.055733 | 0.121696  | O                      | 0.000000  | 0.000000  | -1.155618              | N         | 3.288410  | -0.001790 | -0.674313 |
| N                                     | 1.790986  | 0.638982  | -0.790750 | O                      | -0.000000 | -0.000000 | 1.155626               | N         | 1.437284  | 0.005041  | 2.045205  |
| N                                     | -1.545383 | 0.617417  | -1.213109 | <b>H<sub>2</sub></b>   |           |           | N                      | 0.482066  | 1.749026  | -0.700506 |           |
| N                                     | -0.243470 | 0.799328  | 1.882126  |                        |           |           | N                      | 0.480236  | -1.753232 | -0.692624 |           |
| H                                     | 0.115071  | -2.493213 | -0.788954 | H                      | 0.000000  | 0.000000  | 0.372728               | H         | 3.794477  | 0.814733  | -0.336390 |
| H                                     | -0.871010 | -2.415284 | 0.509192  | H                      | 0.000000  | 0.000000  | -0.372728              | H         | 3.384422  | -0.003755 | -1.687587 |
| H                                     | 0.748278  | -2.405079 | 0.712681  | <b>Formic Acid</b>     |           |           | H                      | 3.796385  | -0.815695 | -0.333014 |           |
| H                                     | 1.834706  | 1.651999  | -0.870016 | C                      | 0.133141  | 0.359641  | 0.000048               | H         | 0.551863  | 0.006969  | 2.544983  |
| H                                     | 1.953092  | 0.265471  | -1.722743 | O                      | -1.051295 | -0.277483 | -0.000051              | H         | 1.954490  | 0.821459  | 2.364792  |
| H                                     | 2.583914  | 0.355820  | -0.220235 | O                      | 1.167788  | -0.219220 | 0.000006               | H         | 1.954513  | -0.808861 | 2.371057  |
| H                                     | -0.249736 | 1.816274  | 1.868390  | H                      | 0.043055  | 1.457378  | -0.000214              | H         | -0.473211 | -1.960927 | -0.410612 |
| H                                     | 0.501427  | 0.520031  | 2.515792  | H                      | -1.773852 | 0.358403  | 0.000292               | H         | 1.060038  | -2.514123 | -0.344633 |
| H                                     | -1.117792 | 0.507308  | 2.311889  | <b>Methyldiol</b>      |           |           | H                      | 0.506496  | -1.809757 | -1.707407 |           |
| H                                     | -1.581365 | 1.629988  | -1.301480 | C                      | 0.000000  | 0.000000  | 0.528321               | H         | -0.469668 | 1.962219  | -0.416791 |
| H                                     | -2.451702 | 0.322489  | -0.858137 | O                      | 0.000000  | 1.165769  | -0.246760              | H         | 0.505285  | 1.799153  | -1.715720 |
| H                                     | -1.465022 | 0.244279  | -2.155821 | H                      | -0.889425 | -0.070276 | 1.155262               | H         | 1.065788  | 2.509953  | -0.360850 |
|                                       |           |           |           | H                      | 0.889425  | 0.070276  | 1.155262               | C         | -2.796321 | 0.000405  | 0.011418  |
|                                       |           |           |           | O                      | -0.000000 | -1.165769 | -0.246760              | O         | -2.791412 | -1.156081 | 0.010163  |
|                                       |           |           |           | H                      | -0.808755 | 1.191516  | -0.766144              | O         | -2.792379 | 1.156845  | 0.009460  |
|                                       |           |           |           | H                      | 0.808755  | -1.191516 | -0.766144              |           |           |           |           |
| <b>eTS1</b>                           |           |           |           | <b>CO<sub>2</sub>p</b> |           |           | <b>H<sub>2</sub>r1</b> |           |           |           |           |
| Li                                    | 1.293410  | 0.027261  | -0.000221 | Li                     | 1.240280  | 0.024100  | -0.012381              | Li        | 1.358767  | -0.083329 | -0.013311 |
| N                                     | 3.364924  | 0.057270  | 0.000105  | N                      | 3.327989  | -0.051503 | 0.129458               | N         | 3.408324  | -0.474941 | 0.151003  |
| N                                     | 0.564372  | 1.955620  | -0.000046 | N                      | 0.524386  | 1.895792  | -0.446936              | N         | 0.942490  | 1.861841  | -0.515856 |
| N                                     | 0.579950  | -0.990143 | -1.651582 | N                      | 0.482236  | -1.267950 | -1.436119              | N         | 0.413762  | -1.288040 | -1.401300 |
| N                                     | 0.580585  | -0.990700 | 1.651083  | N                      | 0.296483  | -0.532660 | 1.737640               | N         | 0.331733  | -0.423687 | 1.745713  |
| H                                     | 3.735682  | 0.535128  | -0.815264 | H                      | 3.774493  | 0.282797  | -0.715506              | H         | 3.595028  | -1.451424 | 0.342800  |
| H                                     | 3.760648  | -0.877679 | -0.000233 | H                      | 3.662654  | -0.992932 | 0.293162               | H         | 3.823061  | 0.061901  | 0.902693  |
| H                                     | 3.735234  | 0.534370  | 0.816127  | H                      | 3.663174  | 0.522382  | 0.893309               | H         | 3.905817  | -0.236018 | -0.697864 |
| H                                     | -0.454999 | 1.930284  | 0.000547  | H                      | -0.478068 | 1.688418  | -0.308671              | H         | -0.077010 | 1.817697  | -0.361263 |
| H                                     | 0.838609  | 2.497130  | -0.815237 | H                      | 0.621815  | 2.252097  | -1.389903              | H         | 1.081265  | 2.161986  | -1.473054 |
| H                                     | 0.839599  | 2.497302  | 0.814699  | H                      | 0.749636  | 2.665629  | 0.171388               | H         | 1.293418  | 2.609984  | 0.069617  |
| H                                     | -0.345116 | -1.335355 | 1.401755  | H                      | 0.042075  | 0.242095  | 2.338621               | H         | 0.181963  | 0.411631  | 2.299022  |
| H                                     | 0.460091  | -0.408329 | 2.475111  | H                      | 0.606590  | -1.282158 | 2.343150               | H         | 0.533712  | -1.172873 | 2.395681  |
| H                                     | 1.125227  | -1.798050 | 1.940656  | H                      | -0.575619 | -0.841504 | 1.288861               | H         | -0.572338 | -0.633701 | 1.305750  |
| H                                     | -0.345463 | -1.335404 | -1.401911 | H                      | -0.468493 | -1.307819 | -1.044210              | H         | -0.534442 | -1.173231 | -1.020025 |
| H                                     | 1.124772  | -1.797069 | -1.942017 | H                      | 0.810002  | -2.223023 | -1.510355              | H         | 0.594763  | -2.283401 | -1.442724 |
| H                                     | 0.458722  | -0.407278 | -2.475156 | H                      | 0.396902  | -0.918855 | -2.382807              | H         | 0.388055  | -0.960861 | -2.359279 |
| C                                     | -2.596192 | -0.028498 | 0.000152  | C                      | -2.577155 | -0.045518 | -0.027190              | C         | -2.429532 | 0.431450  | -0.022802 |
| O                                     | -2.564809 | 1.141235  | 0.000533  | O                      | -2.184932 | 1.116914  | -0.004583              | O         | -1.849594 | 1.511489  | -0.005517 |
| O                                     | -2.293302 | -1.162507 | -0.000065 | O                      | -2.000159 | -1.140923 | 0.046451               | O         | -2.042212 | -0.745031 | 0.053964  |
|                                       |           |           |           |                        |           |           | H                      | -4.372511 | -2.956151 | -0.021501 |           |
|                                       |           |           |           |                        |           |           | H                      | -3.879602 | -2.392128 | -0.007587 |           |
| <b>CHTS1</b>                          |           |           |           | <b>CHp1</b>            |           |           | <b>OHTS1</b>           |           |           |           |           |
| Li                                    | 1.387449  | 0.019223  | -0.002808 | Li                     | 1.372000  | 0.055054  | 0.000125               | Li        | 1.376701  | 0.056532  | -0.000036 |
| N                                     | 3.479043  | -0.064508 | 0.021038  | N                      | 3.465557  | 0.068014  | -0.000944              | N         | 3.464541  | 0.214274  | 0.000119  |
| N                                     | 0.653881  | 1.929482  | -0.088406 | N                      | 0.542463  | 1.925111  | 0.003254               | N         | 0.434575  | 1.885706  | -0.000459 |
| N                                     | 0.545754  | -1.000924 | -1.588528 | N                      | 0.551317  | -0.921647 | -1.620375              | N         | 0.677179  | -1.010694 | -1.626184 |
| N                                     | 0.513506  | -0.852097 | 1.652148  | N                      | 0.552792  | -0.926843 | 1.618180               | N         | 0.677012  | -1.010029 | 1.626474  |
| H                                     | 3.877256  | 0.387698  | -0.792651 | H                      | 3.853450  | -0.867092 | -0.007363              | H         | 3.878789  | -0.709876 | -0.004806 |
| H                                     | 3.821396  | -1.017282 | 0.031591  | H                      | 3.830991  | 0.539182  | 0.817263               | H         | 3.819869  | 0.694913  | 0.817491  |
| H                                     | 3.858514  | 0.398993  | 0.837332  | H                      | 3.830071  | 0.549981  | -0.813248              | H         | 3.819699  | 0.703515  | -0.812207 |
| H                                     | -0.354034 | 1.699445  | -0.059626 | H                      | -0.447947 | 1.623375  | 0.002236               | H         | -0.570061 | 1.655811  | -0.000251 |
| H                                     | 0.804900  | 2.473792  | -0.928977 | H                      | 0.666791  | 2.522619  | -0.804856              | H         | 0.591773  | 2.474876  | -0.809637 |
| H                                     | 0.832321  | 2.555129  | 0.687732  | H                      | 0.666144  | 2.519292  | 0.813914               | H         | 0.592017  | 2.475328  | 0.808342  |
| H                                     | 0.349902  | -0.243201 | 2.444487  | H                      | 0.364882  | -0.361931 | 2.437132               | H         | 0.658072  | -0.578680 | 2.542591  |
| H                                     | 0.810615  | -1.743328 | 2.028973  | H                      | 0.887086  | -1.821148 | 1.954174               | H         | 0.970200  | -1.969910 | 1.765983  |
| H                                     | -0.398737 | -1.002505 | 1.199910  | H                      | -0.353382 | -1.094140 | 1.155519               | H         | -0.289355 | -1.055128 | 1.295942  |
| H                                     | -0.380454 | -1.098425 | -1.150219 | H                      | -0.354360 | -1.090439 | -1.157308              | H         | -0.289285 | -1.055345 | -1.295864 |
| H                                     | 0.845451  | -1.929230 | -1.858957 | H                      | 0.884995  | -1.814752 | -1.960138              | H         | 0.970093  | -1.970737 | -1.765157 |

|                                  |                                 |                                  |
|----------------------------------|---------------------------------|----------------------------------|
| H 0.412818 -0.479675 -2.446343   | H 0.362554 -0.353584 -2.436952  | H 0.658607 -0.579784 -2.542515   |
| C -2.486480 -0.018973 -0.000702  | C -2.522709 -0.212267 0.000084  | C -2.674528 -0.008271 0.000041   |
| O -2.078759 1.144313 -0.001547   | O -2.128799 0.971375 0.000142   | O -2.390324 1.179509 0.000056    |
| O -1.861456 -1.097836 0.012244   | O -1.808770 -1.243878 -0.000336 | O -1.808310 -0.967555 -0.000031  |
| H -3.685305 -0.140675 -0.013562  | H -3.617842 -0.371749 0.000390  | H -3.723283 -0.333815 0.000094   |
| H -4.861681 -0.260056 -0.026397  | H -3.837525 2.296407 -0.000895  | H -2.354147 -2.121570 -0.000001  |
| <b>OHp1</b>                      | <b>eTS2</b>                     | <b>rFA</b>                       |
| Li -1.361508 0.107075 0.003873   | Li 1.423305 -0.025903 0.051707  | Li -1.361508 0.107075 0.003873   |
| N -3.423676 0.422910 -0.038443   | N 3.470249 -0.365443 0.244389   | N -3.423676 0.422910 -0.038443   |
| N -0.897674 -1.120262 1.599711   | N 0.337200 -0.283796 1.791436   | N -0.897674 -1.120262 1.599711   |
| N -0.920990 -0.952498 -1.717728  | N 0.931137 1.868628 -0.626813   | N -0.920990 -0.952498 -1.717728  |
| N -0.293490 1.875714 0.177501    | N 0.711210 -1.336230 -1.366060  | N -0.293490 1.875714 0.177501    |
| H -3.837760 0.896888 0.756779    | C -2.445652 0.211417 -0.386081  | H -3.837760 0.896888 0.756779    |
| H -3.834026 -0.504908 -0.076379  | O -2.872217 -0.892942 0.280332  | H -3.834026 -0.504908 -0.076379  |
| H -3.731762 0.911286 -0.872388   | O -1.758917 1.041397 0.197933   | H -3.731762 0.911286 -0.872388   |
| H 0.107816 -1.022602 1.708295    | H -2.919198 0.384961 -1.350428  | H 0.107816 -1.022602 1.708295    |
| H -1.052675 -2.084950 1.317110   | H -3.332564 -1.478935 -0.334269 | H -1.052675 -2.084950 1.317110   |
| H -1.317050 -1.010847 2.516666   | H -0.528813 0.169940 1.491840   | H -1.317050 -1.010847 2.516666   |
| H -0.529519 2.411242 1.004952    | H 0.626456 0.151743 2.658175    | H -0.529519 2.411242 1.004952    |
| H -0.417417 2.497551 -0.613256   | H 0.100394 -1.243873 2.009832   | H -0.417417 2.497551 -0.613256   |
| H 0.704307 1.673442 0.232660     | H 0.708921 -2.323448 -1.116193  | H 0.704307 1.673442 0.232660     |
| H -0.315145 -1.740102 -1.471278  | H 1.151409 -1.285851 -2.282900  | H -0.315145 -1.740102 -1.471278  |
| H -0.421941 -0.441794 -2.443828  | H -0.275195 -1.095343 -1.528526 | H -0.421941 -0.441794 -2.443828  |
| H -1.727446 -1.372277 -2.176073  | H -0.077560 1.823715 -0.471961  | H -1.727446 -1.372277 -2.176073  |
| C 2.767504 -0.092527 -0.241963   | H 1.074905 1.998091 -1.620796   | C 2.767504 -0.092527 -0.241963   |
| O 2.683073 1.081351 -0.019552    | H 1.271323 2.704462 -0.167654   | O 2.683073 1.081351 -0.019552    |
| O 1.945562 -0.975987 0.317366    | H 3.981159 0.198509 0.913598    | O 1.945562 -0.975987 0.317366    |
| H 3.517516 -0.526799 -0.912338   | H 3.906042 -0.227649 -0.660570  | H 3.517516 -0.526799 -0.912338   |
| H 2.056332 -1.876166 -0.060564   | H 3.617218 -1.336867 0.494435   | H 2.056332 -1.876166 -0.060564   |
| <b>H<sub>2</sub>r2</b>           | <b>CHTS2</b>                    | <b>CHp2</b>                      |
| Li 1.421853 -0.000387 -0.012932  | C -2.409819 0.339623 -0.088321  | Li -1.417123 -0.063831 -0.033510 |
| N 0.527369 -1.369530 -1.272640   | H -2.363613 0.429783 -1.258475  | N -0.455527 -1.687195 -0.884993  |
| N 0.444868 -0.158646 1.791269    | H -2.159683 0.397659 -2.593606  | N -0.943375 1.602234 -1.147999   |
| N 3.492868 -0.265338 0.202621    | Li 1.412675 -0.040823 -0.010137 | N -3.494356 -0.306048 0.176104   |
| N 0.901005 1.843129 -0.780499    | N 0.396283 -1.379007 -1.277151  | N -0.513784 0.169723 1.790715    |
| C -2.217093 -0.115303 -0.459455  | N 0.477627 -0.334209 1.837841   | C 2.603572 0.285232 -0.153503    |
| O -2.257336 -1.304628 0.345051   | N 3.535065 -0.268163 0.043953   | O 2.284412 -1.131021 0.128053    |
| O -1.550246 0.844532 0.070017    | N 0.794376 1.823555 -0.720160   | O 1.499065 1.013396 -0.017808    |
| H -3.203692 0.092190 -0.902098   | O -2.159181 -1.113671 0.160177  | H 3.102241 -1.636406 0.137543    |
| H -2.889933 -1.906743 -0.054680  | O -1.520683 1.081041 0.523630   | H -1.197805 2.524447 -0.816060   |
| H 0.652323 0.403702 2.606695     | H -3.479765 0.520631 0.187786   | H -1.035852 1.623745 -2.155477   |
| H 0.183245 -1.076945 2.128695    | H -2.967749 -1.582973 -0.103530 | H 0.060938 1.473384 -0.919659    |
| H -0.408890 0.226184 1.348461    | H 0.736948 0.059756 2.745144    | H -0.269788 -0.655112 2.324910   |
| H 0.999650 2.037085 -1.768765    | H 0.122276 -1.271780 2.045335   | H -0.744561 0.891390 2.462014    |
| H 1.108865 2.706383 -0.294704    | H -0.374026 0.190578 1.522189   | H 0.352105 0.478714 1.314402     |
| H -0.095756 1.623135 -0.599773   | H 0.682532 1.988880 -1.723849   | H -3.948189 -0.998293 -0.405886  |
| H 3.675672 -0.532339 1.161798    | H 1.065317 2.732594 -0.336787   | H -3.931646 0.586174 -0.017626   |
| H 3.983861 0.602447 0.028355     | H -0.177559 1.645597 -0.344001  | H -3.693266 -0.538883 1.140922   |
| H 3.903661 -0.972052 -0.393921   | H 3.864904 -0.798734 0.854174   | H 0.508779 -1.525610 -0.575809   |
| H 0.411184 -2.294421 -0.876591   | H 3.982867 0.649054 0.116925    | H -0.440356 -1.694919 -1.897429  |
| H 0.840548 -1.494622 -2.227135   | H 3.964736 -0.714833 -0.769895  | H -0.707665 -2.623221 -0.592792  |
| H -0.419868 -0.968880 -1.312038  | H 0.654618 -2.362790 -1.385837  | H 3.014486 0.306555 -1.177845    |
| H -3.132051 2.534626 0.476645    | H 0.221247 -1.044444 -2.228743  | H 3.400326 0.569042 0.553424     |
| H -3.673930 3.046690 0.568778    | H -0.536697 -1.388429 -0.828326 | H 1.741662 2.189092 1.228171     |
| <b>OHTS2</b>                     | <b>OHp2</b>                     |                                  |
| Li -1.422815 -0.062852 -0.030679 | Li 1.555604 0.056738 -0.039659  |                                  |
| N -0.429296 -1.519941 -1.116062  | N 0.475366 1.653648 0.705326    |                                  |
| N -1.011416 1.758438 -0.900054   | N 0.557529 -0.966896 -1.536596  |                                  |
| N -3.487207 -0.388249 0.158206   | N 3.420408 0.664343 -0.701246   |                                  |
| N -0.494413 -0.056734 1.793961   | N 1.943517 -1.250872 1.509826   |                                  |
| C 2.626690 0.276083 -0.139351    | C -3.136008 -0.093532 0.162320  |                                  |
| O 2.271933 -1.128498 0.119899    | O -2.558338 1.154246 -0.141010  |                                  |
| O 1.525647 1.027358 -0.032506    | O -2.249310 -1.161311 -0.022701 |                                  |
| H 3.080053 -1.643335 0.198866    | H -2.465705 1.232537 -1.095321  |                                  |
| H -1.218823 2.597133 -0.370980   | H 0.966413 -1.891390 -1.634521  |                                  |
| H -1.199327 1.974976 -1.870531   | H 0.594536 -0.534042 -2.454026  |                                  |
| H 0.004051 1.602775 -0.796586    | H -0.423530 -1.100608 -1.301578 |                                  |
| H -0.226044 -0.942355 2.205408   | H 2.542004 -0.822944 2.215991   |                                  |

|   |           |           |           |   |           |           |           |
|---|-----------|-----------|-----------|---|-----------|-----------|-----------|
| H | -0.743309 | 0.556936  | 2.559584  | H | 2.430017  | -2.090364 | 1.196439  |
| H | 0.360649  | 0.336655  | 1.378491  | H | 1.111767  | -1.573381 | 2.005158  |
| H | -3.967577 | -0.703278 | -0.675027 | H | 3.451162  | 1.301526  | -1.491907 |
| H | -3.901286 | 0.495374  | 0.428349  | H | 3.966320  | -0.153707 | -0.959626 |
| H | -3.687183 | -1.052351 | 0.895511  | H | 3.921115  | 1.114433  | 0.060727  |
| H | 0.515579  | -1.430994 | -0.730914 | H | -0.528132 | 1.578253  | 0.551053  |
| H | -0.358804 | -1.310713 | -2.104363 | H | 0.766139  | 2.559528  | 0.350835  |
| H | -0.691814 | -2.495039 | -1.043969 | H | 0.619182  | 1.677918  | 1.710654  |
| H | 3.064311  | 0.307089  | -1.148992 | H | -3.989646 | -0.290271 | -0.484350 |
| H | 3.397413  | 0.552576  | 0.597468  | H | -3.461369 | -0.023925 | 1.198459  |
| H | 1.656107  | 1.941131  | 1.154330  | H | -1.667597 | -1.237626 | 0.745589  |

**Table S2.** Cartesian Coordinates (Å) for the reactants, products, and intermediates of the  $\text{Li}(\text{NH}_2\text{CH}_3)_4 + \text{CO}_2 + 2\text{H}_2 \rightarrow \text{Li}(\text{NH}_2\text{CH}_3)_4 + \text{CH}_2(\text{OH})_2$  reaction pathway.

| Li(NH <sub>2</sub> CH <sub>3</sub> ) <sub>4</sub> |           |           |           | CO <sub>2</sub> r |           |           | eTS1      |    |           |           |            |
|---------------------------------------------------|-----------|-----------|-----------|-------------------|-----------|-----------|-----------|----|-----------|-----------|------------|
| Li                                                | 0.000082  | -0.268028 | 0.000075  | Li                | 0.973686  | 0.322844  | -0.144200 | Li | -0.864777 | 0.029861  | -0.317926  |
| N                                                 | 0.473285  | 0.826367  | -1.696485 | N                 | 3.041809  | 0.168478  | -0.300889 | N  | -2.870011 | -0.361435 | -0.734746  |
| N                                                 | -1.534619 | -1.571332 | -0.470398 | N                 | 0.483721  | 2.275193  | -0.612299 | N  | 0.302801  | -0.935460 | -1.726170  |
| N                                                 | 1.534997  | -1.571240 | 0.470062  | N                 | 0.079025  | -0.769937 | -1.654755 | N  | -0.441325 | 2.024854  | -0.636887  |
| N                                                 | -0.473227 | 0.826124  | 1.696735  | N                 | 0.150713  | -0.204753 | 1.684549  | N  | -0.296077 | -0.520777 | 1.596329   |
| H                                                 | 0.870764  | 0.096000  | -2.281813 | H                 | 3.175022  | 0.554453  | -1.232176 | H  | -2.999557 | 0.128792  | -1.613619  |
| C                                                 | 1.399822  | 1.961430  | -1.613232 | C                 | 3.698218  | -1.140592 | -0.206574 | C  | -3.880216 | 0.071031  | 0.236786   |
| H                                                 | -0.380889 | 1.109458  | -2.164231 | H                 | 3.484952  | 0.825363  | 0.331726  | H  | -2.987621 | -1.345081 | -0.947374  |
| H                                                 | -1.570252 | -2.216047 | 0.318669  | H                 | -0.534400 | 2.276009  | -0.683623 | H  | 1.166730  | -0.392928 | -1.678725  |
| H                                                 | -1.163893 | -2.128468 | -1.240050 | H                 | 0.801598  | 2.398181  | -1.573344 | H  | -0.070049 | -0.736981 | -2.650672  |
| C                                                 | -2.897571 | -1.130976 | -0.799337 | C                 | 0.913869  | 3.427587  | 0.192608  | C  | 0.624570  | -2.364552 | -1.619096  |
| H                                                 | -0.869989 | 0.095624  | 2.282375  | H                 | 0.174980  | 0.604235  | 2.294599  | H  | 0.713167  | -0.491648 | 1.487282   |
| C                                                 | -1.400586 | 1.960522  | 1.613526  | C                 | 0.644198  | -1.386807 | 2.398674  | C  | -0.704193 | -1.822000 | 2.134398   |
| H                                                 | 0.380919  | 1.109936  | 2.164089  | H                 | -0.825264 | -0.331033 | 1.436746  | H  | -0.520906 | 0.212683  | 2.257897   |
| H                                                 | 1.164457  | -2.128868 | 1.239442  | H                 | -0.823572 | -0.310454 | -1.775108 | H  | 0.575898  | 2.040711  | -0.526198  |
| C                                                 | 2.897844  | -1.130677 | 0.799162  | C                 | -0.122598 | -2.221481 | -1.557709 | C  | -1.031474 | 3.119202  | 0.145915   |
| H                                                 | 1.570768  | -2.215538 | -0.319346 | H                 | 0.590243  | -0.548887 | -2.507080 | H  | -0.582405 | 2.204813  | -1.629099  |
| H                                                 | 3.316193  | -0.583836 | -0.043693 | H                 | 0.837572  | -2.717392 | -1.427273 | H  | -2.109336 | 3.138806  | -0.004551  |
| H                                                 | 3.572144  | -1.955380 | 1.038050  | H                 | -0.611642 | -2.650362 | -2.434475 | H  | -0.632215 | 4.100844  | -0.116054  |
| H                                                 | 2.867840  | -0.457957 | 1.654559  | H                 | -0.737069 | -2.441830 | -0.687306 | H  | -0.843458 | 2.951338  | 1.204936   |
| H                                                 | -2.321342 | 1.638645  | 1.131797  | H                 | 1.680247  | -1.228429 | 2.691919  | H  | -0.439292 | -2.604339 | 1.426316   |
| H                                                 | -0.961957 | 2.743510  | 0.998181  | H                 | 0.616111  | -2.247990 | 1.734138  | H  | -1.785151 | -1.844308 | 2.262351   |
| H                                                 | -1.654855 | 2.389291  | 2.584846  | H                 | 0.068972  | -1.628822 | 3.294633  | H  | -0.242242 | -2.062996 | 3.093932   |
| H                                                 | 2.320650  | 1.640307  | -1.131135 | H                 | 3.243677  | -1.820988 | -0.923606 | H  | -3.749318 | 1.130969  | 0.443353   |
| H                                                 | 0.960449  | 2.744255  | -0.998209 | H                 | 3.543983  | -1.554168 | 0.787922  | H  | -3.736313 | -0.467094 | 1.171432   |
| H                                                 | 1.654108  | 2.390156  | -2.584567 | H                 | 4.771580  | -1.106968 | -0.402958 | H  | -4.907461 | -0.089066 | -0.096501  |
| H                                                 | -2.867710 | -0.457764 | -1.654352 | H                 | 2.001054  | 3.456114  | 0.238753  | H  | -0.291727 | -2.952538 | -1.641495  |
| H                                                 | -3.316131 | -0.584732 | 0.043800  | H                 | 0.537648  | 3.323476  | 1.208783  | H  | 1.123592  | -2.547954 | -0.670291  |
| H                                                 | -3.571618 | -1.955737 | -1.038734 | H                 | 0.564294  | 4.383285  | -0.202861 | H  | 1.278961  | -2.720866 | -2.416951  |
|                                                   |           |           |           | C                 | -3.747846 | -0.107119 | 0.058848  | C  | 3.441710  | 0.346637  | 0.258747   |
|                                                   |           |           |           | O                 | -4.671809 | 0.471276  | -0.315985 | O  | 4.323045  | 1.064883  | 0.041887   |
|                                                   |           |           |           | O                 | -2.838561 | -0.710615 | 0.457468  | O  | 2.684822  | -0.476749 | 0.604065   |
| CO <sub>2</sub> p                                 |           |           |           | H <sub>2</sub> r1 |           |           | CHTS1     |    |           |           |            |
| Li                                                | -0.692997 | -0.038287 | -0.419278 | Li                | -0.826316 | -0.022519 | -0.405429 | Li | -0.782417 | 0.491697  | -0.249618  |
| N                                                 | -2.678725 | -0.377240 | -0.999102 | N                 | -2.853806 | -0.419307 | -0.759972 | N  | -2.785327 | 1.028639  | -0.567085  |
| N                                                 | 0.635473  | -1.081770 | -1.624801 | N                 | 0.388529  | -0.934741 | -1.819565 | N  | -0.216899 | -1.074444 | -1.490111  |
| N                                                 | -0.111465 | 1.946988  | -0.619810 | N                 | -0.341806 | 1.993718  | -0.550557 | N  | 0.572217  | 1.995912  | -0.5725829 |
| N                                                 | -0.473846 | -0.539851 | 1.562422  | N                 | -0.341509 | -0.627702 | 1.498531  | N  | -0.440727 | 0.024668  | 1.724664   |
| H                                                 | -2.791027 | -0.204123 | -1.989827 | H                 | -3.098818 | -0.182536 | -1.712908 | H  | -3.041018 | 1.677573  | 0.166420   |
| C                                                 | -3.636399 | 0.422413  | -0.229887 | C                 | -3.738445 | 0.274487  | 0.180742  | C  | -3.681740 | -0.132092 | -0.552989  |
| H                                                 | -2.854624 | -1.364625 | -0.861785 | H                 | -2.970952 | -1.421505 | -0.678224 | H  | -2.880274 | 1.534616  | -1.438424  |
| H                                                 | 1.404227  | -0.416706 | -1.490327 | H                 | 1.147970  | -0.252799 | -1.725727 | H  | 0.769029  | -0.793894 | -1.517385  |
| H                                                 | 0.424298  | -1.078756 | -2.614903 | H                 | 0.065265  | -0.872598 | -2.776959 | H  | -0.554481 | -1.030238 | -2.443516  |
| C                                                 | 1.093786  | -2.415869 | -1.222607 | C                 | 0.927925  | -2.275569 | -1.568056 | C  | -0.295999 | -2.455297 | -1.002215  |
| H                                                 | 0.548043  | -0.429565 | 1.539090  | H                 | 0.667449  | -0.483078 | 1.366778  | H  | 0.519485  | -0.293375 | 1.536093   |
| C                                                 | -0.830291 | -1.859701 | 2.083040  | C                 | -0.600212 | -1.987444 | 1.973200  | C  | -1.172126 | -0.999842 | 2.470893   |
| H                                                 | -0.813576 | 0.175555  | 2.192915  | H                 | -0.623199 | 0.036891  | 2.208367  | H  | -0.347576 | 0.853643  | 2.298296   |
| H                                                 | 0.878394  | 1.729746  | -0.777308 | H                 | 0.634768  | 1.828075  | -0.815470 | H  | 1.330772  | 1.348265  | -0.966101  |
| C                                                 | -0.219437 | 2.831767  | 0.543658  | C                 | -0.369002 | 2.816929  | 0.661757  | C  | 1.036273  | 2.896323  | 0.333248   |
| H                                                 | -0.435423 | 2.431049  | -1.447615 | H                 | -0.764697 | 2.502249  | -1.316843 | H  | 0.374307  | 2.529874  | -1.562640  |
| H                                                 | -1.265684 | 2.993645  | 0.803419  | H                 | -1.390658 | 2.924224  | 1.026196  | H  | 0.219694  | 3.529803  | 0.679742   |
| H                                                 | 0.249882  | 3.806408  | 0.393364  | H                 | 0.049178  | 3.815555  | 0.518419  | H  | 1.860994  | 3.542239  | 0.024072   |
| H                                                 | 0.272038  | 2.359860  | 1.391902  | H                 | 0.216847  | 2.325417  | 1.435664  | H  | 1.385111  | 2.301417  | 1.174798   |
| H                                                 | -0.435853 | -2.628252 | 1.421275  | H                 | -0.268235 | -2.702051 | 1.222663  | H  | -1.266887 | -1.895582 | 1.860192   |
| H                                                 | -1.914338 | -1.974288 | 2.113427  | H                 | -1.669760 | -2.138284 | 2.123007  | H  | -2.178282 | -0.651400 | 2.704926   |
| H                                                 | -0.442071 | -2.053890 | 3.085559  | H                 | -0.090816 | -2.228071 | 2.909025  | H  | -0.687427 | -1.286171 | 3.407101   |
| H                                                 | -3.430698 | 1.478592  | -0.390268 | H                 | -3.599103 | 1.348464  | 0.077414  | H  | -3.569144 | -0.659646 | 0.391544   |
| H                                                 | -3.500540 | 0.218896  | 0.830082  | H                 | -3.460968 | 0.003810  | 1.197168  | H  | -3.392021 | -0.816926 | -1.866775  |
| H                                                 | -4.680282 | 0.231079  | -0.487139 | H                 | -4.797595 | 0.048860  | 0.040438  | H  | -4.735592 | 0.122567  | -0.683087  |
| H                                                 | 0.267574  | -3.126416 | -1.251799 | H                 | 0.124326  | -3.011972 | -1.555291 | H  | -1.335458 | -2.747323 | -0.851936  |
| H                                                 | 1.467948  | -2.362160 | -0.202968 | H                 | 1.414640  | -2.278515 | -0.595643 | H  | 0.219442  | -2.516907 | -0.046651  |
| H                                                 | 1.898867  | -2.803588 | -1.850694 | H                 | 1.666418  | -2.589904 | -2.308756 | H  | 0.167278  | -3.179303 | -1.676183  |
| C                                                 | 2.931765  | 0.521257  | 0.344440  | C                 | 2.866123  | 0.625036  | -0.018877 | C  | 2.866262  | -0.579634 | -0.026716  |
| O                                                 | 2.607660  | 0.914906  | -0.784532 | O                 | 2.380838  | 1.080447  | -1.062026 | O  | 2.522019  | -0.122620 | -1.132488  |



|                                 |                                 |                                 |
|---------------------------------|---------------------------------|---------------------------------|
| H -0.112663 -0.899240 3.514106  | H -1.381426 -2.555776 -1.918438 | H -0.890971 -3.152394 -0.213033 |
| H -2.143379 -2.226902 -1.733747 | H 0.296955 -2.506955 1.777483   | H -0.312858 -3.390130 -1.860832 |
| H -1.569837 -2.786905 -0.167997 | H -0.990286 -2.118219 2.911753  | H -1.864164 -2.601019 -1.567445 |
| H -0.866938 -3.440087 -1.649545 | H 0.700626 -1.982324 3.406581   | H 0.179665 -2.394132 1.928765   |
|                                 |                                 | H -0.956534 -1.795092 3.130758  |
|                                 |                                 | H 0.779504 -1.769790 3.459383   |
| CHTS2                           | CHp2                            | OHTS2                           |
| C 2.797093 -0.307362 -0.882514  | Li 0.810724 -0.177277 -0.341133 | Li 0.808004 -0.166072 -0.347089 |
| H 2.378778 0.024521 -1.928739   | N -0.515001 -1.409671 -1.363427 | N -0.530913 -1.385325 -1.366519 |
| H 1.782861 0.566468 -3.025499   | N 0.475169 -0.028420 1.690120   | N 0.489745 -0.032687 1.688641   |
| Li -0.746037 0.184183 0.183194  | N 2.789578 -0.763073 -0.744466  | N 2.779406 -0.769554 -0.761912  |
| N 0.034936 1.969597 -0.519267   | N 0.363944 1.719209 -1.015797   | N 0.383460 1.739111 -1.012381   |
| N 0.480943 -0.333437 1.771382   | C -2.948088 0.412336 0.570374   | C -3.000791 0.425388 0.569250   |
| N -2.822842 0.153206 0.516237   | O -3.121770 -0.094233 -0.788868 | O -3.156711 -0.089831 -0.788544 |
| N -0.462415 -1.245640 -1.294996 | O -1.842796 1.162998 0.706508   | O -1.865736 1.137796 0.725128   |
| O 2.761867 0.960493 -0.085333   | H -3.281735 0.683849 -1.332052  | H -3.322879 0.679965 -1.336547  |
| O 2.084407 -1.248573 -0.314303  | H 1.040371 0.676961 2.146426    | H 1.048537 0.681268 2.139587    |
| H 3.879882 -0.537468 -1.048583  | C 0.294648 -1.162408 2.594884   | C 0.346475 -1.175855 2.588656   |
| H 3.549967 1.467629 -0.340064   | H -0.437130 0.423636 1.488821   | H -0.432287 0.401558 1.506697   |
| C 0.155091 -1.423255 2.706269   | H 0.157508 1.827403 -2.000809   | H 0.185378 1.851089 -1.998821   |
| H 0.929130 0.427205 2.289593    | C 1.066015 2.912015 -0.539716   | C 1.113147 2.915679 -0.535159   |
| H 1.224759 -0.668340 1.115548   | H -0.547929 1.653862 -0.540927  | H -0.532069 1.701307 -0.548193  |
| H -0.484358 -0.971633 -2.280807 | H 2.880387 -1.765177 -0.636156  | H 2.855344 -1.774544 -0.669680  |
| C -1.052652 -2.587000 -1.157758 | C 3.756265 -0.069466 0.112327   | C 3.757584 -0.104780 0.104878   |
| H 0.561174 -1.313029 -1.042742  | H 2.977888 -0.562614 -1.718426  | H 2.970811 -0.556974 -1.732733  |
| C -3.490894 0.591308 -0.726719  | H -1.404521 -0.933252 -1.181522 | H -1.418068 -0.909590 -1.174157 |
| H -3.206227 0.669537 1.312096   | C -0.651680 -2.830603 -1.035417 | C -0.667216 -2.807708 -1.043996 |
| H -3.060605 -0.826611 0.695896  | H -0.356069 -1.313069 -2.359232 | H -0.381501 -1.284427 -2.363401 |
| H 1.033199 1.702628 -0.476150   | H -2.916930 -0.506975 1.173378  | H -3.016199 -0.479058 1.189942  |
| C -0.160207 3.166920 0.317402   | H -3.867603 0.959409 0.820813   | H -3.897267 1.020018 0.789991   |
| H -0.134460 2.209290 -1.499469  | H -2.326979 2.669853 0.123431   | H -2.235229 2.549835 0.306038   |
| H -0.237197 -2.279185 2.133867  | H 0.279182 -3.357779 -1.244175  | H 0.260779 -3.335437 -1.263677  |
| H -0.629491 -1.106214 3.413242  | H -1.455346 -3.329249 -1.581904 | H -1.476635 -3.302176 -1.585641 |
| H 1.020953 -1.785446 3.289762   | H -0.858532 -2.937011 0.027327  | H -0.864782 -2.918713 0.020059  |
| H -3.072907 0.018101 -1.567545  | H 1.269700 2.810349 0.525141    | H 1.314739 2.809021 0.529482    |
| H -3.258726 1.653174 -0.899430  | H 0.494227 3.832205 -0.675708   | H 0.562074 3.848118 -0.670790   |
| H -4.587957 0.467567 -0.720757  | H 2.022296 3.020284 -1.052382   | H 2.071014 3.000048 -1.049035   |
| H -2.135814 -2.561952 -1.371936 | H -0.360884 -1.895982 2.129050  | H -0.305819 -1.917152 2.130555  |
| H -0.925774 -2.925895 -0.116610 | H -0.147898 -0.889409 3.556376  | H -0.080596 -0.917043 3.560892  |
| H -0.593318 -3.351429 -1.810646 | H 1.248399 -1.653848 2.790426   | H 1.312251 -1.652094 2.760861   |
| H -1.217126 3.478353 0.289567   | H 3.541819 -0.303732 1.152469   | H 3.539802 -0.351263 1.141492   |
| H 0.461452 4.031772 0.022667    | H 3.638914 1.004686 -0.013329   | H 3.657864 0.972931 -0.004320   |
| H 0.084786 2.913309 1.360673    | H 4.796445 -0.330252 -0.094479  | H 4.793226 -0.379352 -0.106578  |
| OHP2                            |                                 |                                 |
| Li 0.852163 -0.025984 -0.270139 |                                 |                                 |
| N -0.312103 -1.244183 -1.474786 |                                 |                                 |
| N 0.097607 -0.033016 1.657317   |                                 |                                 |
| N 2.827505 -0.734867 -0.316593  |                                 |                                 |
| N 0.803622 1.878769 -1.072080   |                                 |                                 |
| C -3.639744 0.423181 0.257985   |                                 |                                 |
| O -3.062881 -0.088764 -0.914323 |                                 |                                 |
| O -2.697491 1.019517 1.113808   |                                 |                                 |
| H -2.890916 0.654030 -1.519790  |                                 |                                 |
| H 0.536155 0.690538 2.214665    |                                 |                                 |
| C 0.078823 -1.291308 2.407339   |                                 |                                 |
| H -0.859916 0.284155 1.503282   |                                 |                                 |
| H 0.802163 1.804145 -2.087869   |                                 |                                 |
| C 1.775777 2.905450 -0.670130   |                                 |                                 |
| H -0.140670 2.220078 -0.865290  |                                 |                                 |
| H 2.826745 -1.746511 -0.357614  |                                 |                                 |
| C 3.713283 -0.271288 0.756124   |                                 |                                 |
| H 3.171545 -0.417152 -1.215108  |                                 |                                 |
| H -1.258974 -1.013982 -1.175684 |                                 |                                 |
| C -0.140115 -2.697675 -1.527116 |                                 |                                 |
| H -0.238718 -0.858853 -2.411249 |                                 |                                 |
| H -4.065198 -0.418759 0.795783  |                                 |                                 |
| H -4.421919 1.142042 0.007480   |                                 |                                 |
| H -2.475205 1.896750 0.754965   |                                 |                                 |
| H 0.850593 -2.941384 -1.909724  |                                 |                                 |



|   |           |           |           |  |  |
|---|-----------|-----------|-----------|--|--|
| H | -0.876137 | -3.202510 | -2.156474 |  |  |
| H | -0.217426 | -3.112167 | -0.523241 |  |  |
| H | 1.750237  | 3.028249  | 0.411337  |  |  |
| H | 1.582523  | 3.879285  | -1.123692 |  |  |
| H | 2.780540  | 2.592270  | -0.950381 |  |  |
| H | -0.441346 | -2.049290 | 1.824771  |  |  |
| H | -0.417605 | -1.215426 | 3.377204  |  |  |
| H | 1.095947  | -1.644420 | 2.573943  |  |  |
| H | 3.335959  | -0.626149 | 1.712877  |  |  |
| H | 3.706452  | 0.816083  | 0.782421  |  |  |
| H | 4.747105  | -0.606176 | 0.649711  |  |  |

**Table S3.** Cartesian Coordinates (Å) for the reactants, products, and intermediates of the  $\text{Li}(\text{NH}_2\text{CH}_2\text{CH}_3)_4 + \text{CO}_2 + 2\text{H}_2 \rightarrow \text{Li}(\text{NH}_2\text{CH}_2\text{CH}_3)_4 + \text{CH}_2(\text{OH})_2$  reaction pathway.

| $\text{Li}(\text{NH}_2\text{CH}_2\text{CH}_3)_4$ |           |           |           | $\text{CO}_2\text{r}$ |           |           | eTS1           |    |           |           |           |
|--------------------------------------------------|-----------|-----------|-----------|-----------------------|-----------|-----------|----------------|----|-----------|-----------|-----------|
| Li                                               | 0.082002  | -0.321862 | -0.391258 | Li                    | 0.520726  | 0.379080  | -0.302331      | Li | -0.574631 | -0.002202 | -0.405524 |
| N                                                | 0.336960  | 1.745350  | -0.486802 | N                     | -0.372371 | -0.257296 | 1.470432       | C  | 3.576261  | 1.036691  | 0.412723  |
| N                                                | -1.044876 | -0.993179 | -1.995223 | N                     | -0.208824 | -0.658715 | -1.943243      | O  | 4.320125  | 1.914653  | 0.288205  |
| N                                                | 1.919654  | -1.227546 | -0.693749 | N                     | -0.074728 | 2.336502  | -0.640621      | O  | 2.968723  | 0.068524  | 0.664994  |
| N                                                | -0.687670 | -1.020585 | 1.406571  | N                     | 2.605488  | 0.389258  | -0.291561      | N  | -2.415661 | -0.886314 | -0.847837 |
| H                                                | 1.020223  | 1.828265  | -1.234911 | H                     | -0.762569 | 0.589594  | 1.873107       | N  | 0.825058  | -0.756218 | -1.734270 |
| C                                                | 0.804270  | 2.467489  | 0.702318  | C                     | 0.364399  | -1.002094 | 2.496959       | N  | -0.569666 | 2.040347  | -0.716728 |
| H                                                | -0.509583 | 2.174788  | -0.843624 | H                     | -1.176877 | -0.792223 | 1.158434       | N  | -0.007539 | -0.409852 | 1.546930  |
| H                                                | -0.791877 | -1.982906 | -2.008452 | H                     | -0.037422 | -0.023015 | -2.721109      | H  | -2.584242 | -0.643871 | -1.818792 |
| H                                                | -0.575468 | -0.603736 | -2.813121 | H                     | -1.217148 | -0.611973 | -1.800978      | C  | -3.573754 | -0.507297 | -0.029623 |
| C                                                | -2.501173 | -0.865299 | -2.162022 | C                     | 0.162809  | -2.026119 | -2.338754      | H  | -2.294606 | -1.893064 | -0.830220 |
| H                                                | -0.746480 | -2.014771 | 1.194475  | H                     | 2.786430  | 0.775654  | -1.214514      | H  | 1.584220  | -0.081041 | -1.625249 |
| C                                                | -1.985421 | -0.536806 | 1.893984  | C                     | 3.362671  | -0.856115 | -0.115015      | H  | 0.501687  | -0.627306 | -2.689513 |
| H                                                | 0.006693  | -0.944133 | 2.142957  | H                     | 2.935135  | 1.088183  | 0.365652       | C  | 1.357512  | -2.116110 | -1.571743 |
| H                                                | 1.704873  | -2.225641 | -0.666060 | H                     | 0.161341  | 2.541167  | -1.611556      | H  | 0.985993  | -0.204475 | 1.479473  |
| C                                                | 3.076841  | -0.949838 | 0.169989  | C                     | 0.395094  | 3.433816  | 0.218520       | C  | -0.201873 | -1.751877 | 2.106285  |
| H                                                | 2.169486  | -1.046644 | -1.665991 | H                     | -1.095492 | 2.307251  | -0.628881      | H  | -0.385422 | 0.284087  | 2.182585  |
| H                                                | 3.285056  | 0.119109  | 0.115411  | H                     | 0.130275  | 3.189482  | 1.247877       | H  | 0.429796  | 2.240543  | -0.615419 |
| C                                                | 4.330838  | -1.737363 | -0.172715 | C                     | -0.152290 | 4.805027  | -0.142585      | C  | -1.339279 | 2.972597  | 0.119378  |
| H                                                | 2.781005  | -1.155821 | 1.199287  | H                     | 1.484736  | 3.448329  | 0.174886       | H  | -0.765416 | 2.222265  | -1.698824 |
| H                                                | -2.705687 | -0.660072 | 1.085516  | H                     | 2.977483  | -1.578738 | -0.834014      | H  | -2.394126 | 2.706913  | 0.042143  |
| H                                                | -1.897622 | 0.536262  | 2.067626  | H                     | 3.127209  | -1.249166 | 0.874035       | C  | -1.147692 | 4.440196  | -0.225656 |
| C                                                | -2.491691 | -1.227067 | 3.149223  | C                     | 4.866635  | -0.713939 | -0.275580      | H  | -1.050613 | 2.798323  | 1.156443  |
| H                                                | 1.709735  | 1.972561  | 1.053361  | H                     | 1.223063  | -0.398831 | 2.794382       | H  | 0.223211  | -2.467158 | 1.402014  |
| H                                                | 0.057626  | 2.333450  | 1.485418  | H                     | 0.766317  | -1.901665 | 2.030022       | H  | -1.274148 | -1.951623 | 2.140087  |
| C                                                | 1.070982  | 3.947462  | 0.485852  | C                     | -0.454249 | -1.377324 | 3.720988       | C  | 0.407271  | -1.959530 | 3.482933  |
| C                                                | -2.954606 | 0.577258  | -2.050403 | C                     | -0.044558 | -3.006538 | -1.201409      | H  | -3.677617 | 0.575480  | -0.092013 |
| H                                                | -2.976338 | -1.463418 | -1.385056 | H                     | 1.212279  | -2.013791 | -2.633075      | H  | -3.332502 | -0.733413 | 1.009295  |
| H                                                | -2.830560 | -1.279298 | -3.118687 | H                     | -0.403314 | -2.355948 | -3.214096      | C  | -4.878055 | -1.180267 | -0.421325 |
| H                                                | 1.837434  | 4.098819  | -0.274496 | H                     | -0.843588 | -0.488024 | 4.217478       | H  | 0.519657  | -2.815149 | -1.595617 |
| H                                                | 1.413075  | 4.420163  | 1.406690  | H                     | 0.151228  | -1.926902 | 4.442090       | H  | 1.791233  | -2.177148 | -0.574459 |
| H                                                | 0.167926  | 4.464305  | 0.159184  | H                     | -1.302252 | -2.004343 | 3.445246       | C  | 2.395194  | -2.517648 | -2.606637 |
| H                                                | 4.658040  | -1.524698 | -1.190347 | H                     | -1.240079 | 4.817828  | -0.079495      | H  | -5.148919 | -0.938915 | -1.449570 |
| H                                                | 4.148851  | -2.809230 | -0.098043 | H                     | 0.125872  | 5.079500  | -1.159988      | H  | -5.693492 | -0.855599 | 0.224911  |
| H                                                | 5.146113  | -1.482993 | 0.506301  | H                     | 0.236690  | 5.567886  | 0.533613       | H  | -4.799003 | -2.265084 | -0.340510 |
| H                                                | -2.477342 | 1.198223  | -2.808920 | H                     | -1.088554 | -3.025993 | -0.889477      | H  | -1.451545 | 4.642403  | -1.253129 |
| H                                                | -2.711947 | 0.989664  | -1.070824 | H                     | 0.560661  | -2.735826 | -0.336254      | H  | -0.101630 | 4.727370  | -0.124324 |
| H                                                | -4.032982 | 0.652766  | -2.190992 | H                     | 0.231974  | -4.015153 | -1.507829      | H  | -1.741289 | 5.075101  | 0.433579  |
| H                                                | -2.614701 | -2.297106 | 2.982018  | H                     | 5.119665  | -0.348133 | -1.271001      | H  | 1.483503  | -1.790236 | 3.459144  |
| H                                                | -3.456040 | -0.820399 | 3.454894  | H                     | 5.365784  | -1.672498 | -0.133176      | H  | 0.231568  | -2.974910 | 3.839020  |
| H                                                | -1.794237 | -1.095226 | 3.977216  | H                     | 5.274077  | -0.012446 | 0.453375       | H  | -0.024566 | -1.269804 | 4.209148  |
|                                                  |           |           |           | C                     | -4.126609 | -0.512288 | -0.325434      | H  | 1.980266  | -2.474951 | -3.614441 |
|                                                  |           |           |           | O                     | -5.114673 | 0.023454  | -0.581576      | H  | 2.747564  | -3.534615 | -2.429727 |
|                                                  |           |           |           | O                     | -3.154761 | -1.088734 | -0.050793      | H  | 3.254688  | -1.849204 | -2.569924 |
| $\text{CO}_2\text{p}$                            |           |           |           | $\text{H}_2\text{r1}$ |           |           | $\text{CHTS1}$ |    |           |           |           |
| Li                                               | -0.432173 | 0.170549  | -0.491934 | Li                    | -0.381361 | 0.214579  | -0.480686      | Li | -0.542896 | 0.152622  | -0.498090 |
| N                                                | -2.475662 | 0.419406  | -0.883154 | N                     | -2.397747 | 0.637738  | -0.859602      | N  | -2.603169 | 0.246058  | -0.862606 |
| N                                                | 0.466011  | -1.100859 | -1.877261 | N                     | 0.430335  | -1.083538 | -1.895016      | N  | 0.463432  | -1.037237 | -1.881121 |
| N                                                | 0.650581  | 1.936219  | -0.709750 | N                     | 0.815389  | 1.912200  | -0.676224      | N  | 0.425629  | 1.982796  | -0.720791 |
| N                                                | -0.122038 | -0.464424 | 1.439284  | N                     | -0.084793 | -0.471326 | 1.435923       | N  | -0.145797 | -0.463446 | 1.421031  |
| H                                                | -2.599212 | 0.790529  | -1.817995 | H                     | -2.482007 | 0.999427  | -1.802512      | H  | -2.771760 | 0.628784  | -1.785679 |
| C                                                | -3.166466 | 1.271067  | 0.091375  | C                     | -2.983060 | 1.584723  | 0.095838       | C  | -3.342806 | 1.016792  | 0.143426  |
| H                                                | -2.889066 | -0.505944 | -0.892427 | H                     | -2.914961 | -0.233636 | -0.845292      | H  | -2.943684 | -0.708225 | -0.889563 |
| H                                                | 1.399405  | -0.692551 | -1.758995 | H                     | 1.387719  | -0.735112 | -1.777540      | H  | 1.359717  | -0.560897 | -1.735275 |
| H                                                | 0.203470  | -0.933363 | -2.842053 | H                     | 0.172128  | -0.883041 | -2.854719      | H  | 0.208540  | -0.876501 | -2.848999 |
| C                                                | 0.542994  | -2.547798 | -1.642169 | C                     | 0.421528  | -2.536809 | -1.687346      | C  | 0.644570  | -2.477274 | -1.661726 |
| H                                                | 0.893150  | -0.574350 | 1.310072  | H                     | 0.919209  | -0.641768 | 1.285166       | H  | 0.872764  | -0.506081 | 1.271903  |
| C                                                | -0.671743 | -1.694524 | 2.014352  | C                     | -0.695883 | -1.673959 | 2.007125       | C  | -0.596222 | -1.731332 | 2.001341  |
| H                                                | -0.236853 | 0.292666  | 2.103683  | H                     | -0.138710 | 0.281041  | 2.113261       | H  | -0.297377 | 0.279459  | 2.094012  |
| H                                                | 1.521589  | 1.465883  | -0.979585 | H                     | 1.650636  | 1.392527  | -0.967620      | H  | 1.336828  | 1.556124  | -0.925518 |
| C                                                | 0.924054  | 2.771429  | 0.465439  | C                     | 1.158247  | 2.702167  | 0.511992       | C  | 0.579226  | 2.888056  | 0.422885  |
| H                                                | 0.392179  | 2.530809  | -1.488998 | H                     | 0.587044  | 2.539307  | -1.439241      | H  | 0.173088  | 2.522383  | -1.504929 |
| H                                                | -0.017790 | 3.193893  | 0.822247  | H                     | 0.250830  | 3.176992  | 0.891533       | H  | -0.404465 | 3.272158  | 0.701268  |
| C                                                | 1.933589  | 3.880684  | 0.220403  | C                     | 2.234582  | 3.748715  | 0.275575       | C  | 1.539026  | 4.041696  | 0.181746  |

|    |           |           |           |    |           |           |           |    |           |           |           |
|----|-----------|-----------|-----------|----|-----------|-----------|-----------|----|-----------|-----------|-----------|
| H  | 1.294286  | 2.112632  | 1.250637  | H  | 1.495270  | 2.003812  | 1.277708  | H  | 0.933460  | 2.291855  | 1.263803  |
| H  | -0.512075 | -2.496256 | 1.293387  | H  | -0.623503 | -2.467427 | 1.263033  | H  | -0.413990 | -2.514925 | 1.265770  |
| H  | -1.753700 | -1.581193 | 2.115865  | H  | -1.761591 | -1.486332 | 2.157812  | H  | -1.678588 | -1.687572 | 2.144069  |
| C  | -0.062215 | -2.085087 | 3.351151  | C  | -0.061054 | -2.138220 | 3.308116  | C  | 0.087526  | -2.094856 | 3.309549  |
| H  | -2.674549 | 2.243736  | 0.082580  | H  | -2.371762 | 2.487087  | 0.079809  | H  | -2.927866 | 2.024676  | 0.153861  |
| H  | -2.988917 | 0.845935  | 1.079000  | H  | -2.870056 | 1.154826  | 1.090891  | H  | -3.117715 | 0.581972  | 1.116988  |
| C  | -4.657573 | 1.435679  | -0.148220 | C  | -4.438983 | 1.933861  | -0.161820 | C  | -4.845554 | 1.071169  | -0.072200 |
| C  | -0.820747 | -3.201683 | -1.746772 | C  | -0.977745 | -3.106932 | -1.808675 | C  | -0.665475 | -3.229345 | -1.790072 |
| H  | 0.959976  | -2.691350 | -0.646331 | H  | 0.825613  | -2.723538 | -0.693344 | H  | 1.059458  | -2.602017 | -0.662518 |
| H  | 1.233602  | -3.032311 | -2.338530 | H  | 1.085478  | -3.047466 | -2.390910 | H  | 1.376754  | -2.901098 | -2.355337 |
| H  | -4.850937 | 1.884073  | -1.123494 | H  | -4.564853 | 2.387858  | -1.145571 | H  | -5.087822 | 1.528860  | -1.032118 |
| H  | -5.105701 | 2.078371  | 0.609340  | H  | -4.808008 | 2.640552  | 0.581297  | H  | -5.330518 | 1.656869  | 0.708505  |
| H  | -5.168332 | 0.472631  | -0.113936 | H  | -5.068354 | 1.044385  | -0.118992 | H  | -5.279792 | 0.070808  | -0.057710 |
| H  | 1.579139  | 4.569431  | -0.548574 | H  | 1.915750  | 4.475726  | -0.473536 | H  | 1.193276  | 4.672156  | -0.639234 |
| H  | 2.884123  | 3.463532  | -0.110035 | H  | 3.151495  | 3.278093  | -0.077264 | H  | 2.529278  | 3.666970  | -0.074716 |
| H  | 2.111479  | 4.456833  | 1.128773  | H  | 2.461513  | 4.292092  | 1.193167  | H  | 1.630337  | 4.668774  | 1.068970  |
| H  | -1.253728 | -3.051104 | -2.737520 | H  | -1.394736 | -2.916840 | -2.799495 | H  | -1.098334 | -3.097656 | -2.783505 |
| H  | -1.510454 | -2.786859 | -1.011090 | H  | -1.646912 | -2.661758 | -1.072078 | H  | -1.391530 | -2.876923 | -1.056840 |
| H  | -0.752370 | -4.275623 | -1.577223 | H  | -0.974185 | -4.185372 | -1.654590 | H  | -0.518939 | -4.297412 | -1.633584 |
| H  | 1.014946  | -2.215290 | 3.253697  | H  | 0.999783  | -2.338210 | 3.162135  | H  | 1.166409  | -2.151442 | 3.169868  |
| H  | -0.489928 | -3.017193 | 3.721781  | H  | -0.536351 | -3.048212 | 3.675756  | H  | -0.263443 | -3.057173 | 3.683612  |
| H  | -0.241283 | -1.313084 | 4.101267  | H  | -0.155931 | -1.374676 | 4.081815  | H  | -0.113730 | -1.344381 | 4.075732  |
| C  | 3.309234  | -0.303088 | -0.079437 | C  | 3.335173  | -0.498941 | -0.116127 | C  | 3.279694  | -0.119693 | -0.064907 |
| O  | 2.981205  | 0.232645  | -1.147069 | O  | 3.032869  | 0.077885  | -1.169696 | O  | 2.872040  | 0.449090  | -1.095073 |
| O  | 2.673177  | -0.787471 | 0.853282  | O  | 2.677215  | -0.961738 | 0.812490  | O  | 2.656550  | -0.656469 | 0.856135  |
|    |           |           |           | H  | -4.537490 | -1.961443 | 0.312522  | H  | 4.477056  | -0.151239 | 0.044106  |
|    |           |           |           | H  | -3.888762 | -2.074953 | 0.662875  | H  | 5.661967  | -0.175624 | 0.148996  |
|    | CHp1      |           |           |    | OHTS1     |           |           |    | OHp1      |           |           |
| Li | -0.495792 | 0.091458  | -0.524246 | Li | -0.532799 | 0.177195  | 0.050172  | Li | 0.381081  | 0.038615  | 0.353591  |
| N  | -2.554540 | 0.002909  | -0.905050 | N  | -2.508647 | 0.008149  | 0.721390  | N  | 2.085619  | -1.195846 | 0.518872  |
| N  | 0.632143  | -1.008854 | -1.882955 | N  | -0.159637 | -0.741761 | -1.777983 | N  | -0.584230 | -0.028381 | 2.199736  |
| N  | 0.319634  | 1.992238  | -0.740267 | N  | -0.015155 | 2.157117  | -0.316652 | N  | 1.053202  | 1.994559  | 0.084236  |
| N  | -0.070413 | -0.478089 | 1.399535  | N  | 0.773712  | -0.561687 | 1.462987  | N  | -0.743137 | -0.538002 | -1.307234 |
| H  | -2.744900 | 0.261520  | -1.866066 | H  | -2.643115 | -0.924692 | 1.094429  | H  | 2.718057  | -0.655785 | 1.099341  |
| C  | -3.350824 | 0.829926  | 0.007742  | C  | -3.535620 | 0.295350  | -0.287605 | C  | 2.770516  | -1.616507 | -0.708151 |
| H  | -2.822720 | -0.970549 | -0.817849 | H  | -2.611758 | 0.639926  | 1.507456  | H  | 1.828335  | -2.007224 | 1.069262  |
| H  | 1.475319  | -0.448590 | -1.705826 | H  | 0.706287  | -0.224960 | -1.932452 | H  | -0.970367 | 0.919305  | 2.253635  |
| H  | 0.394140  | -0.870587 | -2.858474 | H  | -0.784459 | -0.470967 | -2.529205 | H  | 0.093652  | -0.051182 | 2.957229  |
| C  | 0.941220  | -2.424560 | -1.655444 | C  | 0.117686  | -2.181343 | -1.870552 | C  | -1.649101 | -1.001428 | 2.484622  |
| H  | 0.949479  | -0.423282 | 1.240871  | H  | 1.636197  | -0.589667 | 0.905534  | H  | -1.525385 | 0.116337  | -1.322597 |
| C  | -0.389208 | -1.780811 | 1.987431  | C  | 0.569548  | -1.877564 | 2.078339  | C  | -1.281124 | -1.898951 | -1.425908 |
| H  | -0.289276 | 0.248667  | 2.071751  | H  | 0.946371  | 0.118646  | 2.194904  | H  | -0.195042 | -0.326055 | -2.134209 |
| H  | 1.264969  | 1.623175  | -0.913347 | H  | 0.903165  | 1.943809  | -0.706931 | H  | 0.480679  | 2.366504  | -0.667134 |
| C  | 0.378079  | 2.916913  | 0.395087  | C  | 0.127790  | 3.121115  | 0.779684  | C  | 2.458268  | 2.357147  | -0.125182 |
| H  | 0.054582  | 2.503882  | -1.574175 | H  | -0.529354 | 2.590167  | -1.076221 | H  | 0.701127  | 2.468126  | 0.918790  |
| H  | -0.636711 | 3.233400  | 0.646497  | H  | -0.856811 | 3.289443  | 1.220717  | H  | 3.022444  | 2.006294  | 0.740637  |
| C  | 1.259190  | 4.134264  | 0.164384  | C  | 0.748626  | 4.447613  | 0.374627  | C  | 2.707573  | 3.842791  | -0.327193 |
| H  | 0.753332  | 2.356210  | 1.251228  | H  | 0.736262  | 2.651582  | 1.553518  | H  | 2.830509  | 1.798433  | -0.985638 |
| H  | -0.152106 | -2.545533 | 1.247457  | H  | 0.386927  | -2.592943 | 1.275750  | H  | -1.893006 | -2.086684 | -0.544076 |
| H  | -1.467647 | -1.838148 | 2.155818  | H  | -0.343141 | -1.844792 | 2.677630  | H  | -0.448812 | -2.603984 | -1.381645 |
| C  | 0.356038  | -2.078271 | 3.278930  | C  | 1.734339  | -2.354999 | 2.930204  | C  | -2.104294 | -2.138575 | -2.680290 |
| H  | -3.011676 | 1.859799  | -0.103665 | H  | -3.383789 | -0.398383 | -1.113960 | H  | 3.006922  | -0.717454 | -1.277238 |
| H  | -3.095364 | 0.531545  | 1.024548  | H  | -3.338763 | 1.292533  | -0.681391 | H  | 2.055791  | -2.181490 | -1.306736 |
| C  | -4.853391 | 0.747035  | -0.200927 | C  | -4.965872 | 0.205142  | 0.215748  | C  | 4.029185  | -2.438150 | -0.487348 |
| C  | -0.289516 | -3.297015 | -1.807866 | C  | -1.124069 | -3.003268 | -1.588512 | C  | -1.104485 | -2.414773 | 2.540873  |
| H  | 1.345683  | -2.507595 | -0.647680 | H  | 0.896636  | -2.409883 | -1.144269 | H  | -2.393632 | -0.921374 | 1.692646  |
| H  | 1.724193  | -2.780195 | -2.332318 | H  | 0.519471  | -2.450871 | -2.851213 | H  | -2.162517 | -0.768516 | 3.421209  |
| H  | -5.128152 | 1.068735  | -1.206276 | H  | -5.187921 | -0.795854 | 0.587419  | H  | 4.767036  | -1.876527 | 0.086535  |
| H  | -5.381493 | 1.383342  | 0.509076  | H  | -5.674123 | 0.429894  | -0.581373 | H  | 4.485562  | -2.715921 | -1.437275 |
| H  | -5.211913 | -0.274049 | -0.065243 | H  | -5.141483 | 0.912167  | 1.027431  | H  | 3.806998  | -3.356030 | 0.058075  |
| H  | 0.888824  | 4.731389  | -0.670778 | H  | 0.135128  | 4.952498  | -0.372636 | H  | 2.362591  | 4.412571  | 0.534990  |
| H  | 2.278591  | 3.827577  | -0.066993 | H  | 1.737447  | 4.295453  | -0.056645 | H  | 2.174798  | 4.211387  | -1.204251 |
| H  | 1.285492  | 4.774262  | 1.046897  | H  | 0.846527  | 5.112287  | 1.233388  | H  | 3.769981  | 4.044945  | -0.468078 |
| H  | -0.711933 | -3.208679 | -2.810608 | H  | -1.915184 | -2.778608 | -2.306049 | H  | -0.357461 | -2.514968 | 3.329883  |
| H  | -1.060888 | -3.011456 | -1.092012 | H  | -1.508727 | -2.799698 | -0.588807 | H  | -0.640579 | -2.695650 | 1.595192  |
| H  | -0.047455 | -4.346499 | -1.643309 | H  | -0.909377 | -4.068793 | -1.658588 | H  | -1.900959 | -3.128217 | 2.749980  |
| H  | 1.431446  | -2.026842 | 3.113034  | H  | 2.646503  | -2.398038 | 2.336349  | H  | -2.948884 | -1.451615 | -2.717981 |
| H  | 0.109617  | -3.070839 | 3.657927  | H  | 1.541627  | -3.346984 | 3.339706  | H  | -2.490486 | -3.157733 | -2.706662 |
| H  | 0.099604  | -1.351463 | 4.051715  | H  | 1.909006  | -1.675948 | 3.766166  | H  | -1.502543 | -1.985858 | -3.577659 |

|    |           |           |           |    |           |           |           |    |                   |           |           |
|----|-----------|-----------|-----------|----|-----------|-----------|-----------|----|-------------------|-----------|-----------|
| C  | 3.339995  | 0.137219  | -0.043087 | C  | 3.354023  | 0.085006  | -1.052223 | C  | -3.165343         | 1.857551  | -0.204492 |
| O  | 2.865101  | 0.676579  | -1.073615 | O  | 2.404187  | 0.820813  | -1.525701 | O  | -1.946893         | 2.294569  | 0.059220  |
| O  | 2.714918  | -0.441429 | 0.864939  | O  | 3.215904  | -0.723631 | -0.145682 | O  | -3.377290         | 1.037634  | -1.059699 |
| H  | -2.526171 | -0.269006 | 3.680914  | H  | 4.330810  | 0.228643  | -1.532659 | H  | -3.954919         | 2.295151  | 0.415760  |
| H  | 4.443099  | 0.180590  | 0.062692  | H  | 2.796687  | 1.549948  | -2.473923 | H  | -1.917015         | 2.868797  | 0.880228  |
|    | eTS2      |           |           |    | rFA       |           |           |    | H <sub>2</sub> r2 |           |           |
| Li | -0.271453 | 0.322268  | -0.252884 | Li | -0.469055 | 0.056369  | -0.510575 | Li | 0.607219          | 0.227580  | -0.381020 |
| N  | -1.866015 | 1.708684  | -0.127434 | N  | -2.485913 | -0.507503 | -0.701270 | N  | -0.030268         | -0.499786 | 1.443345  |
| N  | -0.241663 | -1.023081 | -1.851167 | N  | 0.726905  | -0.858126 | -1.932409 | N  | 0.967859          | -1.350739 | -1.683972 |
| N  | 1.399594  | 1.520663  | -0.635022 | N  | -0.204110 | 2.100978  | -0.778681 | N  | -0.993684         | 1.232196  | -1.246825 |
| H  | 2.048046  | 0.781691  | -0.911722 | H  | 0.814961  | 1.930603  | -0.767533 | N  | 2.214406          | 1.563696  | -0.169399 |
| C  | 1.984911  | 2.300667  | 0.463488  | C  | -0.546807 | 3.096861  | 0.235702  | H  | -0.626354         | -1.164150 | 0.921274  |
| H  | 1.306671  | 2.116175  | -1.450686 | H  | -0.420508 | 2.470645  | -1.697068 | C  | -0.859940         | 0.278550  | 2.363977  |
| H  | 1.260663  | 3.058635  | 0.770062  | H  | -1.631413 | 3.226434  | 0.255764  | H  | 0.629598          | -1.057646 | 1.972229  |
| C  | 3.314440  | 2.953835  | 0.128466  | C  | 0.130096  | 4.445554  | 0.045534  | H  | 0.864217          | -1.061363 | -0.694870 |
| H  | -0.485766 | -0.583776 | -2.731877 | H  | 0.500738  | -0.690294 | -2.905508 | H  | 0.048914          | -1.727314 | -1.388866 |
| C  | -0.879814 | -2.345664 | -1.782157 | C  | 1.254518  | -2.215329 | -1.781494 | C  | 1.976649          | -2.410788 | -1.601395 |
| H  | 0.615623  | -1.329785 | 1.481777  | H  | 1.217576  | -0.273125 | 1.236906  | H  | 2.472510          | 1.915470  | -1.083850 |
| C  | -1.331063 | -1.284253 | 2.113295  | C  | -0.022841 | -1.722461 | 1.975823  | C  | 3.384910          | 0.980915  | -0.494787 |
| H  | 0.236400  | 0.015256  | 2.278479  | H  | -0.061399 | 0.313429  | 2.049090  | H  | 1.876239          | 2.360789  | 0.357161  |
| H  | 2.114535  | 1.626649  | 1.308919  | H  | -0.267627 | 2.687277  | 1.207705  | H  | -0.970335         | 1.138693  | -2.255939 |
| H  | -1.618273 | -2.062842 | 1.406423  | H  | 0.317898  | -2.468917 | 1.257865  | C  | -1.288200         | 2.621092  | -0.892106 |
| H  | -2.143674 | -0.555459 | 2.117761  | H  | -1.100154 | -1.868402 | 2.084762  | H  | -1.756453         | 0.623200  | -0.973777 |
| H  | -2.743032 | -1.753628 | -2.707499 | H  | -0.271787 | -3.193678 | -2.963221 | H  | -1.314840         | 2.686006  | 0.196382  |
| H  | -2.745559 | -1.647254 | -0.946548 | H  | -0.615916 | -3.150711 | -1.233951 | C  | -2.588429         | 3.161834  | -1.466457 |
| H  | -2.850927 | -3.219789 | -1.740389 | H  | 0.589183  | -4.272722 | -1.870119 | H  | -0.454177         | 3.246553  | -1.218501 |
| H  | -0.373874 | -2.630398 | 3.504457  | H  | 1.741944  | -1.824545 | 3.213737  | H  | 3.696907          | 0.116732  | -0.091323 |
| H  | -2.091342 | -2.359047 | 3.829680  | H  | 0.468252  | -2.495311 | 3.691952  | H  | 3.053609          | 0.595476  | 1.458752  |
| C  | -1.166444 | -1.883352 | 3.499885  | C  | 0.664467  | -1.949676 | 3.313132  | C  | 4.552349          | 1.934566  | 0.684950  |
| H  | -3.527500 | 0.524661  | 0.254522  | H  | -3.286949 | 1.164035  | 0.224454  | H  | -1.631582         | 0.768999  | 1.771105  |
| H  | -3.322117 | 0.981290  | -1.415838 | H  | -3.057029 | -0.213844 | 1.269435  | H  | -0.251419         | 1.068936  | 2.810983  |
| C  | -4.252720 | 2.498319  | -0.203237 | C  | -4.862656 | -0.299358 | 0.100261  | C  | -1.519802         | -0.545200 | 3.458317  |
| N  | -0.126930 | -0.628952 | 1.580430  | N  | 0.213225  | -0.403322 | 1.386971  | C  | 2.081598          | -2.945028 | -0.185898 |
| H  | -1.773789 | 2.047670  | 0.824245  | H  | -2.758203 | -0.240719 | -1.640108 | H  | 2.941045          | -2.007709 | -1.919394 |
| C  | -3.266236 | 1.359300  | -0.395478 | C  | -3.402499 | 0.081769  | 0.278584  | H  | 1.744397          | -3.240675 | -2.276614 |
| H  | -1.585538 | 2.480618  | -0.721748 | H  | -2.538314 | -1.518898 | -0.670287 | H  | -2.157349         | -1.312800 | 3.021622  |
| H  | 0.771395  | -1.141234 | -1.868564 | H  | 1.460430  | -0.174190 | -1.666345 | H  | -2.134495         | 0.080285  | 4.106491  |
| C  | -2.390597 | -2.234154 | -1.792797 | C  | 0.178667  | -3.268201 | -1.971778 | H  | -0.770728         | -1.038930 | 4.080225  |
| H  | -0.543759 | -2.822533 | -0.861437 | H  | 1.680389  | -2.287664 | -0.781104 | H  | -3.434892         | 2.567462  | -1.124259 |
| H  | -0.554234 | -2.990417 | -2.603421 | H  | 2.078263  | -2.409230 | -2.475693 | H  | -2.575167         | 3.130763  | -2.556880 |
| H  | -4.229479 | 2.867961  | 0.822547  | H  | -5.232663 | 0.014845  | -0.876463 | H  | -2.753716         | 4.195907  | -1.162250 |
| H  | -5.270387 | 2.172831  | -0.417888 | H  | -5.485234 | 0.172207  | 0.860578  | H  | 1.114043          | -3.317696 | 0.148983  |
| H  | -4.022090 | 3.332958  | -0.866472 | H  | -4.998400 | -1.378708 | 0.179153  | H  | 2.401925          | -2.162582 | 0.502716  |
| H  | 3.213993  | 3.641747  | -0.713005 | H  | -0.159841 | 4.894895  | -0.905637 | H  | 2.802486          | -3.760173 | -0.131773 |
| H  | 4.052458  | -0.719108 | -0.133544 | H  | 1.213394  | 4.330741  | 0.045005  | H  | 4.913114          | 2.308888  | -0.273956 |
| H  | 3.696460  | 3.518515  | 0.979200  | H  | -0.142244 | 5.140423  | 0.840929  | H  | 5.384488          | 1.437710  | 1.183574  |
| H  | -0.902686 | -1.115489 | 4.228211  | H  | 0.311783  | -1.235303 | 4.058708  | H  | 4.262581          | 2.792408  | 1.293115  |
| C  | 3.121435  | -1.532851 | -0.381130 | C  | 3.431586  | 0.700638  | -0.216801 | C  | -2.583777         | -1.841748 | -0.883971 |
| O  | 3.587756  | -0.719108 | 0.578132  | O  | 3.146083  | -0.187000 | 0.899946  | O  | -3.177580         | -0.625923 | -0.339025 |
| O  | 2.701370  | -1.069906 | -1.430327 | O  | 2.376127  | 1.087334  | -0.833642 | O  | -1.408967         | -2.075137 | -0.432752 |
| H  | 3.757793  | -1.241871 | 1.388340  | H  | 3.982361  | -0.554095 | 1.195958  | H  | -4.034829         | -0.522570 | -0.761767 |
| H  | 3.252956  | -2.596951 | -0.197426 | H  | 4.182064  | 1.448076  | 0.086267  | H  | -3.334831         | -2.647378 | -0.886917 |
|    | CHTS2     |           |           |    | CHp2      |           |           |    | OHTS2             |           |           |
| Li | 0.624566  | 0.395461  | -0.451573 | Li | 0.342358  | 0.040573  | -0.366567 | Li | -0.534747         | -0.059812 | -0.325228 |
| C  | -2.489942 | -1.893297 | -0.641074 | N  | -0.697618 | -1.291526 | -1.598395 | O  | 2.124613          | 1.541679  | -0.787917 |
| H  | -2.548581 | -1.626189 | -1.784614 | N  | 0.097659  | -0.303071 | 1.656885  | H  | 2.272213          | 1.669855  | -2.270755 |
| H  | -2.555270 | -1.131633 | -3.036016 | N  | 2.345128  | 0.239830  | -0.993055 | N  | -2.402464         | -1.024778 | -0.259501 |
| N  | -0.025682 | -0.266766 | 1.419158  | N  | -0.647235 | 1.833859  | -0.668852 | N  | 0.649633          | -0.800018 | -1.844389 |
| N  | 0.942686  | -1.297646 | -1.617922 | C  | -3.369099 | -0.519643 | 0.575353  | N  | -0.641923         | 1.979436  | -0.640084 |
| N  | -1.105833 | 1.243170  | -1.238335 | O  | -3.496775 | -0.595690 | -0.879534 | H  | 0.386473          | 2.025751  | -0.634297 |
| N  | 2.277358  | 1.686468  | -0.274112 | O  | -2.509975 | 0.432287  | 0.971786  | C  | -1.187660         | 2.937977  | 0.320297  |
| H  | -0.565592 | -1.026655 | 0.938838  | H  | -3.904106 | 0.233084  | -1.148508 | H  | -0.917608         | 2.247380  | -1.182420 |
| C  | -0.978031 | 0.475389  | 2.269158  | H  | 0.499791  | 0.434119  | 2.225349  | H  | -2.275782         | 2.845514  | 0.333398  |
| H  | 0.623274  | -0.768602 | 2.034119  | C  | 0.258825  | -1.580194 | 2.353537  | C  | -0.795632         | 4.383770  | 0.057354  |
| H  | 0.815048  | -1.147059 | -2.623330 | H  | -0.908617 | -0.068526 | 1.558560  | H  | 0.332697          | -0.605415 | -2.787468 |
| H  | 0.023181  | -1.667566 | -1.261955 | H  | -0.942750 | 2.024558  | -1.619445 | C  | 1.287390          | -2.117832 | -1.817917 |
| C  | 1.933950  | -2.374651 | -1.418070 | C  | -0.235152 | 3.088247  | -0.033720 | H  | 1.464432          | -0.241931 | 1.075752  |



|   |           |           |           |  |  |
|---|-----------|-----------|-----------|--|--|
| H | -5.232663 | 0.014845  | -0.876463 |  |  |
| H | -5.485234 | 0.172207  | 0.860578  |  |  |
| H | -4.998400 | -1.378708 | 0.179153  |  |  |
| H | -0.159841 | 4.894895  | -0.905637 |  |  |
| H | 1.213394  | 4.330741  | 0.045005  |  |  |
| H | -0.142244 | 5.140423  | 0.840929  |  |  |
| H | 0.311783  | -1.235303 | 4.058708  |  |  |
| C | 3.431586  | 0.700638  | -0.216801 |  |  |
| O | 3.146083  | -0.187000 | 0.899946  |  |  |
| O | 2.376127  | 1.087334  | -0.833642 |  |  |
| H | 3.982361  | -0.554095 | 1.195958  |  |  |
| H | 4.182064  | 1.448076  | 0.086267  |  |  |

**Table S4.** Cartesian Coordinates (Å) for the reactants, products, and intermediates of the  $\text{Li}(\text{H}_2\text{O})_4 + \text{CO}_2 + 2\text{H}_2 \rightarrow \text{Li}(\text{H}_2\text{O})_4 + \text{CH}_2(\text{OH})_2$  reaction pathway.

| Li(H <sub>2</sub> O) <sub>4</sub> |           |           |           | CO <sub>2</sub> r |           |           | eTS1              |    |           |           |           |
|-----------------------------------|-----------|-----------|-----------|-------------------|-----------|-----------|-------------------|----|-----------|-----------|-----------|
| Li                                | 0.000560  | -0.194855 | -0.006648 | Li                | -1.419941 | 0.127168  | -0.012298         | Li | -1.282195 | 0.192923  | 0.059348  |
| O                                 | 1.026615  | 1.006907  | -1.144121 | O                 | -0.522047 | 1.808139  | -0.221029         | O  | -0.614643 | -0.089939 | 1.843150  |
| O                                 | -1.572955 | -1.070356 | -0.702400 | O                 | -2.660465 | 0.014021  | 1.473059          | O  | -0.661779 | -1.307243 | -1.035224 |
| O                                 | 1.567894  | -1.106131 | 0.656081  | O                 | -2.526795 | -0.496281 | -1.469007         | O  | -3.163448 | -0.209424 | -0.170910 |
| O                                 | -1.022291 | 0.957655  | 1.185178  | O                 | 0.032747  | -1.173148 | 0.207921          | O  | -0.557957 | 1.883465  | -0.477871 |
| H                                 | 0.983959  | 1.910799  | -0.771353 | H                 | 0.439306  | 1.723885  | -0.163946         | H  | -0.095804 | 0.614627  | 2.257662  |
| H                                 | 0.860917  | 1.116278  | -2.092665 | H                 | -0.766104 | 2.616390  | 0.236901          | H  | -0.116812 | -0.908647 | 2.001275  |
| H                                 | -1.804007 | -1.256686 | -1.617762 | H                 | -3.521111 | -0.285916 | 1.147097          | H  | -0.328418 | -1.130874 | -1.929445 |
| H                                 | -2.277313 | -0.515613 | -0.340989 | H                 | -2.396156 | -0.646786 | 2.132041          | H  | 0.027071  | -1.850239 | -0.610645 |
| H                                 | -0.972861 | 1.877925  | 0.855679  | H                 | -0.033660 | -1.643487 | 1.059726          | H  | 0.413303  | 1.850297  | -0.478856 |
| H                                 | -0.853943 | 1.020797  | 2.137553  | H                 | -0.085494 | -1.878570 | -0.456705         | H  | -0.819817 | 2.411051  | -1.239701 |
| H                                 | 2.278097  | -0.538712 | 0.327319  | H                 | -2.387531 | -0.298202 | -2.403951         | H  | -3.142382 | -1.094890 | -0.555293 |
| H                                 | 1.789355  | -1.334817 | 1.564263  | H                 | -2.633168 | 0.002353  | -1.413070         | H  | -3.794758 | -0.234944 | 0.554620  |
|                                   |           |           |           | C                 | 2.763058  | 0.002353  | -0.000235         | C  | 2.437951  | -0.108239 | -0.062958 |
|                                   |           |           |           | O                 | 3.269571  | -1.027304 | 0.080562          | O  | 2.383966  | -1.264261 | 0.055879  |
|                                   |           |           |           | O                 | 2.290164  | 1.059483  | -0.083979         | O  | 2.248423  | 1.039186  | -0.190023 |
| CO <sub>2</sub> p                 |           |           |           | H <sub>2</sub> r1 |           |           | CHTS1             |    |           |           |           |
| Li                                | 1.342405  | 0.002613  | 0.001085  | Li                | -1.452586 | 0.181478  | 0.012432          | Li | -1.488532 | 0.000010  | 0.000014  |
| O                                 | 0.278070  | 1.333320  | -0.884002 | O                 | -0.687395 | -1.369048 | -0.821877         | O  | -0.410423 | 1.334324  | 0.855900  |
| O                                 | 2.228056  | -1.448336 | -0.966983 | O                 | -2.065752 | 1.730301  | -1.009970         | O  | -2.361495 | -1.451296 | 0.978651  |
| O                                 | 2.197767  | 1.463950  | 0.981827  | O                 | -2.563218 | -1.032012 | 1.068406          | O  | -2.361557 | 1.451343  | -0.978530 |
| O                                 | 0.281096  | -1.339504 | 0.871533  | O                 | -0.127458 | 1.322437  | 0.803601          | O  | -0.410524 | -1.334340 | -0.855968 |
| H                                 | -0.713223 | 1.243050  | -0.659748 | H                 | 0.305266  | -1.464547 | -0.614483         | H  | 0.584333  | 1.228490  | 0.642817  |
| H                                 | 0.317566  | 1.619821  | -1.798226 | H                 | -0.798886 | -1.677651 | -1.722927         | H  | -0.455315 | 1.649506  | -1.760236 |
| H                                 | 2.436212  | -1.686548 | -1.872211 | H                 | -2.267476 | 1.966168  | -1.917252         | H  | -2.576065 | -1.686430 | 1.883136  |
| H                                 | 1.582984  | -2.085121 | -0.628857 | H                 | -1.304974 | 2.254513  | -0.724484         | H  | -1.704233 | -2.080898 | 0.650728  |
| H                                 | -0.709630 | -1.252026 | 0.642983  | H                 | 0.820123  | 1.038372  | 0.563941          | H  | 0.584233  | -1.228559 | -0.642924 |
| H                                 | 0.315363  | -1.626346 | 1.785905  | H                 | -0.083741 | 1.653412  | 1.702588          | H  | -0.455467 | -1.649572 | -1.760283 |
| H                                 | 1.550477  | 2.092180  | 0.632270  | H                 | -2.067374 | -1.799342 | 0.751160          | H  | -1.704247 | 2.080908  | -0.650630 |
| H                                 | 2.386442  | 1.704368  | 1.890745  | H                 | -2.793605 | -1.184262 | 1.986692          | H  | -2.576186 | 1.686518  | -1.882990 |
| C                                 | -2.672577 | -0.003949 | 0.000677  | C                 | 2.496558  | -0.594854 | -0.060920         | C  | 2.566840  | -0.000016 | -0.000110 |
| O                                 | -2.189438 | -1.093518 | 0.314746  | O                 | 2.243583  | 0.581030  | 0.213292          | O  | 2.062094  | -1.071154 | -0.357329 |
| O                                 | -2.190293 | 1.084897  | -0.317142 | O                 | 1.802663  | -1.579639 | -0.315184         | O  | 2.062124  | 1.071087  | 0.357230  |
|                                   |           |           |           | H                 | 4.124118  | 2.231015  | 0.365364          | H  | 3.844616  | 0.000196  | 0.000165  |
|                                   |           |           |           | H                 | 4.625575  | 2.782465  | 0.431482          | H  | 4.881140  | 0.000200  | 0.000730  |
| CHp1                              |           |           |           | OHTS1             |           |           | OHp1              |    |           |           |           |
| Li                                | -1.517215 | 0.000167  | -0.000005 | Li                | -1.272884 | 0.260471  | 0.088888          | Li | -1.569269 | 0.230672  | -0.009476 |
| O                                 | -0.427068 | 1.316435  | 0.858182  | O                 | -0.517842 | -1.588213 | 0.266406          | O  | -0.327504 | 1.681950  | 0.041301  |
| O                                 | -2.363757 | -1.494461 | 0.957723  | O                 | -0.508191 | 0.916192  | 1.755901          | O  | -3.035478 | 0.282337  | -1.273540 |
| O                                 | -2.362658 | 1.495414  | -0.957762 | O                 | -0.806306 | 1.602782  | -1.185460         | O  | -0.486196 | -1.448695 | -0.351128 |
| O                                 | -0.427751 | -1.316775 | -0.858015 | O                 | -2.967634 | -0.635138 | -0.317727         | O  | -2.523676 | -0.161045 | 1.627590  |
| H                                 | 0.581820  | 1.189643  | 0.639670  | H                 | 0.447839  | -1.602153 | 0.028099          | H  | 0.603622  | 1.405920  | -0.010049 |
| H                                 | -0.465982 | 1.641546  | 1.758869  | H                 | -0.550059 | -1.863923 | 1.186711          | H  | -0.400789 | 2.546126  | -0.368781 |
| H                                 | -2.478840 | -1.750190 | 1.874607  | H                 | 0.419976  | 0.843623  | 1.451100          | H  | -2.984742 | -0.400913 | -1.957509 |
| H                                 | -1.669792 | -2.052359 | 0.573458  | H                 | -0.613357 | 1.819152  | 2.066328          | H  | -3.856249 | 0.104178  | -0.795299 |
| H                                 | 0.581119  | -1.190135 | -0.639802 | H                 | -2.590673 | -1.505661 | -0.494492         | H  | -2.261163 | 0.137469  | 2.506706  |
| H                                 | -0.467039 | -1.642135 | -1.758592 | H                 | -3.728731 | -0.515251 | -0.888529         | H  | -2.671290 | -1.120827 | 1.700973  |
| H                                 | -1.668674 | 2.052814  | -0.572780 | H                 | 0.074160  | 2.041329  | -1.021921         | H  | -0.738578 | -1.874646 | -1.197463 |
| H                                 | -2.477262 | 1.751827  | -1.874515 | H                 | -0.976611 | 1.701674  | -2.126350         | H  | -0.770254 | -2.100139 | 0.333130  |
| C                                 | 2.560877  | -0.000451 | 0.000047  | C                 | 2.361720  | -0.184000 | -0.412623         | C  | 3.064278  | -0.421165 | -0.011058 |
| O                                 | 2.013339  | -1.056921 | -0.381922 | O                 | 1.798210  | 0.745395  | 0.293778          | O  | 1.792313  | -0.021613 | -0.146294 |
| O                                 | 2.013705  | 1.056347  | 0.381323  | O                 | 2.037067  | -1.361293 | -0.392189         | O  | 3.964505  | 0.343567  | 0.121519  |
| H                                 | 3.665420  | -0.000922 | 0.000574  | H                 | 3.161750  | 0.156990  | -1.080257         | H  | 3.182228  | -1.513375 | -0.037406 |
| H                                 | 6.019130  | 0.001814  | 0.002009  | H                 | 1.721590  | 1.808994  | -0.277298         | H  | 1.147636  | -0.760828 | -0.235117 |
| eTS2                              |           |           |           | rFA               |           |           | H <sub>2</sub> r2 |    |           |           |           |
| Li                                | 1.567421  | 0.644996  | 0.106471  | Li                | -1.406507 | 0.329770  | 0.132365          | Li | 1.628071  | -0.126637 | 0.437149  |
| C                                 | -2.077298 | -0.259321 | -0.411662 | O                 | -0.423398 | -0.253536 | 1.718517          | O  | 1.061686  | 1.726614  | 0.251889  |
| O                                 | -3.161687 | 0.148855  | 0.271419  | O                 | -0.709806 | -0.772406 | -1.396898         | O  | 0.625385  | -0.917082 | -1.150271 |
| O                                 | -1.378407 | -1.158912 | 0.034644  | O                 | -3.007919 | -0.835311 | 0.082207          | O  | 3.250491  | -0.421780 | -0.629360 |
| H                                 | -1.972490 | 0.154896  | -1.411430 | O                 | -0.720729 | 2.107279  | -0.098316         | O  | 0.545533  | -0.663277 | 1.940683  |
| H                                 | -3.505858 | 0.949799  | -0.148399 | C                 | 2.080942  | 0.129574  | 0.274725          | C  | -2.403444 | 0.323012  | -0.042417 |
| O                                 | 0.500039  | -0.107404 | 1.581998  | O                 | 2.666896  | -1.091023 | -0.068145         | O  | -2.823208 | -0.960759 | -0.413586 |
| O                                 | 0.434526  | 2.077764  | -0.411668 | O                 | 1.279148  | 0.597145  | -0.636944         | O  | -1.118555 | 0.365039  | 0.227612  |





**Table S5.** Cartesian Coordinates (Å) for the reactants, products, and intermediates of the  $\text{Li}(\text{CH}_3\text{OH})_4 + \text{CO}_2 + 2\text{H}_2 \rightarrow \text{Li}(\text{CH}_3\text{OH})_4 + \text{CH}_2(\text{OH})_2$  reaction pathway.

| $\text{Li}(\text{CH}_3\text{OH})_4$ |           |           | $\text{CO}_2\text{r}$ |    |           | eTS1          |           |    |           |           |           |
|-------------------------------------|-----------|-----------|-----------------------|----|-----------|---------------|-----------|----|-----------|-----------|-----------|
| Li                                  | -0.129803 | -0.018199 | -0.157710             | Li | 0.914551  | 0.053528      | -0.095252 | Li | -0.798463 | 0.128865  | 0.156585  |
| O                                   | 0.757703  | 0.887076  | 1.307827              | O  | 0.015450  | -0.885480     | -1.497297 | O  | -0.133779 | -1.107960 | 1.462364  |
| O                                   | -1.811108 | 0.922064  | -0.261251             | O  | 0.747882  | -0.788801     | 1.677783  | O  | -0.674967 | -0.662942 | -1.657411 |
| O                                   | 1.144498  | -0.099050 | -1.608058             | O  | 2.846871  | -0.007378     | 0.106042  | O  | -2.711796 | 0.325482  | -0.152629 |
| O                                   | -0.664291 | -1.709513 | 0.583500              | O  | -0.027305 | 1.690230      | 0.093965  | O  | 0.367458  | 1.622378  | 0.000000  |
| H                                   | 0.172737  | 0.620567  | 2.051503              | H  | -0.925699 | -0.711573     | -1.365376 | H  | 0.797059  | -1.253982 | 1.216583  |
| C                                   | 1.014292  | 2.286535  | 1.399257              | C  | 0.198456  | -2.163602     | -2.090881 | C  | -0.657342 | -2.242719 | 2.140729  |
| C                                   | -2.965292 | 0.661169  | -1.053901             | C  | 0.389687  | -2.136428     | 1.981160  | C  | -0.380622 | -2.022195 | -1.986448 |
| H                                   | -2.062689 | 0.895758  | 0.688766              | H  | 0.175251  | -0.176004     | 2.200318  | H  | -0.037879 | -0.067987 | -2.148879 |
| C                                   | 0.074035  | -2.873258 | 0.938408              | C  | 0.066504  | 3.026076      | -0.389629 | C  | 0.773858  | 2.830670  | 0.640397  |
| H                                   | -1.217623 | -1.426361 | 1.346161              | H  | -0.499129 | 1.676966      | 0.961325  | H  | 0.725290  | 1.597965  | -0.933212 |
| C                                   | 2.557517  | -0.053177 | -1.403559             | C  | 3.929976  | 0.873995      | -0.162961 | C  | -3.637774 | 1.396305  | 0.001207  |
| H                                   | 0.947376  | -0.259815 | -2.532801             | H  | 2.781484  | -0.193425     | 1.052254  | H  | -2.594003 | 0.109767  | -1.095526 |
| H                                   | 1.601524  | 2.567095  | 0.528485              | H  | 1.268579  | -2.339361     | -2.156847 | H  | -1.724093 | -2.057068 | 2.310213  |
| H                                   | 1.581761  | 2.516433  | 2.300853              | H  | -0.225944 | -2.191155     | -3.094537 | H  | -0.161892 | -2.383522 | 3.112717  |
| H                                   | 0.085405  | 2.857189  | 1.400059              | H  | -0.253681 | -2.950318     | -1.485853 | H  | -0.547298 | -3.156271 | 1.537159  |
| H                                   | -2.663409 | 0.718709  | -2.096482             | H  | -0.664854 | -2.316137     | 1.769655  | H  | 0.666996  | -2.262506 | -1.753371 |
| H                                   | -3.736701 | 1.408516  | -0.869526             | H  | 0.588317  | -2.361108     | 3.028662  | H  | -0.572325 | -2.214646 | -3.051746 |
| H                                   | -3.368104 | -0.331597 | -0.850214             | H  | 0.998926  | -2.783968     | 1.355943  | H  | -1.042532 | -2.655566 | -1.383674 |
| H                                   | 0.709630  | -3.124833 | 0.093401              | H  | 0.643939  | 3.650374      | 0.292953  | H  | 0.386432  | 3.708705  | 0.103068  |
| H                                   | -0.595345 | -3.709874 | 1.138462              | H  | -0.924831 | 3.460376      | -0.519003 | H  | 1.870855  | 2.889219  | 0.692239  |
| H                                   | 0.697256  | -2.693678 | 1.815400              | H  | 0.565574  | 2.991494      | -1.354227 | H  | 0.364286  | 2.820071  | 1.656837  |
| H                                   | 2.710696  | 0.120245  | -0.342963             | H  | 3.937360  | 1.055586      | -1.233928 | H  | -3.702627 | 1.614434  | 1.073274  |
| H                                   | 3.006067  | 0.761672  | -1.971259             | H  | 4.879912  | 0.422595      | 0.123155  | H  | -4.635744 | 1.109139  | -0.361394 |
| H                                   | 3.023099  | -0.997653 | -1.684082             | H  | 3.806710  | 1.823939      | 0.357874  | H  | -3.297771 | 2.298827  | -0.528213 |
|                                     |           |           |                       | O  | -3.390876 | 0.151016      | 0.079211  | C  | 2.886698  | -0.053346 | -0.189907 |
|                                     |           |           |                       | O  | -2.732917 | -0.526978     | -0.600697 | O  | 2.347517  | -1.056530 | 0.110656  |
|                                     |           |           |                       | O  | -4.107238 | 0.802755      | 0.701702  | O  | 3.554533  | 0.887639  | -0.331943 |
|                                     |           |           |                       |    |           |               |           |    |           |           |           |
| $\text{CO}_2\text{p}$               |           |           | $\text{H}_2\text{r1}$ |    |           | CHTS1         |           |    |           |           |           |
| Li                                  | 0.690489  | -0.146816 | 0.380714              | Li | 0.812921  | 0.292884      | -0.228045 | Li | -0.816423 | -0.254993 | -0.302459 |
| O                                   | 0.300454  | -0.469809 | -1.495040             | O  | 0.256602  | -0.413003     | 1.494257  | O  | -0.335803 | 0.101028  | 1.548787  |
| O                                   | -0.605917 | -1.162963 | 1.335729              | O  | -0.226550 | 1.870357      | -0.470284 | O  | 0.392320  | -1.617644 | -0.844904 |
| O                                   | 2.581323  | -0.490323 | 0.620861              | O  | 2.746674  | 0.382665      | -0.192637 | O  | -2.732466 | -0.532399 | -0.337673 |
| O                                   | 0.170967  | 1.711588  | 0.503186              | O  | 0.071712  | -1.065864     | -1.386401 | O  | -0.210276 | 1.403663  | -1.094252 |
| H                                   | -0.477454 | 0.128041  | -1.579123             | H  | -0.595137 | -0.818735     | 1.215510  | H  | 0.477438  | 0.627267  | 1.371210  |
| C                                   | -0.014856 | -1.727420 | -2.076160             | C  | 0.045443  | 0.345923      | 2.677042  | C  | -0.046870 | -0.883430 | 2.531093  |
| C                                   | -0.896353 | -1.155670 | 2.721457              | C  | -0.354413 | 2.685784      | -1.620862 | C  | 0.598185  | -2.206447 | -2.115089 |
| H                                   | -1.446272 | -0.995446 | 0.834149              | H  | -1.132564 | 1.598933      | -0.170507 | H  | 1.268034  | -1.311679 | -0.486149 |
| C                                   | 0.850540  | 2.945125  | 0.365222              | C  | 0.565496  | -2.262367     | -1.959365 | C  | -0.822873 | 2.652311  | -1.355778 |
| H                                   | -0.641082 | 1.704954  | -0.050540             | H  | -0.790428 | -1.229418     | -0.945160 | H  | 0.627535  | 1.532559  | -0.596801 |
| C                                   | 3.483118  | -0.504689 | -0.486828             | C  | 3.512806  | -0.383349     | 0.738497  | C  | -3.569752 | -0.081593 | 0.728395  |
| H                                   | 3.026156  | -0.788397 | 1.415922              | H  | 3.314818  | 0.986859      | -0.673303 | H  | -3.243277 | -1.041044 | -0.969515 |
| H                                   | 0.809161  | -2.406977 | -1.869569             | H  | 0.970017  | 0.871521      | 2.905580  | H  | -0.925931 | -1.514900 | 2.640579  |
| H                                   | -0.132344 | -1.637294 | -3.156790             | H  | -0.204842 | -0.304457     | 3.515997  | H  | 0.172702  | -0.419479 | 3.493510  |
| H                                   | -0.928234 | -2.141383 | -1.648144             | H  | -0.750718 | 1.077858      | 2.538669  | H  | 0.796596  | -1.505678 | 2.230247  |
| H                                   | 0.018007  | -1.392917 | 3.262528              | H  | 0.639203  | 3.021682      | -1.912199 | H  | 0.965676  | -1.476812 | -2.839536 |
| H                                   | -1.646805 | -1.908101 | 2.966236              | H  | -0.966980 | 3.563118      | -1.410514 | H  | -0.353521 | -2.600696 | -2.467328 |
| H                                   | -1.255124 | -0.178009 | 3.048987              | H  | -0.797600 | 2.135370      | -2.452937 | H  | 1.309892  | -3.030425 | -2.052340 |
| H                                   | 1.779776  | 2.878983  | 0.926825              | H  | 1.552785  | -2.054541     | -2.365815 | H  | -1.779223 | 2.460561  | -1.837298 |
| H                                   | 0.257623  | 3.766736  | 0.769343              | H  | -0.079691 | -2.604180     | -2.769662 | H  | -0.210876 | 3.256546  | -2.026770 |
| H                                   | 1.085839  | 3.158368  | -0.679286             | H  | 0.651449  | -3.056840     | -1.215702 | H  | -0.998890 | 3.212991  | -0.435690 |
| H                                   | 2.901875  | -0.227288 | -1.360470             | H  | 2.805047  | -0.991227     | 1.293117  | H  | -2.922360 | 0.432596  | 1.431661  |
| H                                   | 3.900734  | -1.500092 | -0.636417             | H  | 4.046450  | 0.266538      | 1.431606  | H  | -4.047940 | -0.922467 | 1.230213  |
| H                                   | 4.288818  | 0.214591  | -0.341800             | H  | 4.220876  | -1.029929     | 0.220721  | H  | -4.329160 | 0.608474  | 0.361485  |
| C                                   | -2.770660 | 0.461949  | -0.723515             | C  | -2.807969 | -0.228229     | 0.275103  | C  | 2.758412  | 0.505701  | 0.394621  |
| O                                   | -2.798041 | -0.529943 | -0.007289             | O  | -2.622112 | 0.979611      | 0.234517  | O  | 2.684589  | -0.671596 | 0.052128  |
| O                                   | -1.839147 | 1.147563  | -1.188078             | O  | -2.034238 | -1.206403     | 0.288430  | O  | 1.863285  | 1.351426  | 0.611758  |
|                                     |           |           |                       | H  | -3.182430 | -3.469128     | 0.507619  | H  | 3.939704  | 0.947052  | 0.566310  |
|                                     |           |           |                       | H  | -3.443907 | -4.167538     | 0.565589  | H  | 4.907066  | 1.315037  | 0.707385  |
|                                     |           |           |                       |    |           |               |           |    |           |           |           |
| $\text{CHp1}$                       |           |           | $\text{OHTS1}$        |    |           | $\text{OHp1}$ |           |    |           |           |           |
| Li                                  | 0.770260  | 0.081035  | 0.445659              | Li | 0.675681  | 0.064201      | 0.240472  | Li | -0.590699 | -0.038970 | 0.102113  |
| O                                   | 0.557801  | -1.264607 | -0.959914             | O  | 1.077362  | -1.210529     | -1.162167 | O  | 0.351983  | -0.706387 | -1.526632 |
| O                                   | -0.570504 | -0.601051 | 1.663490              | O  | -0.355193 | -0.982020     | 1.509043  | O  | -0.577776 | -1.021027 | 1.747312  |

|    |           |           |           |    |           |           |           |    |                   |           |           |
|----|-----------|-----------|-----------|----|-----------|-----------|-----------|----|-------------------|-----------|-----------|
| O  | 2.684819  | 0.154516  | 0.763589  | O  | 2.458152  | 0.748746  | 0.664313  | O  | -0.098473         | 1.706807  | 0.756410  |
| O  | 0.019942  | 1.712260  | -0.139764 | O  | -0.472781 | 1.592257  | 0.043834  | O  | -2.219022         | -0.034780 | -0.955722 |
| H  | -0.426221 | -1.205395 | -0.992720 | H  | 0.284646  | -1.502056 | -1.683459 | H  | 1.199069          | -0.217230 | -1.599675 |
| C  | 0.918884  | -2.628542 | -0.818920 | C  | 1.852924  | -2.366552 | -0.863429 | C  | 0.640383          | -2.096358 | -1.613588 |
| C  | -1.225464 | 0.106133  | 2.703076  | C  | -0.953882 | -0.569800 | 2.727525  | H  | -0.023702         | -0.508773 | 2.378539  |
| H  | -1.226308 | -0.826502 | 0.960301  | H  | -1.054164 | -1.226563 | 0.872087  | C  | -0.527111         | -2.401181 | 2.081974  |
| C  | 0.503369  | 2.761591  | -0.949852 | C  | -0.270181 | 2.798652  | -0.670608 | H  | -1.896488         | -0.125417 | -1.857304 |
| H  | -0.938504 | 1.523813  | -0.369327 | H  | -1.421382 | 1.339243  | -0.010475 | C  | -3.590752         | 0.330734  | -0.917429 |
| C  | 3.604482  | 0.048568  | -0.322483 | C  | 3.528376  | 0.854884  | -0.274611 | H  | 0.370909          | 1.621787  | 1.622637  |
| H  | 3.141735  | 0.418931  | 1.563738  | H  | 2.683811  | 1.204945  | 1.477019  | C  | -0.777716         | 2.954416  | 0.696222  |
| H  | 1.998264  | -2.680384 | -0.689504 | H  | 2.613165  | -2.079443 | -0.140650 | C  | 2.765087          | 0.822051  | -0.108805 |
| O  | 0.647019  | -3.199089 | -1.707926 | H  | 2.338072  | -2.750858 | -1.761204 | O  | 2.344378          | -0.114704 | 0.710434  |
| H  | 0.441103  | -3.078604 | 0.052965  | H  | 1.232982  | -3.151236 | -0.429947 | O  | 2.671395          | 0.712446  | -1.308857 |
| H  | -0.484595 | 0.352548  | 3.460758  | H  | -0.157049 | -0.264524 | 3.401732  | H  | 3.200444          | 1.704916  | 0.369574  |
| H  | -1.999808 | -0.508240 | 3.164672  | H  | -1.502296 | -1.391412 | 3.189533  | H  | 2.265828          | 0.215519  | 1.656797  |
| H  | -1.672966 | 1.030320  | 2.333762  | H  | -1.630197 | 0.272649  | 2.574764  | H  | -0.286943         | -2.640570 | -1.447430 |
| H  | 1.550683  | 2.932270  | -0.704193 | H  | 0.792133  | 3.031010  | -0.639493 | H  | 1.366391          | -2.391590 | -0.855548 |
| H  | -0.047466 | 3.686126  | -0.767253 | H  | -0.821779 | 3.621706  | -0.214307 | H  | 1.025402          | -2.353328 | -2.600893 |
| H  | 0.429871  | 2.515842  | -2.011710 | H  | -0.577309 | 2.700234  | -1.712934 | H  | -3.866319         | 0.416915  | 0.129400  |
| H  | 3.025145  | -0.253629 | -1.189595 | H  | 3.199767  | 0.347374  | -1.175941 | H  | -4.214465         | -0.431774 | -1.384384 |
| H  | 4.364581  | -0.705136 | -0.117499 | H  | 4.428812  | 0.371483  | 0.104023  | H  | -3.760263         | 1.289726  | -1.408100 |
| H  | 4.082609  | 1.006460  | -0.526894 | H  | 3.742750  | 1.897945  | -0.507367 | H  | -1.142999         | -2.934785 | 1.362573  |
| C  | -2.750539 | -0.052710 | -0.883506 | C  | -2.883440 | -0.311216 | -1.005394 | H  | -0.925219         | -2.572965 | 3.081967  |
| O  | -2.066716 | -1.053407 | -0.518257 | O  | -2.055872 | -1.242380 | -0.634053 | H  | 0.493600          | -2.782610 | 2.032613  |
| O  | -2.426763 | 1.139744  | -0.793071 | O  | -2.992683 | 0.763388  | -0.437972 | H  | -1.274944         | 3.009217  | -0.268550 |
| H  | -3.738066 | -0.276346 | -1.321498 | H  | -3.470100 | -0.539136 | -1.902099 | H  | -0.075157         | 3.783683  | 0.778604  |
| H  | -3.350877 | -3.085972 | -0.973533 | H  | -1.623562 | -1.865477 | -1.507576 | H  | -1.522284         | 3.037384  | 1.489048  |
|    | eTS2      |           |           |    | rFA       |           |           |    | H <sub>2</sub> r2 |           |           |
| Li | -0.895760 | 0.098551  | -0.278038 | Li | 0.807766  | 0.261950  | -0.276627 | Li | -0.860019         | 0.317933  | 0.279430  |
| O  | 0.288248  | -0.537125 | -1.656053 | O  | 0.428031  | -0.674125 | 1.387742  | O  | -0.679731         | -0.822476 | -1.287412 |
| O  | -0.567749 | 1.988921  | -0.361584 | O  | -0.198393 | 1.885522  | -0.104599 | O  | 0.190183          | 1.857152  | -0.172368 |
| O  | -2.725355 | -0.484565 | -0.563543 | O  | 2.747269  | 0.257533  | -0.408626 | O  | -2.774724         | 0.420726  | 0.591034  |
| O  | -0.396534 | -0.597144 | 1.440275  | O  | -0.147358 | -0.678647 | -1.646712 | O  | 0.194997          | -0.511167 | 1.647319  |
| H  | 0.978826  | 0.153161  | -1.731443 | H  | -0.496405 | -0.988027 | 1.259557  | H  | 0.238816          | -1.166925 | -1.208026 |
| C  | 0.884455  | -1.822428 | -1.821885 | C  | 0.490083  | 0.053959  | 2.604644  | C  | -0.831854         | -0.240424 | -2.573322 |
| C  | -1.309839 | 3.141497  | -0.736781 | C  | -0.216926 | 3.152106  | -0.724009 | C  | 0.311537          | 3.182607  | 0.295008  |
| H  | 0.379750  | 2.106495  | -0.608443 | H  | -1.091940 | 1.431156  | -0.211234 | H  | 1.072799          | 1.379535  | -0.095787 |
| C  | -0.744460 | 0.032488  | 2.661093  | C  | -0.198110 | -2.036530 | -2.027899 | C  | 0.229360          | -1.815720 | 2.185726  |
| H  | 0.587498  | -0.674308 | 1.386015  | H  | -1.052565 | -0.371420 | -1.345132 | H  | 1.078029          | -0.286416 | 1.233107  |
| C  | -3.279524 | -1.637585 | 0.070185  | C  | 3.535074  | -0.780997 | 0.172055  | C  | -3.653243         | -0.640296 | 0.217957  |
| H  | -3.157567 | -0.329930 | -1.406028 | H  | 3.242094  | 0.704926  | -1.097335 | H  | -3.186257         | 0.974130  | 1.257216  |
| H  | 0.099824  | -2.561633 | -1.680103 | H  | 1.509061  | 0.416086  | 2.726929  | H  | -1.839791         | 0.164247  | -2.640601 |
| H  | 1.668981  | -1.984958 | -1.084501 | H  | 0.244518  | -0.584051 | 3.455450  | H  | -0.705119         | -0.987635 | -3.358623 |
| H  | 1.291606  | -1.930867 | -2.827017 | H  | -0.183193 | 0.911383  | 2.585590  | H  | -0.120609         | 0.571910  | -2.724708 |
| H  | -2.344810 | 2.970039  | -0.452372 | H  | 0.771568  | 3.599154  | -0.625967 | H  | -0.661498         | 3.665809  | 0.217550  |
| H  | -1.256751 | 3.313095  | -1.812722 | H  | -0.940754 | 3.814544  | -0.245028 | H  | 1.023798          | 3.748951  | -0.308018 |
| H  | -0.942997 | 4.026490  | -0.216460 | H  | -0.463121 | 3.078363  | -1.786172 | H  | 0.635903          | 3.214614  | 1.337972  |
| H  | -1.830512 | 0.068388  | 2.726607  | H  | 0.817943  | -2.378772 | -2.219383 | H  | -0.776106         | -2.080479 | 2.509487  |
| H  | -0.362437 | 1.054029  | 2.705872  | H  | -0.781729 | -2.167086 | -2.941770 | H  | 0.893301          | -1.866472 | 3.051184  |
| H  | -0.363061 | -0.530753 | 3.513697  | H  | -0.634814 | -2.655740 | -1.241152 | H  | 0.562986          | -2.544439 | 1.443808  |
| H  | -2.660762 | -1.840891 | 0.938412  | H  | 2.896501  | -1.285889 | 0.890185  | H  | -3.105706         | -1.259306 | -0.485823 |
| H  | -3.251603 | -2.501814 | -0.593215 | H  | 4.404601  | -0.369076 | 0.684308  | H  | -4.551219         | -0.250849 | -0.261603 |
| H  | -4.305438 | -1.450784 | 0.386902  | H  | 3.858906  | -1.497453 | -0.583017 | H  | -3.930660         | -1.242913 | 1.082865  |
| C  | 2.800227  | 0.256826  | 0.550060  | C  | -2.867615 | -0.207509 | 0.404156  | C  | 2.709248          | -0.397299 | -0.698248 |
| O  | 3.861866  | 0.055624  | -0.250864 | O  | -2.151873 | -1.345853 | 0.946084  | O  | 1.907511          | -1.563106 | -1.005825 |
| O  | 2.203288  | -0.700497 | 1.023429  | O  | -2.223355 | 0.388751  | -0.541861 | O  | 2.204990          | 0.327195  | 0.244960  |
| H  | 2.625673  | 1.289252  | 0.842857  | H  | -3.923185 | -0.464401 | 0.251620  | H  | 3.771070          | -0.669087 | -0.651736 |
| H  | 4.115795  | 0.902826  | -0.643261 | H  | -2.690390 | -1.731174 | 1.642534  | H  | 2.354332          | -2.056303 | -1.699191 |
|    | CHTS2     |           |           |    | CHp2      |           |           |    | OHTS2             |           |           |
| Li | 1.081078  | -0.116698 | 0.633265  | Li | -0.811592 | -0.153122 | 0.374065  | Li | -0.817460         | -0.142964 | 0.480597  |
| C  | -2.483815 | 0.513790  | -1.274101 | O  | -0.470410 | 1.459147  | -0.626869 | O  | -0.429633         | 1.375893  | -0.648447 |
| H  | -2.652068 | -0.320989 | -2.217843 | O  | 0.444898  | -0.152252 | 1.848145  | O  | 0.549716          | -0.053322 | 1.843786  |
| H  | -2.815218 | -1.066059 | -2.914377 | O  | -2.730210 | -0.169101 | 0.702974  | O  | -2.721280         | -0.048958 | 0.848923  |
| H  | -1.854359 | -0.803038 | 2.284527  | O  | -0.134100 | -1.564869 | -0.750471 | O  | -0.311461         | -1.578862 | -0.704136 |
| H  | -2.164493 | 0.885988  | 2.783057  | H  | 0.387188  | 1.100304  | -1.040916 | H  | 0.388109          | 1.013371  | -1.084637 |
| O  | 1.242728  | 1.389637  | -0.693712 | C  | -0.254639 | 2.763241  | -0.133719 | C  | -0.266956         | 2.761918  | -0.401687 |
| O  | 0.204733  | -1.525385 | -0.573209 | C  | 0.726207  | -1.330043 | 2.582540  | C  | 0.961213          | -1.117507 | 2.689274  |



**Table S6.** Cartesian Coordinates (Å) for the reactants, products, and intermediates of the  $\text{Li}(\text{NH}_3)_4 + 2 \text{C}_2\text{H}_4 \rightarrow \text{Li}(\text{NH}_3)_4 + \text{C}_5\text{H}_8\text{O}_2$  reaction pathway.

| Li(NH <sub>3</sub> ) <sub>4</sub> |           |           | CO <sub>2</sub> r |    |           | eTS       |           |    |           |           |           |
|-----------------------------------|-----------|-----------|-------------------|----|-----------|-----------|-----------|----|-----------|-----------|-----------|
| Li                                | 0.000009  | -0.000012 | -0.000099         | Li | 1.333803  | -0.001072 | -0.011985 | Li | 1.293410  | 0.027261  | -0.000221 |
| N                                 | -0.002118 | -2.055733 | 0.121696          | N  | 3.288410  | -0.001790 | -0.674313 | N  | 3.364924  | 0.057270  | 0.000105  |
| N                                 | 1.790986  | 0.638982  | -0.790750         | N  | 1.437284  | 0.005041  | 2.045205  | N  | 0.564372  | 1.955620  | -0.000046 |
| N                                 | -1.545383 | 0.617417  | -1.213109         | N  | 0.482066  | 1.749026  | -0.700506 | N  | 0.579950  | -0.990143 | -1.651582 |
| N                                 | -0.243470 | 0.799328  | 1.882126          | N  | 0.480236  | -1.753232 | -0.692624 | N  | 0.580585  | -0.990700 | 1.651083  |
| H                                 | 0.115071  | -2.493213 | -0.788954         | H  | 3.794477  | 0.814733  | -0.336390 | H  | 3.735682  | 0.535128  | -0.815264 |
| H                                 | -0.871010 | -2.415284 | 0.509192          | H  | 3.384422  | -0.003755 | -1.687587 | H  | 3.760648  | -0.877679 | -0.000233 |
| H                                 | 0.748278  | -2.405079 | 0.712681          | H  | 3.796385  | -0.815695 | -0.333014 | H  | 3.735234  | 0.534370  | 0.816127  |
| H                                 | 1.834706  | 1.651999  | -0.870016         | H  | 0.551863  | 0.006969  | 2.544983  | H  | -0.454999 | 1.930284  | 0.000547  |
| H                                 | 1.953092  | 0.265471  | -1.722743         | H  | 1.954490  | 0.821459  | 2.364792  | H  | 0.838609  | 2.497130  | -0.815237 |
| H                                 | 2.583914  | 0.355820  | -0.220235         | H  | 1.954513  | -0.808861 | 2.371057  | H  | 0.839599  | 2.497302  | 0.814699  |
| H                                 | -0.249736 | 1.816274  | 1.868390          | H  | -0.473211 | -1.960927 | -0.410612 | H  | -0.345116 | -1.335355 | 1.401755  |
| H                                 | 0.501427  | 0.520031  | 2.515792          | H  | 1.060038  | -2.514123 | -0.346333 | H  | 0.460091  | -0.408329 | 2.475111  |
| H                                 | -1.117792 | 0.507308  | 2.311889          | H  | 0.506496  | -1.809757 | -1.707407 | H  | 1.125227  | -1.798050 | 1.940656  |
| H                                 | -1.581365 | 1.629988  | -1.301480         | H  | -0.469668 | 1.962219  | -0.416791 | H  | -0.345463 | -1.335404 | -1.401911 |
| H                                 | -2.451702 | 0.322489  | -0.858137         | H  | 0.505285  | 1.799153  | -1.715720 | H  | 1.124772  | -1.797069 | -1.942017 |
| H                                 | -1.465022 | 0.244279  | -2.155821         | H  | 1.065788  | 2.509953  | -0.360850 | H  | 0.458722  | -0.407278 | -2.475156 |
|                                   |           |           |                   | C  | -2.796321 | 0.000405  | 0.011418  | C  | -2.596192 | -0.028498 | 0.000152  |
|                                   |           |           |                   | O  | -2.791412 | -1.156081 | 0.010163  | O  | -2.564809 | 1.141235  | 0.000533  |
|                                   |           |           |                   | O  | -2.792379 | 1.156845  | 0.009460  | O  | -2.293302 | -1.162507 | -0.000065 |
| CO <sub>2</sub> p                 |           |           | EtR               |    |           | EtTS1     |           |    |           |           |           |
| Li                                | 1.240280  | 0.024100  | -0.012381         | Li | -1.638042 | -0.632565 | 0.030622  | Li | -1.801591 | -0.225350 | 0.011996  |
| N                                 | 3.327989  | -0.051503 | 0.129458          | N  | -2.920585 | -2.279927 | -0.124769 | N  | -3.792823 | -0.878073 | -0.019223 |
| N                                 | 0.524386  | 1.895792  | -0.446936         | N  | -2.586895 | 1.185970  | -0.215503 | N  | -0.898483 | -0.576187 | 1.837109  |
| N                                 | 0.482236  | -1.267950 | -1.436119         | N  | -0.637620 | -0.554322 | 1.819304  | N  | -0.662830 | -1.146725 | -1.455483 |
| N                                 | 0.296483  | -0.532660 | 1.737640          | N  | -0.162584 | -0.645692 | -1.408071 | N  | -1.637400 | 1.807039  | -0.323592 |
| H                                 | 3.774493  | 0.282797  | -0.715506         | H  | -3.570804 | -2.341792 | 0.648780  | H  | -4.352439 | -0.377374 | 0.660003  |
| H                                 | 3.662654  | -0.992932 | 0.293162          | H  | -2.386441 | -3.140056 | -0.138043 | H  | -3.872180 | -1.864456 | 0.195054  |
| H                                 | 3.663174  | 0.522382  | 0.893309          | H  | -3.468376 | -2.254966 | -0.975876 | H  | -4.221946 | -0.732610 | -0.924687 |
| H                                 | -0.478068 | 1.688418  | -0.308671         | H  | -1.734267 | 1.718304  | -0.434434 | H  | -0.120602 | 0.086327  | 1.737097  |
| H                                 | 0.621815  | 2.252097  | -1.389903         | H  | -3.000133 | 1.612285  | 0.604702  | H  | -0.482783 | -1.489313 | 1.974460  |
| H                                 | 0.749636  | 2.665629  | 0.171388          | H  | -3.234436 | 1.341745  | -0.978072 | H  | -1.377735 | -0.344351 | 2.698123  |
| H                                 | 0.042075  | 0.242095  | 2.338621          | H  | 0.004700  | 0.366531  | -1.394725 | H  | -1.482191 | 2.313540  | 0.540540  |
| H                                 | 0.606590  | -1.282158 | 2.343150          | H  | -0.313880 | -0.913029 | -2.372431 | H  | -2.265566 | 2.364580  | -0.888319 |
| H                                 | -0.575619 | -0.841504 | 1.288861          | H  | 0.705911  | -1.079707 | -1.114690 | H  | -0.721177 | 1.799087  | -0.786273 |
| H                                 | -0.468493 | -1.307819 | -1.044210         | H  | 0.004511  | 0.220974  | 1.592941  | H  | 0.036190  | -0.408929 | -1.583098 |
| H                                 | 0.810002  | -2.223023 | -1.510355         | H  | -0.056731 | -1.347401 | 2.063156  | H  | -1.044523 | -1.363195 | -2.367560 |
| H                                 | 0.396902  | -0.918855 | -2.382807         | H  | -1.130655 | -0.290961 | 2.663672  | H  | -0.145201 | -1.963581 | -1.153373 |
| C                                 | -2.577155 | -0.045518 | -0.027190         | C  | 0.852022  | 2.309212  | 0.040903  | C  | 1.531376  | 1.035946  | -0.039399 |
| O                                 | -2.184932 | 1.116914  | -0.004583         | O  | 0.024932  | 2.252176  | -0.878218 | O  | 1.138164  | 1.337458  | 1.080161  |
| O                                 | -2.000159 | -1.140923 | 0.046451          | O  | 1.111516  | 1.570103  | 0.988942  | O  | 1.089348  | 1.183781  | -1.179679 |
|                                   |           |           |                   | C  | 3.126610  | -1.134872 | 0.500765  | C  | 2.694606  | -1.755938 | 0.040136  |
|                                   |           |           |                   | C  | 3.500527  | -1.412038 | -0.736156 | C  | 3.195828  | -0.496963 | 0.036231  |
|                                   |           |           |                   | H  | 3.251686  | -1.861203 | 1.294529  | H  | 2.508717  | -2.291896 | -0.881102 |
|                                   |           |           |                   | H  | 2.693693  | -0.177819 | 0.766010  | H  | 2.426999  | -2.254557 | 0.962272  |
|                                   |           |           |                   | H  | 3.939947  | -2.364769 | -1.002016 | H  | 3.592190  | -0.072642 | -0.874827 |
|                                   |           |           |                   | H  | 3.396654  | -0.684687 | -1.530962 | H  | 3.516822  | -0.035129 | 0.958367  |
| EtP                               |           |           | EtR2              |    |           | EtTS2     |           |    |           |           |           |
| Li                                | -2.171253 | 0.080239  | 0.000428          | Li | -1.967389 | -1.197103 | -0.016114 | Li | -2.903530 | -0.361981 | -0.009267 |
| N                                 | -4.265261 | 0.116375  | 0.004357          | N  | -4.025130 | -1.570497 | 0.062584  | N  | -4.891729 | -1.003242 | 0.133044  |
| N                                 | -1.363665 | -0.911543 | -1.615275         | N  | -1.165807 | -0.599871 | 1.785709  | N  | -1.862250 | -0.514910 | 1.761880  |
| N                                 | -1.315108 | 1.935959  | -0.011477         | N  | -0.824350 | -2.792369 | -0.590654 | N  | -1.791517 | -1.403919 | -1.372127 |
| N                                 | -1.358096 | -0.893828 | 1.623935          | N  | -1.473828 | 0.348664  | -1.282396 | N  | -2.701222 | 1.626023  | -0.515082 |
| H                                 | -4.627122 | 0.593708  | -0.811772         | H  | -4.279075 | -2.140901 | 0.859411  | H  | -5.350920 | -1.005971 | -0.769190 |
| H                                 | -4.623557 | 0.598531  | 0.819225          | H  | -4.354331 | -2.047646 | -0.767339 | H  | -5.436908 | -0.410199 | 0.746204  |
| H                                 | -4.660509 | -0.815598 | 0.007984          | H  | -4.541925 | -0.702974 | 0.135732  | H  | -4.944731 | -1.945010 | 0.500803  |
| H                                 | -0.458303 | -1.074677 | -1.144902         | H  | -0.353157 | -0.138371 | 1.349370  | H  | -1.151523 | 0.177601  | 1.478083  |
| H                                 | -1.173125 | -0.352415 | -2.437499         | H  | -0.800054 | -1.334825 | 2.378234  | H  | -1.374100 | -1.388721 | 1.914579  |
| H                                 | -1.695422 | -1.808672 | -1.946106         | H  | -1.605260 | 0.076971  | 2.396406  | H  | -2.224538 | -0.223958 | 2.660954  |
| H                                 | -0.454727 | -1.062974 | 1.151914          | H  | -0.535063 | 0.472838  | -0.875104 | H  | -1.733139 | 1.688678  | -0.160908 |
| H                                 | -1.689033 | -1.786759 | 1.966715          | H  | -1.928477 | 1.251610  | -1.219456 | H  | -3.230818 | 2.362719  | -0.066377 |
| H                                 | -1.163767 | -0.325096 | 2.438657          | H  | -1.355737 | 0.147506  | -2.267256 | H  | -2.674237 | 1.850346  | -1.501870 |
| H                                 | -0.328765 | 1.613606  | -0.009437         | H  | 0.097331  | -2.343273 | -0.439791 | H  | -0.883082 | -0.944931 | -1.173445 |

|    |                               |           |           |    |           |           |           |    |           |           |           |
|----|-------------------------------|-----------|-----------|----|-----------|-----------|-----------|----|-----------|-----------|-----------|
| H  | -1.428362                     | 2.539224  | 0.793902  | H  | -0.850510 | -3.094064 | -1.556868 | H  | -1.975614 | -1.276971 | -2.359762 |
| H  | -1.428672                     | 2.528194  | -0.824961 | H  | -0.834715 | -3.636199 | -0.031031 | H  | -1.652080 | -2.397895 | -1.237524 |
| C  | 1.718716                      | -0.219649 | -0.001699 | C  | 1.848130  | -0.265387 | 0.055745  | C  | 0.801995  | 0.900096  | -0.033628 |
| O  | 0.971566                      | -1.239312 | 0.001868  | O  | 0.955290  | 0.611624  | 0.244046  | O  | -0.096380 | 1.462270  | 0.652371  |
| O  | 1.329990                      | 0.963756  | -0.004745 | O  | 1.638745  | -1.477316 | -0.134364 | O  | 0.643645  | -0.110973 | -0.747299 |
| C  | 3.220468                      | -0.508033 | -0.003686 | C  | 3.288154  | 0.247432  | 0.077177  | C  | 2.185662  | 1.548830  | 0.030924  |
| C  | 4.104826                      | 0.674794  | 0.006990  | C  | 4.336404  | -0.766737 | -0.155546 | C  | 3.284041  | 0.817957  | -0.653858 |
| H  | 3.415619                      | -1.166427 | 0.850763  | H  | 3.344546  | 1.061407  | -0.654883 | H  | 2.063400  | 2.551900  | -0.398104 |
| H  | 3.414492                      | -1.149121 | -0.871923 | H  | 3.425729  | 0.755566  | 1.039187  | H  | 2.413648  | 1.732211  | 1.083106  |
| H  | 5.178654                      | 0.557734  | 0.014987  | H  | 5.379127  | -0.485176 | -0.168680 | H  | 4.281037  | 1.231882  | -0.587709 |
| H  | 3.674771                      | 1.663053  | 0.003780  | H  | 4.058705  | -1.796830 | -0.308287 | H  | 3.043081  | 0.310233  | -1.575396 |
|    |                               |           |           | C  | -1.089806 | 4.144477  | -0.573748 | C  | 4.673141  | -1.755673 | 0.156032  |
|    |                               |           |           | C  | -0.677621 | 3.537582  | 0.525297  | C  | 3.610934  | -1.041743 | 0.587885  |
|    |                               |           |           | H  | 0.035755  | 2.722216  | 0.499110  | H  | 4.577535  | -2.482071 | -0.639247 |
|    |                               |           |           | H  | -1.042253 | 3.846560  | 1.497315  | H  | 5.669123  | -1.579370 | 0.538629  |
|    |                               |           |           | H  | -0.720522 | 3.854196  | -1.549038 | H  | 2.605961  | -1.305679 | 0.292604  |
|    |                               |           |           | H  | -1.797976 | 4.962542  | -0.546401 | H  | 3.702758  | -0.413690 | 1.463661  |
|    | EtP2                          |           |           |    | LacTS     |           |           |    | LacP      |           |           |
| Li | -3.163881                     | 0.208112  | -0.007366 | Li | -2.657598 | -0.095727 | -0.043276 | Li | -2.825837 | 0.076224  | 0.051415  |
| N  | -5.246535                     | 0.433582  | -0.003845 | N  | -4.713938 | -0.513885 | -0.025112 | N  | -4.723039 | 0.728549  | 0.494104  |
| N  | -2.451652                     | -0.871644 | -1.611114 | N  | -2.262984 | 1.906688  | -0.306046 | N  | -2.461179 | -1.163299 | -1.556825 |
| N  | -2.138771                     | 1.975102  | -0.034236 | N  | -1.729663 | -0.579156 | 1.724481  | N  | -1.672495 | 1.760134  | -0.248652 |
| N  | -2.443690                     | -0.820044 | 1.626475  | N  | -1.628198 | -1.138971 | -1.488639 | N  | -2.032210 | -0.902752 | 1.686262  |
| H  | -5.562401                     | 0.969068  | -0.802794 | H  | -5.176296 | 0.121991  | 0.612699  | H  | -5.144216 | 1.311477  | -0.224621 |
| H  | -5.562907                     | 0.917026  | 0.827445  | H  | -4.907470 | -1.454523 | 0.294829  | H  | -4.609430 | 1.322137  | 1.314282  |
| H  | -5.722704                     | -0.459305 | -0.032466 | H  | -5.153161 | -0.404211 | -0.930439 | H  | -5.408667 | 0.020330  | 0.741596  |
| H  | -1.563678                     | -1.109188 | -1.138762 | H  | -1.286974 | 1.787472  | 0.026985  | H  | -1.472005 | -1.361865 | -1.422194 |
| H  | -2.213728                     | -0.342876 | -2.441010 | H  | -2.688975 | 2.624017  | 0.267051  | H  | -2.569917 | -0.728997 | -2.465405 |
| H  | -2.863141                     | -1.739781 | -1.929513 | H  | -2.216691 | 2.280386  | -1.245587 | H  | -2.952471 | -2.048414 | -1.587263 |
| H  | -1.560725                     | -1.076630 | 1.154698  | H  | -0.657623 | -0.960012 | -1.190454 | H  | -1.179788 | -1.378989 | 1.404124  |
| H  | -2.854187                     | -1.674524 | 1.980954  | H  | -1.702405 | -0.803013 | -2.441214 | H  | -2.621083 | -1.583044 | 2.156540  |
| H  | -2.195468                     | -0.261320 | 2.433436  | H  | -1.741739 | -2.144385 | -1.532260 | H  | -1.774752 | -0.210614 | 2.386101  |
| H  | -1.186215                     | 1.562713  | -0.014943 | H  | -0.896150 | -0.019421 | 1.454953  | H  | -0.736118 | 1.533339  | -0.573741 |
| H  | -2.204992                     | 2.597986  | 0.761410  | H  | -1.419752 | -1.533112 | 1.860504  | H  | -1.568321 | 2.245309  | 0.641277  |
| H  | -2.187305                     | 2.563607  | -0.856865 | H  | -2.037945 | -0.244454 | 2.628593  | H  | -2.060249 | 2.440178  | -0.897735 |
| C  | 0.684021                      | -0.449035 | 0.014379  | C  | 1.099190  | 0.726684  | -0.145630 | C  | 1.403775  | -0.835707 | -0.398226 |
| O  | -0.157095                     | -1.393259 | 0.009035  | O  | 1.056820  | -0.507752 | -0.623311 | O  | 0.423758  | -1.533530 | -0.450218 |
| O  | 0.404987                      | 0.766947  | 0.020757  | O  | 0.229210  | 1.150072  | 0.700284  | O  | 1.379962  | 0.377306  | -0.968259 |
| C  | 2.151127                      | -0.865237 | 0.018001  | C  | 2.462616  | 1.384336  | -0.206784 | C  | 2.694120  | -1.215401 | 0.268872  |
| C  | 3.152718                      | 0.273267  | -0.024064 | C  | 3.555340  | 0.336745  | -0.403815 | C  | 3.229087  | -0.103231 | 1.182053  |
| H  | 2.303159                      | -1.482261 | 0.907042  | H  | 2.504792  | 2.147759  | -0.988764 | H  | 2.533868  | -2.145958 | 0.804135  |
| H  | 2.293721                      | -1.541778 | -0.827610 | H  | 2.615320  | 1.908035  | 0.741049  | H  | 3.412866  | -1.418930 | -0.528353 |
| C  | 4.598009                      | -0.210810 | -0.001100 | H  | 4.535281  | 0.780842  | -0.224232 | H  | 4.280738  | -0.295725 | 1.384156  |
| H  | 2.976746                      | 0.941499  | 0.819873  | H  | 3.550015  | -0.023545 | -1.433777 | H  | 2.714464  | -0.152588 | 2.139912  |
| H  | 2.981748                      | 0.875519  | -0.916955 | C  | 2.115121  | -1.643456 | 0.178057  | C  | 2.572156  | 1.182350  | -0.878254 |
| H  | 4.749722                      | -0.836803 | 0.891276  | C  | 3.341558  | -0.849061 | 0.544360  | C  | 3.030219  | 1.288562  | 0.559208  |
| C  | 5.598638                      | 0.882059  | -0.018265 | H  | 1.538234  | -2.040529 | 1.004681  | H  | 3.336182  | 0.746554  | -1.523608 |
| H  | 4.776985                      | -0.889375 | -0.842999 | H  | 2.254499  | -2.364783 | -0.617999 | H  | 2.289442  | 2.147187  | -1.288786 |
| H  | 5.317920                      | 1.892932  | 0.240527  | H  | 3.250524  | -0.467150 | 1.563635  | H  | 3.947356  | 1.875601  | 0.593004  |
| H  | 6.643418                      | 0.679216  | -0.203646 | H  | 4.221599  | -1.496961 | 0.533873  | H  | 2.276164  | 1.846259  | 1.114015  |
|    | C <sub>2</sub> H <sub>4</sub> |           |           |    | δ-lactone |           |           |    |           |           |           |
| C  | -0.000000                     | -0.000000 | 0.659538  | C  | -1.719179 | -0.061151 | 0.324971  |    |           |           |           |
| C  | 0.000000                      | -0.000000 | -0.659538 | C  | -0.960800 | -1.266976 | -0.174499 |    |           |           |           |
| H  | 0.000000                      | 0.920763  | 1.227183  | C  | -1.117156 | 1.190316  | -0.287626 |    |           |           |           |
| H  | -0.000000                     | -0.920763 | 1.227183  | H  | -1.663922 | -0.012132 | 1.414570  |    |           |           |           |
| H  | 0.000000                      | 0.920763  | -1.227183 | H  | -2.769711 | -0.175425 | 0.057485  |    |           |           |           |
| H  | -0.000000                     | -0.920763 | -1.227183 | C  | 0.349863  | 1.276046  | 0.106030  |    |           |           |           |
|    |                               |           |           | H  | -1.643945 | 2.086779  | 0.036164  |    |           |           |           |
|    |                               |           |           | H  | -1.212701 | 1.143328  | -1.374682 |    |           |           |           |
|    |                               |           |           | H  | 0.436216  | 1.582227  | 1.151411  |    |           |           |           |
|    |                               |           |           | H  | 0.899447  | 2.014301  | -0.472297 |    |           |           |           |
|    |                               |           |           | C  | 1.129571  | -0.017063 | 0.013435  |    |           |           |           |
|    |                               |           |           | O  | 0.455987  | -1.183926 | 0.035733  |    |           |           |           |
|    |                               |           |           | O  | 2.325566  | -0.039155 | -0.009721 |    |           |           |           |
|    |                               |           |           | H  | -1.125559 | -1.402069 | -1.245790 |    |           |           |           |
|    |                               |           |           | H  | -1.266043 | -2.179396 | 0.331168  |    |           |           |           |

**Table S7.** Cartesian Coordinates (Å) for the reactants, products, and intermediates of the  $\text{Li}(\text{NH}_2\text{CH}_3)_4 + 2 \text{C}_2\text{H}_4 \rightarrow \text{Li}(\text{NH}_2\text{CH}_3)_4 + \text{C}_5\text{H}_8\text{O}_2$  reaction pathway.

| $\text{Li}(\text{NH}_2\text{CH}_3)_4$ |           |           |           | $\text{CO}_2\text{r}$ |           |           | eTS       |    |           |           |           |
|---------------------------------------|-----------|-----------|-----------|-----------------------|-----------|-----------|-----------|----|-----------|-----------|-----------|
| Li                                    | 0.000082  | -0.268028 | 0.000075  | Li                    | 0.973686  | 0.322844  | -0.144200 | Li | -0.864777 | 0.029861  | -0.317926 |
| N                                     | 0.473285  | 0.826367  | -1.696485 | N                     | 3.041809  | 0.168478  | -0.300889 | N  | -2.870011 | -0.361435 | -0.734746 |
| N                                     | -1.534619 | -1.571332 | -0.470398 | N                     | 0.483721  | 2.275193  | -0.612299 | N  | 0.302801  | -0.935460 | -1.726170 |
| N                                     | 1.534997  | -1.571240 | 0.470062  | N                     | 0.079025  | -0.769937 | -1.654755 | N  | -0.441325 | 2.024854  | -0.636887 |
| N                                     | -0.473227 | 0.826124  | 1.696735  | N                     | 0.150713  | -0.204753 | 1.684549  | N  | -0.296077 | -0.520777 | 1.596329  |
| H                                     | 0.870764  | 0.096000  | -2.281813 | H                     | 3.175022  | 0.554453  | -1.232176 | H  | -2.999557 | 0.128792  | -1.613619 |
| C                                     | 1.399822  | 1.961430  | -1.613232 | C                     | 3.698218  | -1.140592 | -0.206574 | C  | -3.880216 | 0.071031  | 0.236786  |
| H                                     | -0.380889 | 1.109458  | -2.164231 | H                     | 3.484952  | 0.825363  | 0.331726  | H  | -2.987621 | -1.345081 | -0.947374 |
| H                                     | -1.570252 | -2.216047 | 0.318669  | H                     | -0.534400 | 2.276009  | -0.683623 | H  | 1.166730  | -0.392928 | -1.678725 |
| H                                     | -1.163893 | -2.128468 | -1.240050 | H                     | 0.801598  | 2.398181  | -1.573344 | H  | -0.070049 | -0.736981 | -2.650672 |
| C                                     | -2.897571 | -1.130976 | -0.799337 | C                     | 0.913869  | 3.427587  | 0.192608  | C  | 0.624570  | -2.364552 | -1.619096 |
| H                                     | -0.869989 | 0.095624  | 2.282375  | H                     | 0.174980  | 0.604235  | 2.294599  | H  | 0.713167  | -0.491648 | 1.487282  |
| C                                     | -1.400586 | 1.960522  | 1.613526  | C                     | 0.644198  | -1.386807 | 2.398674  | C  | -0.704193 | -1.822000 | -1.534398 |
| H                                     | 0.380919  | 1.109936  | 2.164089  | H                     | -0.825264 | -0.331033 | 1.436746  | H  | -0.520906 | 0.212683  | 2.257897  |
| H                                     | 1.164457  | -2.128868 | 1.239442  | H                     | -0.823572 | -0.310454 | -1.775108 | H  | 0.575898  | 2.040711  | -0.526198 |
| C                                     | 2.897844  | -1.130677 | 0.799162  | C                     | -0.122598 | -2.221481 | -1.557709 | C  | -1.031474 | 3.119202  | 0.145915  |
| H                                     | 1.570768  | -2.215538 | -0.319346 | H                     | 0.590243  | -0.548887 | -2.507080 | H  | -0.582405 | 2.204813  | -1.629099 |
| H                                     | 3.316193  | -0.583836 | -0.043693 | H                     | 0.837572  | -2.717392 | -1.427273 | H  | -2.109336 | 3.138806  | -0.004551 |
| H                                     | 3.572144  | -1.955380 | 1.038050  | H                     | -0.611642 | -2.650362 | -2.434475 | H  | -0.632215 | 4.100844  | -0.116054 |
| H                                     | 2.867840  | -0.457957 | 1.654559  | H                     | -0.737069 | -2.441830 | -0.687306 | H  | -0.843458 | 2.951338  | 1.204936  |
| H                                     | -2.321342 | 1.638645  | 1.131797  | H                     | 1.680247  | -1.228429 | 2.691919  | H  | -0.439292 | -2.604339 | 1.426316  |
| H                                     | -0.961957 | 2.743510  | 0.998181  | H                     | 0.616111  | -2.247990 | 1.734138  | H  | -1.785151 | -1.844308 | 2.262351  |
| H                                     | -1.654855 | 2.389291  | 2.584846  | H                     | 0.068972  | -1.628822 | 3.294633  | H  | -0.242242 | -2.062996 | 3.093932  |
| H                                     | 2.320650  | 1.640307  | -1.131135 | H                     | 3.243677  | -1.820988 | -0.923606 | H  | -3.749318 | 1.130969  | 0.443353  |
| H                                     | 0.960449  | 2.744255  | -0.998209 | H                     | 3.543983  | -1.554168 | 0.787922  | H  | -3.736313 | -0.467094 | 1.171432  |
| H                                     | 1.654108  | 2.390156  | -2.584567 | H                     | 4.771580  | -1.106968 | -0.402958 | H  | -4.907461 | -0.089066 | -0.096501 |
| H                                     | -2.867710 | -0.457764 | -1.654352 | H                     | 2.001054  | 3.456114  | 0.238753  | H  | -0.291727 | -2.952538 | -1.641495 |
| H                                     | -3.316131 | -0.584732 | 0.043800  | H                     | 0.537648  | 3.323476  | 1.208783  | H  | 1.123592  | -2.547954 | -0.670291 |
| H                                     | -3.571618 | -1.955737 | -1.038734 | H                     | 0.564294  | 4.383285  | -0.202861 | H  | 1.278961  | -2.720866 | -2.416951 |
|                                       |           |           |           | C                     | -3.747846 | -0.107119 | 0.058848  | C  | 3.441710  | 0.346637  | 0.258747  |
|                                       |           |           |           | O                     | -4.671809 | 0.471276  | -0.315985 | O  | 4.323045  | 1.064883  | 0.041887  |
|                                       |           |           |           | O                     | -2.838561 | -0.710615 | 0.457468  | O  | 2.684822  | -0.476749 | 0.604065  |
| $\text{CO}_2\text{p}$                 |           |           |           | EtR                   |           |           | EtTS1     |    |           |           |           |
| Li                                    | -0.692997 | -0.038287 | -0.419278 | Li                    | -1.340662 | -0.159803 | 0.166175  | Li | -1.498377 | 0.248458  | -0.300751 |
| N                                     | -2.678725 | -0.377240 | -0.999102 | N                     | -2.906704 | -1.527459 | -0.085988 | N  | -3.532073 | -0.082829 | -0.705407 |
| N                                     | 0.635473  | -1.081770 | -1.624801 | N                     | -1.909231 | 1.784574  | -0.292146 | N  | -0.323933 | -1.086164 | -1.383257 |
| N                                     | -0.111465 | 1.946988  | -0.619810 | N                     | -0.659771 | -0.012280 | 2.121876  | N  | -0.835508 | 2.123000  | -0.905700 |
| N                                     | -0.473846 | -0.539851 | 1.562422  | N                     | 0.218685  | -0.729667 | -1.041879 | N  | -1.132493 | 0.167690  | 1.725909  |
| H                                     | -2.791027 | -0.204123 | -1.989827 | H                     | -3.747986 | -1.211343 | 0.379108  | H  | -4.062090 | 0.498290  | -0.068309 |
| C                                     | -3.636399 | 0.422413  | -0.229887 | C                     | -2.547130 | -2.873782 | 0.369287  | C  | -3.913311 | -1.489911 | -0.545264 |
| H                                     | -2.854624 | -1.364625 | -0.861785 | H                     | -3.116081 | -2.106316 | -1.076405 | H  | -3.760411 | 0.238581  | -1.637540 |
| H                                     | 1.404227  | -0.416706 | -1.490327 | H                     | -1.172952 | 2.213261  | 0.278692  | H  | 0.468229  | -0.449538 | -1.501417 |
| H                                     | 0.424298  | -1.078756 | -2.614903 | H                     | -2.790473 | 2.081436  | 0.108143  | H  | -0.658509 | -1.302896 | -2.313893 |
| C                                     | 1.093786  | -2.415869 | -1.222607 | C                     | -1.796415 | 2.290437  | -1.664017 | C  | 0.160162  | -2.311856 | -0.736683 |
| H                                     | 0.548043  | -0.429565 | 1.539090  | H                     | 0.730837  | 0.155985  | -0.949494 | H  | -0.124089 | 0.326490  | 1.607779  |
| C                                     | -0.830291 | -1.859701 | 2.083040  | C                     | -0.008089 | -1.039367 | -2.453110 | C  | -1.362515 | -1.002766 | 2.574096  |
| H                                     | -0.813576 | 0.175555  | 2.192915  | H                     | 0.835599  | -1.426072 | -0.641143 | H  | -1.484681 | 0.994584  | 2.192164  |
| H                                     | 0.878394  | 1.729746  | -0.777308 | H                     | -0.249417 | 0.918080  | 1.994776  | H  | 0.129972  | 1.822634  | -1.082094 |
| C                                     | -0.219437 | 2.831767  | 0.543658  | C                     | 0.374192  | -0.936319 | 2.595940  | C  | -0.818238 | 3.214446  | 0.072968  |
| H                                     | -0.435423 | 2.431049  | -1.447615 | H                     | -1.375127 | 0.089494  | 2.830896  | H  | -1.196849 | 2.462669  | -1.788169 |
| H                                     | -1.265684 | 2.993645  | 0.803419  | H                     | -0.029950 | -1.944735 | 2.681489  | H  | -1.833393 | 3.470263  | 0.377338  |
| H                                     | 0.249882  | 3.806408  | 0.393364  | H                     | 0.798088  | -0.655164 | 3.562522  | H  | -0.335848 | 4.121583  | -0.297767 |
| H                                     | 0.272038  | 2.359860  | 1.391902  | H                     | 1.187553  | -0.963559 | 1.874059  | H  | -0.267190 | 2.887045  | 0.951941  |
| H                                     | -0.435853 | -2.628252 | 1.421275  | H                     | -0.635322 | -0.269814 | -2.899637 | H  | -0.975042 | -1.891011 | 2.079475  |
| H                                     | -1.914338 | -1.974288 | 2.113427  | H                     | -0.531093 | -1.991225 | -2.552212 | H  | -2.430972 | -1.151097 | 2.731119  |
| H                                     | -0.442071 | -2.053890 | 3.085559  | H                     | 0.911074  | -1.099567 | -3.041146 | H  | -0.883664 | -0.931721 | 3.553322  |
| H                                     | -3.430698 | 1.478592  | -0.390268 | H                     | -2.334840 | -2.845690 | 1.435815  | H  | -3.664244 | -1.815769 | 0.462163  |
| H                                     | -3.500540 | 0.218896  | 0.830082  | H                     | -1.638257 | -3.190945 | -0.137455 | H  | -3.335564 | -2.098026 | -1.344650 |
| H                                     | -4.680282 | 0.231079  | -0.487139 | H                     | -3.321798 | -3.622480 | 0.191087  | H  | -4.974121 | -1.682403 | -0.718381 |
| H                                     | 0.267574  | -3.126416 | -1.251799 | H                     | -2.497001 | 1.772411  | -2.319104 | H  | -0.675535 | -2.971326 | -0.502693 |
| H                                     | 1.467948  | -2.362160 | -0.202968 | H                     | -0.786826 | 2.104675  | -2.023120 | H  | 0.656638  | -2.045605 | 0.193385  |
| H                                     | 1.898667  | -2.803588 | -1.850694 | H                     | -1.983452 | 3.363416  | -1.745898 | H  | 0.877116  | -2.866716 | -1.344650 |
| C                                     | 2.931765  | 0.521257  | 0.344440  | C                     | 1.405179  | 2.431081  | 0.525058  | C  | 2.196314  | 0.687483  | 0.035791  |
| O                                     | 2.607660  | 0.914906  | -0.784532 | O                     | 0.433069  | 2.570035  | 1.278058  | O  | 1.810305  | 0.904630  | -1.117179 |



|      |           |           |           |       |           |           |           |   |           |           |           |
|------|-----------|-----------|-----------|-------|-----------|-----------|-----------|---|-----------|-----------|-----------|
| H    | 1.872939  | -0.914498 | -2.676275 | C     | 1.276690  | -0.953169 | 2.888953  | H | 0.217767  | -1.040864 | -0.924218 |
| H    | 1.920036  | -3.045902 | -1.475848 | C     | -1.823084 | -0.620134 | -0.544003 | H | -0.875612 | -3.119906 | -0.359475 |
| H    | 0.439007  | -2.833010 | -2.416325 | O     | -1.807874 | 0.695594  | -0.388092 | H | 0.038366  | -3.280093 | -1.857099 |
| H    | 0.438491  | -2.515225 | -0.687028 | O     | -0.985107 | -1.377938 | 0.068000  | H | -1.711242 | -3.050962 | -1.905416 |
| H    | 1.603807  | 1.076417  | 2.750181  | C     | -3.151978 | -1.189676 | -0.997995 | H | -4.823239 | 0.937287  | 0.264284  |
| H    | 2.480621  | -0.393717 | 3.152564  | C     | -4.276502 | -0.185399 | -0.758383 | H | -4.474336 | -0.299120 | 1.459342  |
| H    | 0.770012  | -0.242330 | 3.564568  | H     | -3.118835 | -1.499140 | -2.046386 | H | -5.859145 | -0.492126 | 0.374389  |
| H    | 4.411396  | -2.084520 | -0.511232 | H     | -3.333609 | -2.097662 | -0.416292 | H | -0.280031 | -1.814130 | 1.733824  |
| H    | 4.109599  | -1.835580 | 1.199538  | H     | -5.244594 | -0.674380 | -0.874186 | H | -1.804690 | -1.864290 | 2.620449  |
| H    | 5.730226  | -1.563384 | 0.545510  | H     | -4.230650 | 0.614881  | -1.498731 | H | -0.399175 | -1.039262 | 3.304976  |
| H    | 2.167266  | 3.261044  | 0.910592  | C     | -2.957792 | 1.310324  | 0.777343  | H | -2.250714 | 2.889910  | 0.667652  |
| H    | 0.562524  | 2.532640  | 1.046394  | C     | -4.166989 | 0.421766  | 0.645292  | H | -3.347292 | 3.071606  | -0.697571 |
| H    | 0.814695  | 3.903490  | -0.027007 | H     | -2.444008 | 1.279801  | 1.730695  | H | -1.813619 | 3.948901  | -0.666496 |
| C    | -1.608650 | 0.684144  | -0.675310 | H     | -3.083788 | 2.319039  | 0.403077  | C | 4.343694  | -0.603669 | -0.328642 |
| O    | -0.828624 | 0.766710  | -1.664618 | H     | -4.116267 | -0.391311 | 1.372829  | C | 3.135905  | -1.302346 | 0.269845  |
| O    | -1.259802 | 0.461431  | 0.504125  | H     | -5.072415 | 0.988329  | 0.876715  | C | 4.379790  | 0.851934  | 0.117865  |
| C    | -3.089322 | 0.921511  | -0.966620 | H     | 3.308326  | -2.732126 | -1.089737 | H | 4.276737  | -0.655839 | -1.418142 |
| C    | -4.052914 | 0.456660  | 0.112238  | H     | 1.821594  | -3.669579 | -1.265823 | H | 5.252962  | -1.130940 | -0.031938 |
| H    | -3.316441 | 0.459791  | -1.928466 | H     | 2.244639  | -2.970515 | 0.291042  | C | 3.040363  | 1.523017  | -0.169319 |
| H    | -3.193851 | 1.997490  | -1.125294 | H     | 2.017429  | 3.451624  | -0.590982 | H | 5.192793  | 1.385762  | -0.377137 |
| C    | -4.137051 | -1.062467 | 0.230084  | H     | 0.871205  | 3.071369  | 0.686182  | H | 4.576809  | 0.891858  | 1.191774  |
| H    | -5.049572 | 0.852176  | -0.096144 | H     | 0.299857  | 3.798913  | -0.812377 | H | 2.918328  | 1.643967  | -1.259994 |
| H    | -3.736122 | 0.867021  | 1.071287  | H     | 4.473673  | -0.147853 | -1.559340 | H | 2.998294  | 2.520875  | 0.264186  |
| H    | -4.443668 | -1.492570 | -0.728813 | H     | 5.693658  | 0.872318  | -0.784528 | C | 1.870972  | 0.733419  | 0.356114  |
| C    | -5.043276 | -1.529807 | 1.304597  | H     | 4.225486  | 1.586873  | -1.462318 | O | 1.930130  | -0.645541 | -0.067481 |
| H    | -3.121820 | -1.440900 | 0.410553  | H     | 1.629052  | -1.898158 | 2.478129  | O | 0.683774  | 1.217784  | 0.272621  |
| H    | -5.202921 | -0.927860 | 2.188169  | H     | 0.494879  | -1.186120 | 3.616570  | H | 3.234409  | -1.339517 | 1.361566  |
| H    | -5.460366 | -2.526220 | 1.292954  | H     | 2.109294  | -0.495070 | 3.424365  | H | 3.049973  | -2.325017 | -0.099602 |
| OHTS |           |           |           | OHEtp |           |           |           |   |           |           |           |
| Li   | 1.449774  | 0.006354  | -0.385231 | Li    | 0.798381  | -0.828744 | -0.463972 |   |           |           |           |
| N    | 3.518933  | -0.036876 | -0.731080 | N     | 2.666731  | 0.002758  | -0.153241 |   |           |           |           |
| N    | 0.520310  | 1.449638  | -1.556132 | N     | 0.145437  | -0.857836 | -2.462426 |   |           |           |           |
| N    | 0.507147  | -1.773533 | -0.900733 | N     | 0.316013  | -2.690276 | 0.374418  |   |           |           |           |
| N    | 1.107234  | 0.293611  | 1.623843  | N     | 1.276145  | 2.418924  | 1.107220  |   |           |           |           |
| H    | 3.719047  | -0.151955 | -1.716450 | H     | 3.134864  | 0.209189  | -1.026400 |   |           |           |           |
| C    | 4.192749  | -1.078995 | 0.049677  | C     | 3.593205  | -0.668321 | 0.759143  |   |           |           |           |
| H    | 3.873301  | 0.876319  | -0.475481 | H     | 2.375376  | 0.900384  | 0.247994  |   |           |           |           |
| H    | -0.369468 | 0.952292  | -1.650224 | H     | -0.805647 | -1.055116 | -2.166352 |   |           |           |           |
| H    | 0.887662  | 1.559916  | -2.493079 | H     | 0.407770  | -1.562982 | -3.137790 |   |           |           |           |
| C    | 0.260136  | 2.769585  | -0.970838 | C     | 0.211215  | 0.478461  | -3.058746 |   |           |           |           |
| H    | 0.097219  | 0.374315  | 1.466273  | H     | 0.491411  | 1.781442  | 0.967944  |   |           |           |           |
| C    | 1.603438  | 1.441665  | 2.382887  | C     | 1.071193  | 3.662890  | 0.374717  |   |           |           |           |
| H    | 1.235283  | -0.551275 | 2.166326  | H     | 1.355245  | 2.599133  | 2.098569  |   |           |           |           |
| H    | -0.379071 | -1.344871 | -1.178619 | H     | -0.657202 | -2.544875 | 0.122867  |   |           |           |           |
| C    | 0.245040  | -2.746207 | 0.165448  | C     | 0.449497  | -2.703683 | 1.833523  |   |           |           |           |
| H    | 0.864940  | -2.251925 | -1.717884 | H     | 0.603096  | -3.577096 | -0.017231 |   |           |           |           |
| H    | 1.182532  | -3.142189 | 0.555875  | H     | 1.494461  | -2.844589 | 2.104519  |   |           |           |           |
| H    | -0.372705 | -3.587158 | -0.156249 | H     | -0.138130 | -3.484734 | 2.321963  |   |           |           |           |
| H    | -0.278617 | -2.245267 | 0.976505  | H     | 0.126826  | -1.739474 | 2.220287  |   |           |           |           |
| H    | 1.439246  | 2.352718  | 1.811093  | H     | 0.981675  | 3.443685  | -0.688710 |   |           |           |           |
| H    | 2.676423  | 1.346957  | 2.551816  | H     | 1.932780  | 4.318271  | 0.500358  |   |           |           |           |
| H    | 1.118212  | 1.566504  | 3.353528  | H     | 0.176471  | 4.218772  | 0.672193  |   |           |           |           |
| H    | 3.800313  | -2.052116 | -0.237761 | H     | 3.872567  | -1.643124 | 0.361261  |   |           |           |           |
| H    | 3.970277  | -0.933783 | 1.104471  | H     | 3.097310  | -0.832785 | 1.713775  |   |           |           |           |
| H    | 5.277319  | -1.093694 | -0.075832 | H     | 4.508732  | -0.102707 | 0.950895  |   |           |           |           |
| H    | 1.198380  | 3.286450  | -0.769835 | H     | 1.237880  | 0.702895  | -3.345051 |   |           |           |           |
| H    | -0.267310 | 2.634924  | -0.029582 | H     | -0.097683 | 1.206830  | -2.312189 |   |           |           |           |
| H    | -0.352384 | 3.411775  | -1.607481 | H     | -0.422235 | 0.600173  | -3.940693 |   |           |           |           |
| C    | -2.390445 | 0.118179  | -0.097485 | C     | -1.786963 | 0.078681  | 0.262476  |   |           |           |           |
| O    | -1.941878 | -0.181981 | -1.330503 | O     | -2.181955 | -1.063720 | -0.451918 |   |           |           |           |
| O    | -1.644809 | 0.386278  | 0.836347  | O     | -0.526085 | 0.241908  | 0.302647  |   |           |           |           |
| C    | -3.847765 | -0.069726 | -0.164988 | C     | -2.771318 | 0.873895  | 0.824913  |   |           |           |           |
| C    | -4.610905 | -0.549712 | 0.922413  | C     | -4.145204 | 0.694689  | 0.746993  |   |           |           |           |
| H    | -3.122878 | -0.607462 | -1.390774 | H     | -3.139800 | -1.138746 | -0.393102 |   |           |           |           |
| H    | -4.311055 | 0.677158  | -0.806178 | H     | -2.391948 | 1.718282  | 1.384831  |   |           |           |           |
| H    | -4.143699 | -1.091697 | 1.731667  | H     | -4.615953 | -0.099845 | 0.180831  |   |           |           |           |
| H    | -5.687638 | -0.477992 | 0.922841  | H     | -4.818723 | 1.373083  | 1.245397  |   |           |           |           |



**Table S8.** Harmonic vibrational frequencies ( $\text{cm}^{-1}$ ) for the reactants, products, and intermediates of the  $\text{Li}(\text{NH}_3)_4 + \text{CO}_2 + 2 \text{H}_2 \rightarrow \text{Li}(\text{NH}_3)_4 + \text{CH}_2(\text{OH})_2$  reaction pathway.

| Li(NH <sub>3</sub> ) <sub>4</sub> |        |        | CO <sub>2</sub>   |        |        | H <sub>2</sub> |        |        | Formic Acid       |        |        |
|-----------------------------------|--------|--------|-------------------|--------|--------|----------------|--------|--------|-------------------|--------|--------|
| 58.2                              | 324.3  | 1646.1 | 686.2             |        |        | 4406.9         |        |        | 527.6             |        |        |
| 64.5                              | 407.3  | 1646.1 | 686.2             |        |        |                |        |        | 670.6             |        |        |
| 64.8                              | 407.4  | 1646.1 | 1399.5            |        |        |                |        |        | 1048.8            |        |        |
| 65.0                              | 503.6  | 3407.9 | 2450.6            |        |        |                |        |        | 1128.8            |        |        |
| 74.4                              | 503.8  | 3408.0 |                   |        |        |                |        |        | 1282.7            |        |        |
| 74.5                              | 504.2  | 3408.0 |                   |        |        |                |        |        | 1424.6            |        |        |
| 76.2                              | 1147.8 | 3425.9 |                   |        |        |                |        |        | 1903.1            |        |        |
| 76.4                              | 1147.8 | 3527.4 |                   |        |        |                |        |        | 2995.4            |        |        |
| 76.5                              | 1147.8 | 3527.4 |                   |        |        |                |        |        | 3843.7            |        |        |
| 239.0                             | 1159.1 | 3527.4 |                   |        |        |                |        |        |                   |        |        |
| 315.2                             | 1638.5 | 3530.4 |                   |        |        |                |        |        |                   |        |        |
| 315.3                             | 1638.5 | 3530.4 |                   |        |        |                |        |        |                   |        |        |
| 315.6                             | 1644.3 | 3534.8 |                   |        |        |                |        |        |                   |        |        |
| 324.1                             | 1644.3 | 3534.8 |                   |        |        |                |        |        |                   |        |        |
| 324.2                             | 1644.3 | 3534.9 |                   |        |        |                |        |        |                   |        |        |
| Methyldiol                        |        |        | CO <sub>2</sub> r |        |        | eTS1           |        |        | CO <sub>2</sub> p |        |        |
| 357.4                             |        |        | 15.4              | 329.1  | 1643.2 | -796.2         | 323.4  | 1651.3 | 11.7              | 350.3  | 1665.6 |
| 373.6                             |        |        | 22.2              | 342.9  | 1647.2 | 19.7           | 329.6  | 1653.0 | 30.4              | 377.0  | 1666.0 |
| 564.8                             |        |        | 38.4              | 346.6  | 1647.6 | 39.7           | 345.8  | 1657.2 | 41.9              | 397.0  | 1691.7 |
| 1014.9                            |        |        | 51.5              | 413.6  | 1653.5 | 51.3           | 351.8  | 1658.7 | 63.4              | 423.5  | 1701.7 |
| 1062.9                            |        |        | 53.5              | 423.3  | 1655.0 | 58.8           | 383.7  | 1658.7 | 69.2              | 500.1  | 1705.1 |
| 1093.0                            |        |        | 64.5              | 499.6  | 2428.3 | 69.0           | 418.5  | 2270.2 | 107.1             | 556.7  | 1723.5 |
| 1210.9                            |        |        | 75.4              | 502.0  | 3390.9 | 82.6           | 450.5  | 3407.5 | 113.8             | 564.1  | 3212.3 |
| 1375.7                            |        |        | 79.7              | 513.1  | 3404.3 | 84.7           | 513.0  | 3413.3 | 122.9             | 575.8  | 3270.2 |
| 1393.6                            |        |        | 85.9              | 638.3  | 3421.4 | 88.8           | 526.5  | 3421.9 | 141.3             | 645.4  | 3307.1 |
| 1452.5                            |        |        | 86.0              | 641.9  | 3430.1 | 92.3           | 565.1  | 3448.1 | 184.8             | 747.5  | 3501.7 |
| 1536.4                            |        |        | 88.6              | 1153.1 | 3505.1 | 116.4          | 1142.9 | 3507.2 | 225.0             | 1130.0 | 3539.1 |
| 3057.5                            |        |        | 95.1              | 1156.2 | 3513.5 | 117.7          | 1159.3 | 3519.8 | 228.8             | 1213.2 | 3543.1 |
| 3103.2                            |        |        | 105.9             | 1161.1 | 3514.8 | 127.4          | 1168.0 | 3522.7 | 237.0             | 1233.5 | 3544.5 |
| 3846.3                            |        |        | 127.1             | 1168.5 | 3529.1 | 136.6          | 1184.0 | 3544.0 | 249.8             | 1250.9 | 3601.1 |
| 3847.2                            |        |        | 237.6             | 1389.8 | 3530.7 | 157.0          | 1217.4 | 3546.4 | 255.8             | 1346.3 | 3605.2 |
|                                   |        |        | 317.2             | 1636.4 | 3532.3 | 209.2          | 1643.3 | 3549.7 | 265.7             | 1649.3 | 3605.8 |
|                                   |        |        | 320.8             | 1636.6 | 3553.3 | 238.7          | 1645.1 | 3564.7 | 316.8             | 1653.8 | 3612.9 |
|                                   |        |        | 326.1             | 1643.1 | 3554.2 | 315.9          | 1649.4 | 3565.6 | 321.7             | 1665.4 | 3613.3 |
| H <sub>2</sub> r1                 |        |        | CHTS1             |        |        | CHp1           |        |        | OHTS1             |        |        |
| 14.8                              | 323.0  | 1665.6 | -485.1            | 352.9  | 1654.9 | 5.2            | 323.2  | 1660.9 | -1431.1           | 346.3  | 1666.3 |
| 28.8                              | 348.8  | 1665.9 | 13.5              | 375.0  | 1665.7 | 22.9           | 354.6  | 1665.3 | 24.8              | 374.4  | 1666.5 |
| 30.7                              | 376.6  | 1666.2 | 26.8              | 378.8  | 1666.0 | 44.5           | 381.1  | 1665.9 | 29.9              | 382.7  | 1669.7 |
| 32.7                              | 394.0  | 1690.9 | 44.0              | 395.9  | 1668.5 | 57.7           | 396.8  | 1672.0 | 48.5              | 406.6  | 1685.6 |
| 42.5                              | 398.6  | 1701.2 | 55.9              | 427.5  | 1695.4 | 63.3           | 430.9  | 1697.2 | 57.6              | 476.9  | 1694.8 |
| 64.9                              | 423.2  | 1704.7 | 67.9              | 507.4  | 1703.0 | 66.5           | 513.1  | 1711.9 | 69.5              | 533.4  | 1711.2 |
| 70.9                              | 423.6  | 1724.2 | 75.2              | 564.4  | 1709.5 | 108.3          | 564.8  | 1719.9 | 83.5              | 560.2  | 1739.0 |
| 108.5                             | 496.4  | 3228.0 | 109.0             | 571.4  | 1725.3 | 113.2          | 576.4  | 2922.6 | 106.3             | 565.2  | 3023.9 |
| 114.9                             | 553.2  | 3285.2 | 113.8             | 574.1  | 3192.0 | 127.6          | 579.5  | 3172.4 | 111.0             | 625.9  | 3258.5 |
| 122.9                             | 565.1  | 3322.4 | 125.7             | 655.9  | 3260.1 | 140.0          | 659.6  | 3225.2 | 117.9             | 669.7  | 3390.3 |
| 145.4                             | 575.8  | 3501.5 | 187.3             | 783.8  | 3296.6 | 155.5          | 773.3  | 3269.0 | 156.5             | 802.5  | 3404.7 |
| 178.6                             | 643.3  | 3540.0 | 204.8             | 1103.7 | 3501.8 | 195.6          | 1090.2 | 3502.2 | 181.6             | 1090.3 | 3500.3 |
| 185.0                             | 748.2  | 3543.5 | 235.3             | 1131.3 | 3539.0 | 233.3          | 1127.3 | 3539.2 | 193.7             | 1138.3 | 3535.5 |
| 221.7                             | 1132.0 | 3544.8 | 238.4             | 1210.7 | 3545.7 | 240.3          | 1213.4 | 3545.1 | 214.1             | 1198.2 | 3545.6 |
| 224.7                             | 1213.0 | 3601.6 | 250.2             | 1233.6 | 3546.8 | 247.5          | 1239.4 | 3546.1 | 227.2             | 1217.7 | 3546.1 |
| 235.3                             | 1232.0 | 3604.8 | 266.1             | 1258.0 | 3600.7 | 252.6          | 1262.2 | 3601.1 | 240.1             | 1258.8 | 3595.4 |
| 246.9                             | 1247.3 | 3605.7 | 267.9             | 1331.5 | 3607.0 | 274.3          | 1394.7 | 3607.8 | 253.6             | 1321.8 | 3599.3 |
| 250.9                             | 1345.6 | 3612.4 | 297.6             | 1385.3 | 3607.3 | 279.4          | 1408.9 | 3607.9 | 315.9             | 1411.3 | 3599.4 |
| 263.3                             | 1649.5 | 3612.8 | 318.0             | 1479.5 | 3612.9 | 296.2          | 1638.9 | 3613.9 | 321.0             | 1653.5 | 3609.9 |
| 317.7                             | 1654.2 | 4340.8 | 324.2             | 1651.6 | 3613.0 | 317.7          | 1650.2 | 3614.0 | 325.5             | 1658.0 | 3611.3 |
| OHp1                              |        |        | eTS2              |        |        | rFA            |        |        | H <sub>2</sub> r2 |        |        |
| 22.7                              | 428.0  | 1688.9 | -784.8            | 405.7  | 1687.0 | 19.2           | 410.9  | 1706.5 | 19.9              | 362.0  | 1647.7 |

|        |        |        |       |        |        |        |        |        |       |        |        |
|--------|--------|--------|-------|--------|--------|--------|--------|--------|-------|--------|--------|
| 36.1   | 456.9  | 1825.7 | 30.7  | 454.3  | 1699.6 | 42.8   | 529.1  | 1722.7 | 27.9  | 384.6  | 1662.4 |
| 37.0   | 515.7  | 3058.3 | 36.1  | 475.5  | 3112.3 | 57.5   | 541.2  | 2908.7 | 40.2  | 392.6  | 1665.0 |
| 50.4   | 540.4  | 3330.7 | 38.2  | 482.0  | 3260.6 | 62.3   | 557.3  | 3113.1 | 47.0  | 412.6  | 1666.9 |
| 64.9   | 546.7  | 3338.7 | 48.9  | 540.6  | 3379.4 | 70.2   | 570.7  | 3154.3 | 59.0  | 437.0  | 1674.4 |
| 73.5   | 567.1  | 3437.7 | 66.4  | 551.6  | 3399.0 | 92.8   | 583.6  | 3263.3 | 63.8  | 461.3  | 1705.6 |
| 78.9   | 691.4  | 3440.9 | 92.3  | 624.7  | 3442.7 | 104.3  | 654.8  | 3504.3 | 72.5  | 528.7  | 1721.5 |
| 87.3   | 1047.7 | 3457.2 | 105.3 | 647.3  | 3476.3 | 109.3  | 897.1  | 3541.3 | 95.3  | 539.5  | 2913.7 |
| 97.3   | 1143.5 | 3461.9 | 108.0 | 1003.3 | 3507.1 | 122.6  | 979.8  | 3541.9 | 105.2 | 558.1  | 3132.3 |
| 105.8  | 1153.4 | 3510.2 | 116.9 | 1135.9 | 3547.7 | 182.8  | 1106.7 | 3546.6 | 110.8 | 569.7  | 3173.1 |
| 116.2  | 1161.3 | 3538.8 | 150.4 | 1178.9 | 3551.1 | 214.2  | 1165.9 | 3607.2 | 123.5 | 583.3  | 3269.8 |
| 127.9  | 1192.7 | 3547.9 | 161.1 | 1191.9 | 3589.0 | 224.4  | 1211.1 | 3607.9 | 181.1 | 654.6  | 3504.0 |
| 144.7  | 1204.5 | 3570.6 | 181.1 | 1197.6 | 3595.3 | 229.4  | 1221.2 | 3610.8 | 208.0 | 901.5  | 3541.6 |
| 159.7  | 1261.0 | 3572.8 | 196.5 | 1238.3 | 3603.1 | 268.9  | 1254.8 | 3618.0 | 209.5 | 980.6  | 3542.1 |
| 190.9  | 1419.7 | 3583.0 | 220.3 | 1365.6 | 3606.6 | 286.3  | 1315.8 | 3619.5 | 223.2 | 1109.5 | 3546.3 |
| 235.1  | 1630.1 | 3592.5 | 231.6 | 1577.2 | 3719.3 | 296.5  | 1464.3 | 3860.1 | 230.4 | 1167.7 | 3607.3 |
| 318.1  | 1639.3 |        | 255.3 | 1628.5 |        | 299.6  | 1642.9 |        | 265.9 | 1211.1 | 3607.6 |
| 325.9  | 1645.7 |        | 320.3 | 1637.1 |        | 302.8  | 1647.0 |        | 282.9 | 1222.1 | 3610.0 |
| 337.4  | 1654.4 |        | 328.5 | 1652.1 |        | 307.8  | 1661.7 |        | 295.4 | 1254.3 | 3617.4 |
| 347.2  | 1658.1 |        | 337.6 | 1658.2 |        | 363.4  | 1664.8 |        | 301.0 | 1318.0 | 3618.8 |
| 361.5  | 1661.8 |        | 367.9 | 1660.6 |        | 385.0  | 1666.7 |        | 303.7 | 1462.5 | 3859.8 |
| 373.0  | 1663.9 |        | 377.6 | 1671.2 |        | 392.5  | 1674.7 |        | 308.2 | 1643.7 | 4300.3 |
| CHTS2  |        |        | CHp2  |        |        | OHTS2  |        |        | OHp2  |        |        |
| -432.5 | 473.9  | 1671.5 | 15.6  | 389.4  | 1654.6 | -517.4 | 377.4  | 1654.3 | 21.5  | 373.5  | 1646.1 |
| 81.1   | 478.7  | 1678.2 | 29.1  | 407.4  | 1663.8 | 19.2   | 388.1  | 1663.1 | 42.2  | 404.8  | 1647.8 |
| 91.8   | 490.0  | 1683.5 | 50.6  | 413.3  | 1665.5 | 31.1   | 412.2  | 1664.0 | 42.8  | 441.7  | 1650.9 |
| 103.5  | 508.0  | 1685.3 | 61.2  | 463.2  | 1667.4 | 52.6   | 495.6  | 1666.3 | 61.7  | 444.7  | 1653.6 |
| 115.0  | 546.7  | 1716.9 | 62.0  | 510.3  | 1695.8 | 60.6   | 522.7  | 1685.4 | 67.3  | 507.8  | 1675.2 |
| 121.1  | 584.8  | 1721.9 | 90.1  | 540.5  | 1705.4 | 69.6   | 548.4  | 1699.0 | 69.7  | 518.4  | 1679.2 |
| 148.1  | 605.0  | 1741.1 | 98.9  | 561.2  | 1717.5 | 91.7   | 560.7  | 1708.7 | 73.3  | 532.7  | 3077.1 |
| 150.3  | 642.9  | 1848.5 | 106.9 | 566.4  | 2892.9 | 99.7   | 571.5  | 2921.2 | 76.0  | 566.8  | 3129.5 |
| 161.4  | 658.3  | 2759.1 | 113.1 | 580.5  | 2917.2 | 105.8  | 578.8  | 2937.6 | 93.1  | 1007.9 | 3361.1 |
| 214.2  | 724.6  | 2857.0 | 183.8 | 656.9  | 3117.3 | 116.2  | 640.2  | 3220.1 | 99.6  | 1056.0 | 3420.7 |
| 217.0  | 809.7  | 3009.6 | 188.6 | 862.5  | 3178.5 | 153.9  | 888.7  | 3294.6 | 105.7 | 1074.0 | 3431.3 |
| 242.9  | 1122.3 | 3235.4 | 206.5 | 1108.3 | 3349.5 | 180.7  | 1106.5 | 3370.0 | 121.2 | 1148.3 | 3436.9 |
| 293.8  | 1160.7 | 3394.9 | 214.1 | 1110.1 | 3503.8 | 191.3  | 1118.5 | 3502.8 | 138.5 | 1161.4 | 3467.2 |
| 307.4  | 1225.1 | 3422.6 | 232.6 | 1152.4 | 3541.4 | 210.2  | 1151.1 | 3540.6 | 186.2 | 1166.3 | 3483.2 |
| 334.5  | 1243.4 | 3423.0 | 240.5 | 1213.9 | 3542.2 | 218.6  | 1208.7 | 3543.4 | 198.8 | 1176.9 | 3532.2 |
| 363.9  | 1304.1 | 3428.1 | 260.4 | 1230.0 | 3547.4 | 231.4  | 1221.0 | 3549.0 | 237.7 | 1198.8 | 3534.0 |
| 365.6  | 1314.9 | 3478.3 | 269.4 | 1259.7 | 3605.3 | 241.0  | 1246.4 | 3604.8 | 295.0 | 1393.1 | 3539.3 |
| 375.9  | 1318.1 | 3480.0 | 297.3 | 1266.8 | 3606.2 | 289.4  | 1271.3 | 3605.7 | 322.0 | 1397.8 | 3547.4 |
| 401.3  | 1344.0 | 3481.5 | 304.5 | 1296.8 | 3606.6 | 308.8  | 1288.1 | 3606.0 | 325.3 | 1443.4 | 3555.0 |
| 408.3  | 1405.6 | 3488.6 | 308.7 | 1438.3 | 3616.5 | 318.3  | 1443.0 | 3614.3 | 326.5 | 1526.4 | 3559.6 |
| 411.0  | 1463.2 | 3490.6 | 352.5 | 1539.7 | 3619.3 | 348.7  | 1532.9 | 3617.6 | 336.2 | 1628.4 | 3706.0 |
| 437.9  | 1659.7 | 3716.8 | 379.8 | 1646.4 | 3842.8 | 351.2  | 1646.1 | 3842.4 | 357.3 | 1631.4 | 3829.8 |

**Table S9.** Harmonic vibrational frequencies ( $\text{cm}^{-1}$ ) for the reactants, products, and intermediates of the  $\text{Li}(\text{NH}_2\text{CH}_3)_4 + \text{CO}_2 + 2 \text{H}_2 \rightarrow \text{Li}(\text{NH}_2\text{CH}_3)_4 + \text{CH}_2(\text{OH})_2$  reaction pathway.

| Li(NH <sub>2</sub> CH <sub>3</sub> ) <sub>4</sub> |        |        | CO <sub>2</sub> r |        |        | eTS1   |        |        | CO <sub>2</sub> p |        |        |
|---------------------------------------------------|--------|--------|-------------------|--------|--------|--------|--------|--------|-------------------|--------|--------|
| 31.6                                              | 993.0  | 1651.7 | 14.6              | 554.9  | 1511.7 | -382.4 | 507.8  | 1511.2 | 18.5              | 603.8  | 1513.1 |
| 32.0                                              | 997.9  | 3038.8 | 23.8              | 581.9  | 1522.2 | 19.8   | 536.7  | 1522.5 | 23.5              | 745.3  | 1523.6 |
| 33.4                                              | 1001.9 | 3039.1 | 25.6              | 958.1  | 1523.8 | 26.3   | 948.6  | 1524.9 | 41.1              | 934.7  | 1528.4 |
| 34.3                                              | 1058.2 | 3041.3 | 31.9              | 964.4  | 1526.6 | 31.6   | 971.4  | 1526.4 | 49.9              | 984.7  | 1529.5 |
| 45.3                                              | 1060.4 | 3041.9 | 33.8              | 969.3  | 1527.8 | 33.3   | 975.3  | 1528.5 | 51.8              | 987.2  | 1531.2 |
| 56.9                                              | 1062.5 | 3099.9 | 37.4              | 989.8  | 1617.5 | 39.0   | 989.2  | 1621.3 | 69.3              | 996.7  | 1663.5 |
| 65.3                                              | 1063.5 | 3100.1 | 40.4              | 993.5  | 1640.4 | 51.9   | 996.4  | 1641.2 | 77.3              | 999.1  | 1680.1 |
| 75.5                                              | 1207.5 | 3105.7 | 48.4              | 998.2  | 1650.3 | 54.0   | 997.9  | 1656.4 | 79.7              | 1045.3 | 1695.7 |
| 75.7                                              | 1207.7 | 3106.5 | 53.9              | 998.7  | 1662.7 | 55.6   | 1005.2 | 1667.7 | 86.7              | 1058.0 | 1697.5 |
| 97.1                                              | 1215.4 | 3123.7 | 65.1              | 1004.9 | 2423.6 | 59.8   | 1013.2 | 2353.3 | 101.8             | 1065.8 | 1711.6 |
| 129.2                                             | 1218.4 | 3124.1 | 68.8              | 1057.6 | 3038.1 | 65.4   | 1058.5 | 3040.4 | 103.5             | 1067.8 | 3032.8 |
| 135.0                                             | 1351.5 | 3132.5 | 73.4              | 1060.0 | 3040.5 | 70.9   | 1060.8 | 3040.8 | 110.6             | 1072.8 | 3034.6 |
| 135.1                                             | 1352.7 | 3133.0 | 82.9              | 1063.3 | 3041.2 | 81.4   | 1064.6 | 3041.2 | 133.3             | 1081.4 | 3035.9 |
| 166.0                                             | 1353.9 | 3381.4 | 97.2              | 1066.5 | 3042.5 | 95.8   | 1068.2 | 3042.5 | 138.2             | 1089.0 | 3040.1 |
| 168.7                                             | 1355.4 | 3389.4 | 111.0             | 1207.4 | 3099.1 | 98.5   | 1203.9 | 3099.8 | 140.5             | 1199.8 | 3083.7 |
| 181.6                                             | 1457.8 | 3430.2 | 114.6             | 1210.3 | 3102.5 | 125.4  | 1212.9 | 3100.3 | 155.2             | 1228.6 | 3086.5 |
| 208.4                                             | 1458.2 | 3448.2 | 133.2             | 1216.1 | 3103.4 | 130.5  | 1218.9 | 3102.0 | 164.9             | 1235.6 | 3087.7 |
| 233.6                                             | 1465.2 | 3450.8 | 147.8             | 1220.0 | 3107.0 | 137.5  | 1223.0 | 3108.1 | 170.5             | 1241.0 | 3108.5 |
| 355.5                                             | 1467.9 | 3456.6 | 160.9             | 1352.4 | 3121.8 | 146.2  | 1297.5 | 3123.1 | 177.4             | 1349.0 | 3122.3 |
| 374.7                                             | 1504.4 | 3536.2 | 179.4             | 1353.0 | 3129.9 | 166.8  | 1352.6 | 3130.1 | 197.7             | 1353.0 | 3128.0 |
| 402.5                                             | 1504.5 | 3536.4 | 187.5             | 1354.0 | 3130.9 | 173.7  | 1354.3 | 3132.9 | 215.3             | 1376.7 | 3135.7 |
| 437.4                                             | 1507.6 |        | 199.6             | 1358.7 | 3133.8 | 186.7  | 1356.4 | 3135.5 | 229.7             | 1380.9 | 3136.9 |
| 475.6                                             | 1509.4 |        | 239.9             | 1379.8 | 3375.5 | 210.5  | 1362.4 | 3337.8 | 238.0             | 1397.0 | 3284.9 |
| 491.3                                             | 1521.9 |        | 372.4             | 1457.7 | 3394.1 | 236.0  | 1458.1 | 3377.6 | 248.4             | 1467.2 | 3311.5 |
| 496.2                                             | 1522.1 |        | 392.6             | 1460.9 | 3430.2 | 366.6  | 1461.8 | 3449.6 | 374.0             | 1468.3 | 3343.4 |
| 956.9                                             | 1524.2 |        | 399.3             | 1466.0 | 3452.6 | 373.2  | 1467.4 | 3483.0 | 405.7             | 1469.0 | 3523.9 |
| 959.9                                             | 1526.5 |        | 441.0             | 1468.9 | 3460.6 | 394.7  | 1470.7 | 3488.4 | 456.8             | 1471.7 | 3551.4 |
| 964.3                                             | 1618.2 |        | 463.9             | 1504.1 | 3495.9 | 420.3  | 1504.0 | 3493.9 | 507.8             | 1508.6 | 3553.7 |
| 990.9                                             | 1638.3 |        | 497.4             | 1504.5 | 3540.4 | 442.4  | 1507.2 | 3561.1 | 521.0             | 1509.6 | 3554.7 |
| 991.2                                             | 1645.6 |        | 514.5             | 1507.8 | 3559.6 | 491.1  | 1508.5 | 3561.7 | 543.4             | 1512.0 | 3592.0 |
| H <sub>2</sub> r1                                 |        |        | CHTS1             |        |        | CHp1   |        |        | OHTS1             |        |        |
| 14.3                                              | 507.0  | 1512.0 | -505.6            | 561.0  | 3087.7 | 19.1   | 556.3  | 1512.4 | -1398.0           | 585.1  | 1511.3 |
| 23.2                                              | 519.9  | 1513.1 | 20.1              | 607.5  | 3111.1 | 22.0   | 611.7  | 1513.5 | 28.2              | 668.9  | 1513.7 |
| 24.9                                              | 543.3  | 1523.7 | 33.1              | 780.3  | 3122.0 | 37.3   | 770.3  | 1523.2 | 28.7              | 810.1  | 1523.8 |
| 28.4                                              | 602.8  | 1528.3 | 43.4              | 936.4  | 3127.7 | 42.3   | 932.5  | 1528.3 | 37.7              | 942.4  | 1528.0 |
| 42.2                                              | 746.3  | 1529.6 | 46.5              | 984.9  | 3135.8 | 46.2   | 986.0  | 1529.8 | 41.7              | 982.0  | 1530.0 |
| 49.0                                              | 936.2  | 1531.1 | 56.0              | 987.9  | 3139.9 | 49.7   | 987.4  | 1531.7 | 51.0              | 988.8  | 1531.5 |
| 53.2                                              | 984.5  | 1663.7 | 62.4              | 998.7  | 3271.9 | 53.9   | 999.1  | 1659.5 | 56.0              | 998.5  | 1663.3 |
| 69.1                                              | 987.2  | 1680.0 | 74.5              | 1001.6 | 3306.1 | 71.2   | 1000.8 | 1663.8 | 64.8              | 1002.8 | 1673.9 |
| 77.5                                              | 996.8  | 1695.7 | 81.7              | 1047.7 | 3340.2 | 83.2   | 1053.8 | 1685.4 | 70.7              | 1023.7 | 1687.3 |
| 79.7                                              | 999.1  | 1697.1 | 89.3              | 1060.6 | 3524.0 | 86.6   | 1064.6 | 1705.7 | 79.8              | 1048.2 | 1702.7 |
| 86.3                                              | 1044.5 | 1711.3 | 96.5              | 1064.2 | 3551.5 | 92.5   | 1067.0 | 1706.5 | 89.0              | 1060.8 | 1731.2 |
| 100.7                                             | 1057.4 | 3034.1 | 103.8             | 1068.9 | 3552.3 | 103.9  | 1072.3 | 2803.6 | 93.2              | 1065.4 | 3025.2 |
| 102.3                                             | 1065.4 | 3035.4 | 105.3             | 1074.0 | 3554.8 | 106.8  | 1076.9 | 3029.7 | 99.2              | 1070.4 | 3036.0 |
| 110.3                                             | 1067.4 | 3036.6 | 117.3             | 1084.0 | 3591.9 | 115.5  | 1085.3 | 3030.9 | 105.9             | 1075.9 | 3039.3 |
| 132.7                                             | 1072.5 | 3040.6 | 126.1             | 1092.9 | 1511.2 | 122.8  | 1087.1 | 3032.0 | 122.5             | 1081.7 | 3041.4 |
| 137.7                                             | 1081.1 | 3084.8 | 141.1             | 1110.1 | 1511.4 | 134.5  | 1099.8 | 3038.9 | 130.1             | 1091.3 | 3042.8 |
| 140.3                                             | 1087.9 | 3087.5 | 154.6             | 1201.3 | 1513.5 | 140.7  | 1199.2 | 3079.9 | 137.4             | 1202.6 | 3087.7 |
| 156.4                                             | 1200.3 | 3088.8 | 164.4             | 1229.6 | 1525.2 | 142.3  | 1231.6 | 3082.4 | 144.1             | 1223.8 | 3092.7 |
| 164.2                                             | 1228.4 | 3108.8 | 169.9             | 1241.7 | 1529.1 | 157.8  | 1243.0 | 3083.1 | 163.9             | 1232.7 | 3097.8 |
| 169.8                                             | 1236.6 | 3122.2 | 180.7             | 1243.2 | 1529.8 | 171.3  | 1246.9 | 3108.3 | 167.1             | 1245.7 | 3110.6 |
| 175.9                                             | 1240.4 | 3127.9 | 198.6             | 1333.2 | 1531.9 | 173.6  | 1352.7 | 3120.2 | 183.8             | 1323.8 | 3118.1 |
| 186.2                                             | 1350.4 | 3136.1 | 211.1             | 1353.2 | 1663.7 | 181.4  | 1381.0 | 3126.2 | 208.0             | 1353.5 | 3120.1 |
| 197.1                                             | 1353.0 | 3137.1 | 218.5             | 1378.5 | 1682.5 | 202.1  | 1384.5 | 3134.8 | 211.3             | 1368.5 | 3135.1 |
| 214.7                                             | 1376.3 | 3290.5 | 237.6             | 1383.2 | 1701.3 | 219.6  | 1388.3 | 3137.1 | 220.1             | 1382.2 | 3139.0 |
| 228.1                                             | 1381.3 | 3318.0 | 252.4             | 1386.4 | 1702.2 | 234.5  | 1399.4 | 3230.1 | 245.0             | 1391.7 | 3306.7 |
| 237.1                                             | 1396.5 | 3348.8 | 298.3             | 1399.8 | 1705.8 | 246.1  | 1408.8 | 3261.8 | 318.1             | 1411.7 | 3424.4 |
| 247.1                                             | 1467.7 | 3523.7 | 378.2             | 1467.3 | 3033.7 | 259.5  | 1466.6 | 3305.7 | 376.0             | 1467.1 | 3438.1 |
| 374.6                                             | 1468.3 | 3551.4 | 381.1             | 1468.5 | 3034.6 | 373.6  | 1467.4 | 3524.9 | 405.6             | 1469.7 | 3521.8 |
| 393.6                                             | 1469.2 | 3552.7 | 412.1             | 1468.6 | 3035.6 | 412.2  | 1468.6 | 3552.4 | 442.8             | 1470.1 | 3546.2 |
| 405.9                                             | 1471.9 | 3554.4 | 441.6             | 1470.1 | 3040.9 | 460.6  | 1471.4 | 3553.1 | 471.6             | 1473.4 | 3547.8 |
| 409.6                                             | 1508.3 | 3591.5 | 504.8             | 1472.8 | 3086.1 | 510.8  | 1508.3 | 3554.2 | 510.9             | 1504.2 | 3555.9 |
| 456.0                                             | 1509.4 | 4341.0 | 517.4             | 1508.5 | 3087.0 | 528.0  | 1509.5 | 3593.3 | 550.7             | 1508.7 | 3589.0 |
| OHp1                                              |        |        | eTS2              |        |        | rFA    |        |        | H <sub>2</sub> r2 |        |        |
| 26.1                                              | 699.8  | 1511.8 | -793.6            | 581.6  | 1511.6 | 27.6   | 605.7  | 1508.9 | 24.6              | 509.6  | 1507.0 |
| 31.3                                              | 942.8  | 1524.2 | 27.6              | 649.8  | 1525.7 | 30.9   | 891.4  | 1511.9 | 28.3              | 563.8  | 1509.0 |
| 43.5                                              | 980.1  | 1526.1 | 33.8              | 942.9  | 1526.6 | 37.0   | 927.3  | 1522.7 | 30.8              | 577.3  | 1512.0 |
| 47.3                                              | 987.2  | 1527.1 | 38.9              | 977.8  | 1528.9 | 41.0   | 977.0  | 1525.1 | 37.1              | 605.5  | 1522.7 |
| 49.3                                              | 990.4  | 1529.2 | 50.8              | 988.5  | 1530.5 | 47.4   | 986.0  | 1527.2 | 40.8              | 895.6  | 1525.2 |
| 56.7                                              | 996.0  | 1636.9 | 57.7              | 989.1  | 1595.4 | 56.5   | 993.2  | 1528.9 | 42.8              | 928.8  | 1527.3 |
| 71.0                                              | 999.5  | 1651.7 | 62.9              | 992.5  | 1659.8 | 66.4   | 996.2  | 1663.4 | 48.3              | 977.6  | 1529.1 |
| 72.8                                              | 1018.1 | 1662.3 | 69.2              | 1001.2 | 1667.4 | 70.5   | 1007.9 | 1669.6 | 58.4              | 985.8  | 1663.4 |
| 73.6                                              | 1033.1 | 1687.7 | 76.7              | 1017.6 | 1670.4 | 78.8   | 1036.2 | 1701.6 | 68.7              | 992.9  | 1669.4 |
| 81.1                                              | 1058.1 | 1805.6 | 83.2              | 1027.6 | 1694.0 | 98.6   | 1065.2 | 1715.8 | 73.5              | 996.7  | 1700.7 |

|        |        |        |       |        |        |        |        |        |       |        |        |
|--------|--------|--------|-------|--------|--------|--------|--------|--------|-------|--------|--------|
| 89.1   | 1058.5 | 3015.3 | 91.9  | 1051.4 | 3035.5 | 102.0  | 1068.4 | 2909.3 | 79.4  | 1007.8 | 1715.1 |
| 96.5   | 1066.2 | 3038.1 | 96.0  | 1059.1 | 3036.0 | 104.7  | 1076.9 | 3023.9 | 99.5  | 1036.4 | 2913.7 |
| 102.4  | 1071.1 | 3040.1 | 104.8 | 1065.6 | 3039.6 | 115.7  | 1082.6 | 3025.7 | 102.5 | 1063.7 | 3025.3 |
| 115.1  | 1073.1 | 3041.6 | 113.5 | 1073.1 | 3040.9 | 135.3  | 1085.5 | 3027.0 | 104.7 | 1067.9 | 3027.0 |
| 123.1  | 1163.1 | 3042.1 | 126.5 | 1077.0 | 3091.6 | 139.2  | 1095.3 | 3036.6 | 115.1 | 1076.3 | 3028.0 |
| 134.6  | 1202.4 | 3063.1 | 129.2 | 1202.7 | 3092.4 | 141.9  | 1167.5 | 3073.9 | 135.6 | 1082.3 | 3037.3 |
| 136.4  | 1221.2 | 3095.4 | 140.3 | 1223.6 | 3093.9 | 150.4  | 1197.5 | 3077.9 | 139.1 | 1084.8 | 3075.3 |
| 144.4  | 1227.7 | 3096.8 | 151.5 | 1227.8 | 3108.3 | 156.2  | 1231.8 | 3082.8 | 141.6 | 1094.4 | 3079.4 |
| 148.5  | 1230.5 | 3101.0 | 168.8 | 1228.7 | 3116.1 | 173.2  | 1235.0 | 3104.8 | 150.6 | 1168.8 | 3083.7 |
| 170.7  | 1265.5 | 3108.4 | 173.2 | 1238.7 | 3118.0 | 195.4  | 1248.7 | 3106.6 | 155.7 | 1197.9 | 3105.4 |
| 177.6  | 1353.3 | 3118.5 | 185.3 | 1352.4 | 3124.3 | 210.0  | 1315.2 | 3111.6 | 172.8 | 1232.1 | 3107.0 |
| 191.6  | 1356.7 | 3128.0 | 189.5 | 1357.2 | 3136.8 | 218.9  | 1351.6 | 3117.0 | 195.6 | 1235.0 | 3112.5 |
| 218.2  | 1360.6 | 3128.5 | 205.4 | 1358.3 | 3141.3 | 239.9  | 1359.5 | 3136.4 | 208.2 | 1248.8 | 3117.6 |
| 236.6  | 1376.7 | 3138.4 | 230.5 | 1371.9 | 3327.8 | 268.6  | 1377.3 | 3169.3 | 210.9 | 1317.6 | 3136.5 |
| 367.5  | 1415.3 | 3347.5 | 246.0 | 1383.0 | 3365.4 | 306.2  | 1388.5 | 3205.3 | 217.7 | 1351.6 | 3184.5 |
| 396.5  | 1463.9 | 3379.5 | 381.9 | 1462.5 | 3448.8 | 370.8  | 1463.9 | 3330.8 | 240.0 | 1359.5 | 3219.3 |
| 413.8  | 1465.0 | 3437.0 | 405.6 | 1467.0 | 3506.1 | 409.5  | 1467.9 | 3526.5 | 266.9 | 1377.0 | 3333.0 |
| 455.2  | 1467.3 | 3503.2 | 438.8 | 1469.8 | 3509.0 | 457.1  | 1468.8 | 3554.5 | 306.2 | 1388.2 | 3526.2 |
| 498.8  | 1472.4 | 3508.4 | 477.1 | 1471.1 | 3513.8 | 487.3  | 1471.5 | 3556.2 | 371.9 | 1463.0 | 3555.0 |
| 518.8  | 1506.6 | 3524.7 | 491.6 | 1506.4 | 3545.6 | 509.2  | 1472.7 | 3557.0 | 411.4 | 1468.0 | 3555.5 |
| 542.4  | 1508.6 | 3550.3 | 502.6 | 1508.0 | 3558.9 | 564.6  | 1506.7 | 3595.3 | 438.0 | 1468.7 | 3556.9 |
| 580.3  | 1509.1 | 3576.6 | 537.6 | 1509.6 | 3577.3 | 576.9  | 1507.0 | 3857.8 | 458.4 | 1471.0 | 3594.7 |
|        |        |        |       |        |        |        |        |        | 462.9 | 1472.3 | 3857.3 |
|        |        |        |       |        |        |        |        |        | 487.8 | 1506.8 | 4300.1 |
| CHTS2  |        |        | CHp2  |        |        | OHTS2  |        |        | OHp2  |        |        |
| -426.6 | 656.1  | 1518.8 | 19.6  | 590.6  | 1510.7 | -468.5 | 607.2  | 1510.7 | 15.6  | 940.5  | 1511.7 |
| 61.9   | 709.0  | 1520.1 | 25.9  | 614.2  | 1512.3 | 15.7   | 632.2  | 1512.3 | 26.6  | 985.6  | 1520.0 |
| 68.7   | 805.8  | 1523.2 | 35.7  | 905.8  | 1523.6 | 27.6   | 922.4  | 1521.7 | 32.2  | 987.1  | 1523.1 |
| 87.2   | 1000.0 | 1529.9 | 45.1  | 932.6  | 1524.5 | 33.5   | 934.0  | 1523.9 | 42.7  | 989.8  | 1524.4 |
| 93.6   | 1026.8 | 1531.8 | 51.2  | 987.6  | 1526.9 | 44.0   | 987.2  | 1524.6 | 44.3  | 999.7  | 1526.6 |
| 95.9   | 1028.3 | 1534.8 | 67.9  | 990.3  | 1527.3 | 50.3   | 989.8  | 1526.8 | 48.7  | 1005.8 | 1530.1 |
| 103.0  | 1035.7 | 1537.8 | 69.8  | 999.3  | 1530.8 | 65.7   | 997.9  | 1530.6 | 60.0  | 1012.8 | 1621.0 |
| 112.5  | 1039.3 | 1678.9 | 75.8  | 1005.6 | 1663.0 | 69.7   | 1005.2 | 1663.2 | 63.1  | 1026.2 | 1662.2 |
| 132.0  | 1041.6 | 1693.0 | 78.7  | 1040.0 | 1696.5 | 75.8   | 1034.3 | 1692.9 | 70.4  | 1040.0 | 1685.2 |
| 140.1  | 1043.6 | 1711.8 | 88.0  | 1043.5 | 1711.7 | 79.2   | 1042.1 | 1710.0 | 71.4  | 1041.6 | 1694.3 |
| 149.1  | 1049.6 | 1733.1 | 99.5  | 1057.5 | 1722.7 | 88.3   | 1051.1 | 1717.6 | 91.1  | 1058.0 | 3036.7 |
| 160.6  | 1052.9 | 1861.4 | 114.1 | 1065.7 | 2945.3 | 98.9   | 1065.4 | 2963.8 | 102.1 | 1065.8 | 3037.4 |
| 165.9  | 1095.2 | 2763.5 | 123.2 | 1074.7 | 2966.1 | 112.1  | 1073.5 | 2991.6 | 107.4 | 1072.6 | 3039.4 |
| 175.7  | 1115.1 | 2852.1 | 130.5 | 1076.1 | 3025.9 | 127.4  | 1074.5 | 3027.7 | 118.4 | 1074.0 | 3041.4 |
| 177.6  | 1117.1 | 2923.4 | 133.8 | 1079.8 | 3035.3 | 131.7  | 1077.5 | 3036.0 | 131.9 | 1083.4 | 3054.9 |
| 209.1  | 1132.8 | 2923.8 | 137.5 | 1098.1 | 3036.0 | 137.2  | 1093.8 | 3038.3 | 136.1 | 1202.0 | 3091.8 |
| 230.8  | 1168.4 | 2926.0 | 143.6 | 1195.9 | 3039.1 | 137.8  | 1183.7 | 3039.6 | 139.9 | 1205.2 | 3093.9 |
| 244.2  | 1235.0 | 2937.1 | 152.4 | 1200.0 | 3075.7 | 140.1  | 1200.3 | 3079.5 | 146.9 | 1226.3 | 3097.4 |
| 257.6  | 1247.9 | 2960.3 | 163.6 | 1233.8 | 3087.6 | 151.8  | 1230.4 | 3090.2 | 159.3 | 1228.4 | 3108.8 |
| 265.1  | 1273.7 | 2970.8 | 178.2 | 1239.1 | 3089.6 | 170.0  | 1237.7 | 3091.3 | 168.0 | 1233.2 | 3116.5 |
| 322.1  | 1289.8 | 2978.2 | 205.3 | 1247.1 | 3106.9 | 177.7  | 1244.9 | 3110.5 | 184.0 | 1353.6 | 3118.4 |
| 339.9  | 1305.8 | 2991.3 | 213.8 | 1256.1 | 3110.5 | 204.8  | 1256.2 | 3114.5 | 196.5 | 1357.6 | 3122.8 |
| 344.7  | 1315.9 | 2998.2 | 221.7 | 1354.1 | 3112.9 | 215.1  | 1354.2 | 3116.4 | 215.6 | 1368.9 | 3137.5 |
| 348.2  | 1374.4 | 3000.6 | 232.5 | 1355.9 | 3116.2 | 225.1  | 1363.0 | 3126.0 | 238.5 | 1377.6 | 3141.6 |
| 349.3  | 1402.3 | 3006.5 | 261.9 | 1381.9 | 3126.1 | 233.6  | 1378.1 | 3140.1 | 373.5 | 1393.1 | 3307.1 |
| 354.2  | 1408.1 | 3027.5 | 364.2 | 1388.1 | 3140.0 | 296.2  | 1386.6 | 3151.5 | 400.5 | 1420.5 | 3413.6 |
| 412.1  | 1409.5 | 3036.8 | 391.0 | 1399.8 | 3255.7 | 364.8  | 1396.2 | 3311.8 | 440.2 | 1437.7 | 3432.4 |
| 428.9  | 1428.3 | 3245.6 | 417.5 | 1423.2 | 3337.4 | 393.8  | 1426.8 | 3346.5 | 450.2 | 1456.8 | 3443.3 |
| 444.0  | 1465.3 | 3399.6 | 463.8 | 1465.4 | 3524.2 | 415.0  | 1465.5 | 3523.8 | 470.7 | 1465.6 | 3508.2 |
| 467.5  | 1477.6 | 3425.6 | 466.9 | 1467.7 | 3544.1 | 463.0  | 1467.8 | 3544.0 | 473.4 | 1468.8 | 3511.1 |
| 475.4  | 1481.8 | 3426.2 | 487.4 | 1471.2 | 3546.7 | 496.1  | 1471.2 | 3546.7 | 490.4 | 1472.2 | 3530.3 |
| 543.0  | 1483.9 | 3436.0 | 502.2 | 1472.4 | 3552.5 | 515.7  | 1472.5 | 3552.1 | 527.3 | 1503.6 | 3545.7 |
| 557.9  | 1485.3 | 3458.8 | 525.1 | 1503.6 | 3593.1 | 552.8  | 1503.1 | 3592.5 | 559.2 | 1506.3 | 3580.2 |
| 635.9  | 1514.8 | 3719.5 | 560.5 | 1504.0 | 3828.6 | 562.0  | 1504.0 | 3827.8 | 577.7 | 1509.5 | 3588.3 |

**Table S10.** Harmonic vibrational frequencies ( $\text{cm}^{-1}$ ) for the reactants, products, and intermediates of the  $\text{Li}(\text{NH}_2\text{CH}_2\text{CH}_3)_4 + \text{CO}_2 + 2 \text{H}_2 \rightarrow \text{Li}(\text{NH}_2\text{CH}_2\text{CH}_3)_4 + \text{CH}_2(\text{OH})_2$  reaction pathway.

| $\text{Li}(\text{NH}_2\text{CH}_2\text{CH}_3)_4$ |        |        | $\text{CO}_2\text{r}$ |        |        | eTS1  |        |        | $\text{CO}_2\text{p}$ |        |        |
|--------------------------------------------------|--------|--------|-----------------------|--------|--------|-------|--------|--------|-----------------------|--------|--------|
| 21.0                                             | 988.6  | 1530.0 | 13.2                  | 793.3  | 1497.5 | -2.9  | 904.1  | 1512.7 | 13.5                  | 801.4  | 1500.4 |
| 26.6                                             | 995.9  | 1614.2 | 18.1                  | 814.7  | 1498.9 | 10.5  | 904.8  | 1513.8 | 18.3                  | 813.9  | 1502.7 |
| 28.7                                             | 1018.8 | 1635.3 | 23.3                  | 901.1  | 1499.2 | 13.4  | 969.4  | 1517.5 | 27.8                  | 902.4  | 1502.8 |
| 34.1                                             | 1023.0 | 1647.9 | 25.8                  | 903.3  | 1501.1 | 17.9  | 1002.3 | 1518.8 | 31.1                  | 904.6  | 1504.0 |
| 36.4                                             | 1026.4 | 1655.9 | 31.3                  | 903.9  | 1501.7 | 22.9  | 1004.5 | 1620.8 | 33.8                  | 907.2  | 1505.7 |
| 37.6                                             | 1030.2 | 3031.2 | 35.6                  | 905.1  | 1509.4 | 27.5  | 1019.0 | 1643.0 | 44.4                  | 907.9  | 1517.0 |
| 43.3                                             | 1033.8 | 3044.2 | 36.3                  | 981.1  | 1513.0 | 29.1  | 1023.5 | 1657.6 | 49.4                  | 960.4  | 1517.4 |
| 45.9                                             | 1084.2 | 3046.0 | 38.9                  | 995.1  | 1516.9 | 31.2  | 1032.6 | 1665.0 | 53.3                  | 1014.0 | 1519.1 |
| 55.6                                             | 1086.8 | 3046.1 | 41.7                  | 999.7  | 1518.4 | 35.9  | 1036.4 | 3044.0 | 61.7                  | 1018.7 | 1537.2 |
| 72.9                                             | 1089.4 | 3046.5 | 44.1                  | 1021.6 | 1531.4 | 43.2  | 1040.6 | 3044.4 | 62.8                  | 1027.2 | 1661.7 |
| 74.7                                             | 1109.9 | 3056.0 | 50.3                  | 1025.0 | 1614.8 | 56.4  | 1084.3 | 3046.3 | 70.6                  | 1029.3 | 1674.7 |
| 86.6                                             | 1169.5 | 3061.5 | 51.4                  | 1027.8 | 1640.1 | 68.3  | 1085.9 | 3046.8 | 77.3                  | 1055.8 | 1691.1 |
| 94.9                                             | 1172.2 | 3063.6 | 58.4                  | 1030.0 | 1654.0 | 70.9  | 1087.6 | 3051.6 | 89.8                  | 1081.4 | 1693.7 |
| 111.5                                            | 1180.7 | 3082.9 | 62.1                  | 1035.0 | 1658.8 | 73.7  | 1091.5 | 3054.7 | 91.0                  | 1084.1 | 1712.0 |
| 127.5                                            | 1188.6 | 3083.1 | 73.5                  | 1084.1 | 2416.7 | 79.8  | 1167.3 | 3056.1 | 98.3                  | 1088.1 | 3024.6 |
| 141.0                                            | 1279.7 | 3089.5 | 81.8                  | 1087.3 | 3029.3 | 96.2  | 1179.1 | 3066.7 | 111.4                 | 1090.9 | 3038.6 |
| 163.1                                            | 1280.1 | 3090.2 | 90.2                  | 1090.3 | 3044.1 | 104.2 | 1181.4 | 3082.8 | 130.0                 | 1099.0 | 3042.1 |
| 181.6                                            | 1283.6 | 3109.3 | 100.5                 | 1109.0 | 3046.2 | 110.2 | 1184.6 | 3085.5 | 130.9                 | 1119.8 | 3043.0 |
| 255.7                                            | 1285.1 | 3111.5 | 110.8                 | 1170.0 | 3047.2 | 114.0 | 1279.3 | 3092.3 | 151.2                 | 1165.1 | 3044.4 |
| 258.7                                            | 1353.1 | 3111.9 | 128.1                 | 1177.0 | 3051.5 | 120.9 | 1285.3 | 3093.4 | 161.7                 | 1199.7 | 3044.7 |
| 259.1                                            | 1389.0 | 3113.6 | 143.0                 | 1181.7 | 3054.3 | 150.1 | 1286.3 | 3108.9 | 172.1                 | 1210.8 | 3045.7 |
| 274.3                                            | 1392.2 | 3114.8 | 154.5                 | 1192.1 | 3058.0 | 166.3 | 1287.8 | 3110.5 | 187.5                 | 1219.5 | 3067.8 |
| 319.5                                            | 1394.8 | 3117.9 | 184.7                 | 1279.5 | 3067.7 | 168.2 | 1389.2 | 3113.2 | 215.3                 | 1279.1 | 3084.1 |
| 353.1                                            | 1395.8 | 3118.6 | 255.8                 | 1281.6 | 3078.2 | 175.5 | 1389.9 | 3116.7 | 223.4                 | 1287.8 | 3087.8 |
| 365.7                                            | 1399.3 | 3118.9 | 258.6                 | 1283.7 | 3080.9 | 257.4 | 1393.3 | 3118.2 | 258.6                 | 1299.1 | 3089.3 |
| 392.6                                            | 1400.2 | 3364.3 | 258.9                 | 1285.2 | 3085.3 | 258.7 | 1396.5 | 3120.2 | 270.9                 | 1302.3 | 3091.3 |
| 412.9                                            | 1413.4 | 3373.0 | 270.3                 | 1350.8 | 3092.7 | 260.5 | 1397.9 | 3120.7 | 272.4                 | 1348.5 | 3108.5 |
| 438.9                                            | 1424.2 | 3417.1 | 330.7                 | 1372.6 | 3109.4 | 261.2 | 1399.9 | 3120.9 | 277.3                 | 1358.9 | 3109.5 |
| 450.9                                            | 1426.3 | 3433.6 | 361.7                 | 1391.1 | 3114.5 | 410.0 | 1401.6 | 3324.6 | 346.8                 | 1394.8 | 3110.4 |
| 467.7                                            | 1427.1 | 3437.5 | 366.3                 | 1394.2 | 3115.4 | 424.2 | 1403.8 | 3373.6 | 367.5                 | 1395.5 | 3117.4 |
| 490.0                                            | 1439.7 | 3465.2 | 394.5                 | 3543.7 | 3116.4 | 431.8 | 1424.9 | 3461.9 | 399.2                 | 1396.6 | 3117.4 |
| 503.3                                            | 1497.0 | 3525.9 | 409.1                 | 1394.7 | 3118.4 | 437.0 | 1425.4 | 3476.4 | 409.1                 | 1398.4 | 3118.6 |
| 523.2                                            | 1497.7 | 3547.2 | 430.6                 | 1396.6 | 3118.7 | 447.1 | 1427.2 | 3486.1 | 427.5                 | 1414.3 | 3124.4 |
| 784.5                                            | 1497.9 |        | 449.0                 | 1398.8 | 3119.0 | 454.4 | 1427.6 | 3488.9 | 447.3                 | 1416.3 | 3124.6 |
| 789.1                                            | 1498.0 |        | 467.7                 | 1400.1 | 3119.7 | 459.0 | 1495.6 | 3546.6 | 495.6                 | 1420.1 | 3266.2 |
| 790.5                                            | 1499.3 |        | 489.8                 | 1415.8 | 3370.2 | 486.7 | 1497.3 | 3557.2 | 526.1                 | 1425.9 | 3308.5 |
| 811.3                                            | 1500.9 |        | 508.0                 | 1424.2 | 3406.8 | 784.3 | 1498.3 |        | 536.9                 | 1426.8 | 3339.8 |
| 900.9                                            | 1501.5 |        | 517.1                 | 1426.7 | 3426.5 | 790.0 | 1499.1 |        | 552.4                 | 1427.5 | 3507.1 |
| 902.5                                            | 1508.7 |        | 534.7                 | 1427.7 | 3458.6 | 791.0 | 1499.6 |        | 618.7                 | 1453.3 | 3534.0 |
| 903.0                                            | 1513.1 |        | 544.9                 | 1441.8 | 3461.6 | 793.3 | 1499.8 |        | 746.0                 | 1498.4 | 3534.4 |
| 903.8                                            | 1515.8 |        | 783.0                 | 1496.9 | 3479.1 | 901.3 | 1501.9 |        | 791.3                 | 1499.1 | 3536.3 |
| 977.5                                            | 1517.9 |        | 790.8                 | 1497.4 | 3541.8 | 902.6 | 1502.1 |        | 798.4                 | 1499.4 | 3575.3 |
| $\text{H}_2\text{r1}$                            |        |        | CHTS1                 |        |        | CHp1  |        |        | OHTS1                 |        |        |
| 17.0                                             | 746.1  | 1499.5 | -467.6                | 799.0  | 1499.6 | 11.8  | 798.4  | 1499.4 | -1375.4               | 798.9  | 1499.7 |
| 20.0                                             | 1498.5 | 1500.2 | 13.9                  | 800.7  | 1499.7 | 16.4  | 800.6  | 1499.8 | 15.2                  | 814.2  | 1499.9 |
| 26.0                                             | 790.9  | 1502.6 | 15.2                  | 814.0  | 1500.4 | 27.2  | 813.6  | 1502.6 | 21.0                  | 820.2  | 1501.2 |
| 31.1                                             | 799.5  | 1503.0 | 27.7                  | 902.3  | 1502.7 | 28.4  | 902.1  | 1502.7 | 23.8                  | 902.9  | 1502.9 |
| 33.2                                             | 801.3  | 1504.0 | 30.8                  | 904.8  | 1503.0 | 31.7  | 904.9  | 1503.2 | 29.5                  | 904.9  | 1503.4 |
| 43.7                                             | 813.3  | 1505.7 | 35.1                  | 907.5  | 1503.5 | 37.5  | 907.6  | 1504.8 | 33.7                  | 906.8  | 1504.9 |
| 48.3                                             | 902.5  | 1517.3 | 43.8                  | 908.0  | 1505.4 | 45.4  | 908.2  | 1516.7 | 36.3                  | 907.5  | 1516.8 |
| 49.6                                             | 904.7  | 1517.6 | 48.5                  | 962.0  | 1517.0 | 50.8  | 958.1  | 1517.2 | 42.7                  | 967.3  | 1518.1 |
| 52.9                                             | 907.2  | 1519.1 | 53.1                  | 1013.5 | 1517.6 | 53.6  | 1015.3 | 1518.7 | 48.5                  | 1006.9 | 1519.1 |
| 58.4                                             | 908.0  | 1537.6 | 54.1                  | 1018.9 | 1519.3 | 61.7  | 1019.0 | 1537.5 | 52.7                  | 1020.7 | 1537.1 |
| 61.9                                             | 964.0  | 1661.9 | 62.3                  | 1028.6 | 1537.3 | 66.0  | 1030.1 | 1653.4 | 57.5                  | 1026.5 | 1661.2 |
| 70.1                                             | 1014.3 | 1674.5 | 69.0                  | 1029.8 | 1661.7 | 67.3  | 1031.5 | 1661.2 | 62.9                  | 1029.5 | 1669.2 |
| 71.2                                             | 1020.2 | 1691.5 | 76.2                  | 1057.1 | 1677.7 | 71.4  | 1061.8 | 1681.7 | 69.8                  | 1044.6 | 1685.1 |
| 77.3                                             | 1028.4 | 1693.7 | 84.0                  | 1082.8 | 1695.5 | 81.2  | 1086.2 | 1700.5 | 82.3                  | 1063.5 | 1697.6 |
| 84.6                                             | 1029.8 | 1711.8 | 91.1                  | 1084.7 | 1699.3 | 89.2  | 1086.4 | 1704.4 | 89.6                  | 1081.9 | 1732.0 |
| 88.1                                             | 1055.8 | 3024.8 | 94.1                  | 1088.2 | 1706.4 | 93.8  | 1087.7 | 2896.4 | 91.9                  | 1087.8 | 3024.7 |
| 91.7                                             | 1081.6 | 3039.3 | 99.9                  | 1092.3 | 3023.6 | 105.2 | 1089.0 | 3018.5 | 99.2                  | 1090.0 | 3029.8 |
| 100.2                                            | 1084.2 | 3041.9 | 112.9                 | 1100.9 | 3038.5 | 111.9 | 1096.4 | 3032.9 | 107.8                 | 1091.6 | 3041.1 |
| 105.1                                            | 1088.0 | 3043.8 | 131.3                 | 1109.1 | 3043.1 | 118.3 | 1106.2 | 3040.4 | 114.7                 | 1095.6 | 3045.1 |
| 113.7                                            | 1090.9 | 3044.3 | 137.2                 | 1120.2 | 3043.4 | 128.8 | 1122.4 | 3042.3 | 131.1                 | 1116.6 | 3045.3 |
| 130.4                                            | 1098.9 | 3044.9 | 160.1                 | 1165.3 | 3044.5 | 132.9 | 1164.5 | 3042.6 | 152.9                 | 1166.4 | 3046.0 |
| 131.0                                            | 1119.6 | 3046.3 | 172.3                 | 1200.6 | 3045.2 | 154.5 | 1204.3 | 3043.7 | 157.0                 | 1191.2 | 3046.3 |
| 152.0                                            | 1166.1 | 3067.6 | 187.8                 | 1215.9 | 3045.8 | 162.6 | 1222.3 | 3045.3 | 184.1                 | 1206.3 | 3047.4 |
| 161.9                                            | 1200.2 | 3081.9 | 199.3                 | 1221.0 | 3068.2 | 178.2 | 1227.8 | 3066.1 | 188.5                 | 1217.1 | 3068.5 |
| 172.0                                            | 1212.9 | 3087.7 | 224.2                 | 1279.1 | 3082.9 | 188.8 | 1278.8 | 3080.2 | 206.6                 | 1280.7 | 3077.5 |
| 187.4                                            | 1220.5 | 3089.8 | 258.4                 | 1288.9 | 3085.2 | 224.0 | 1290.9 | 3084.0 | 258.5                 | 1284.6 | 3079.0 |



|       |        |        |       |        |        |       |        |        |       |        |        |
|-------|--------|--------|-------|--------|--------|-------|--------|--------|-------|--------|--------|
| 141.1 | 1071.4 | 1709.6 | 89.6  | 1057.1 | 1703.4 | 76.7  | 1058.6 | 1686.6 | 81.4  | 1065.8 | 1692.8 |
| 156.5 | 1076.6 | 1720.6 | 101.3 | 1073.3 | 1718.3 | 82.5  | 1083.8 | 1698.9 | 88.1  | 1084.6 | 3034.5 |
| 170.8 | 1096.6 | 1836.0 | 110.4 | 1085.7 | 2940.9 | 89.5  | 1088.3 | 2920.8 | 93.5  | 1087.6 | 3043.0 |
| 184.6 | 1098.8 | 2765.5 | 116.1 | 1087.7 | 2964.4 | 100.6 | 1091.6 | 2938.5 | 101.0 | 1088.4 | 3043.5 |
| 191.4 | 1118.6 | 2899.4 | 128.0 | 1100.4 | 3016.0 | 107.5 | 1098.3 | 3021.4 | 120.0 | 1092.9 | 3045.0 |
| 202.7 | 1132.7 | 2914.1 | 134.5 | 1119.0 | 3025.8 | 125.2 | 1108.9 | 3040.2 | 133.8 | 1110.3 | 3046.6 |
| 214.7 | 1147.4 | 2926.2 | 157.4 | 1128.0 | 3029.9 | 128.3 | 1124.0 | 3040.9 | 143.9 | 1166.8 | 3047.9 |
| 219.4 | 1155.2 | 2934.7 | 173.6 | 1164.6 | 3036.6 | 144.9 | 1155.0 | 3042.2 | 148.5 | 1192.7 | 3050.4 |
| 236.1 | 1188.1 | 2937.1 | 180.1 | 1194.9 | 3043.6 | 159.6 | 1164.2 | 3045.1 | 175.5 | 1195.7 | 3053.5 |
| 245.0 | 1241.9 | 2939.2 | 191.3 | 1201.8 | 3044.3 | 168.0 | 1192.9 | 3045.3 | 185.7 | 1200.1 | 3065.9 |
| 272.9 | 1243.3 | 2940.1 | 200.7 | 1217.6 | 3044.9 | 172.7 | 1206.5 | 3046.0 | 190.7 | 1212.6 | 3070.8 |
| 305.5 | 1251.0 | 2940.3 | 232.6 | 1233.8 | 3072.3 | 185.7 | 1222.5 | 3066.4 | 258.9 | 1279.3 | 3082.9 |
| 335.7 | 1272.2 | 2946.3 | 258.3 | 1253.3 | 3073.4 | 224.1 | 1272.2 | 3068.5 | 265.1 | 1280.8 | 3086.1 |
| 370.1 | 1297.8 | 2961.0 | 266.4 | 1280.3 | 3074.8 | 258.6 | 1278.6 | 3074.6 | 270.0 | 1290.3 | 3090.4 |
| 400.2 | 1311.7 | 2962.3 | 282.3 | 1290.6 | 3086.9 | 263.9 | 1282.3 | 3086.0 | 278.8 | 1294.3 | 3107.5 |
| 400.7 | 1315.1 | 2980.0 | 284.7 | 1294.7 | 3094.4 | 266.0 | 1290.0 | 3091.9 | 341.0 | 1356.2 | 3110.9 |
| 404.7 | 1315.2 | 2980.5 | 342.7 | 1302.9 | 3101.2 | 271.3 | 1292.4 | 3107.1 | 354.4 | 1393.8 | 3111.5 |
| 408.5 | 1325.4 | 2997.5 | 364.3 | 1353.0 | 3102.4 | 331.6 | 1299.0 | 3107.9 | 378.9 | 1394.6 | 3112.1 |
| 410.9 | 1394.5 | 2999.9 | 376.8 | 1357.1 | 3107.9 | 343.6 | 1359.1 | 3109.2 | 406.5 | 1396.2 | 3117.4 |
| 416.5 | 1401.4 | 3002.9 | 404.8 | 1359.8 | 3110.4 | 368.7 | 1393.9 | 3114.3 | 437.7 | 1397.6 | 3117.6 |
| 431.0 | 1413.1 | 3005.6 | 413.9 | 1391.9 | 3116.8 | 385.6 | 1395.2 | 3116.3 | 446.5 | 1398.9 | 3122.6 |
| 462.3 | 1414.4 | 3006.2 | 426.1 | 1398.3 | 3117.1 | 410.9 | 1397.4 | 3117.7 | 448.7 | 1402.1 | 3122.7 |
| 463.1 | 1416.4 | 3006.9 | 447.7 | 1400.2 | 3118.0 | 433.8 | 1398.7 | 3122.3 | 481.4 | 1411.5 | 3139.6 |
| 496.7 | 1418.3 | 3015.2 | 459.5 | 1412.7 | 3120.1 | 441.3 | 1406.4 | 3122.6 | 488.9 | 1412.1 | 3282.5 |
| 500.2 | 1430.1 | 3016.4 | 477.4 | 1413.9 | 3121.1 | 479.6 | 1410.8 | 3266.0 | 494.1 | 1423.2 | 3398.0 |
| 507.2 | 1434.3 | 3019.3 | 500.4 | 1416.2 | 3225.6 | 518.9 | 1413.3 | 3327.3 | 515.0 | 1426.0 | 3423.7 |
| 546.7 | 1436.5 | 3250.1 | 510.7 | 1423.4 | 3346.2 | 524.7 | 1423.3 | 3410.0 | 551.9 | 1427.1 | 3456.5 |
| 555.0 | 1441.2 | 3380.4 | 548.9 | 1426.2 | 3505.9 | 536.6 | 1424.5 | 3507.4 | 567.0 | 1427.8 | 3491.8 |
| 630.5 | 1443.7 | 3402.9 | 580.5 | 1427.2 | 3528.1 | 563.6 | 1426.9 | 3534.7 | 580.8 | 1438.5 | 3501.6 |
| 667.7 | 1445.9 | 3410.8 | 590.5 | 1449.7 | 3529.7 | 597.0 | 1443.0 | 3536.0 | 791.9 | 1441.7 | 3502.4 |
| 702.7 | 1459.1 | 3413.1 | 631.9 | 1453.6 | 3534.7 | 607.5 | 1449.2 | 3543.5 | 795.1 | 1498.1 | 3534.9 |
| 808.6 | 1473.7 | 3439.2 | 792.7 | 1497.1 | 3575.2 | 790.2 | 1497.5 | 3576.1 | 795.2 | 1499.2 | 3565.0 |
| 848.9 | 1505.9 | 3695.9 | 800.4 | 1497.7 | 3836.6 | 795.3 | 1498.7 | 3842.6 | 810.6 | 1499.4 | 3570.8 |

**Table S11.** Harmonic vibrational frequencies (cm<sup>-1</sup>) for the reactants, products, and intermediates of the Li(H<sub>2</sub>O)<sub>4</sub> + CO<sub>2</sub> + 2H<sub>2</sub> → Li(H<sub>2</sub>O)<sub>4</sub> + CH<sub>2</sub>(OH)<sub>2</sub> reaction pathway.

| Li(H <sub>2</sub> O) <sub>4</sub> |        |        | CO <sub>2</sub> r |        |        | eTS1   |        |        | CO <sub>2</sub> p |        |        |
|-----------------------------------|--------|--------|-------------------|--------|--------|--------|--------|--------|-------------------|--------|--------|
| 56.4                              | 376.2  | 3698.4 | 15.8              | 251.8  | 1396.7 | -544.7 | 228.6  | 1275.2 | 25.8              | 340.6  | 1368.3 |
| 60.2                              | 392.2  | 3743.8 | 28.1              | 274.1  | 1566.7 | 17.5   | 253.3  | 1583.0 | 41.9              | 342.3  | 1593.6 |
| 78.8                              | 413.5  | 3750.1 | 53.5              | 363.0  | 1586.3 | 34.8   | 274.4  | 1588.2 | 60.0              | 367.9  | 1596.7 |
| 80.3                              | 452.2  | 3864.1 | 56.5              | 368.5  | 1598.9 | 46.3   | 321.2  | 1609.4 | 91.3              | 396.4  | 1677.3 |
| 116.0                             | 460.1  | 3865.4 | 66.4              | 379.6  | 1630.0 | 55.3   | 332.5  | 1613.9 | 101.4             | 437.4  | 1684.6 |
| 125.0                             | 499.9  |        | 79.7              | 395.9  | 2444.6 | 73.8   | 364.0  | 2320.8 | 117.4             | 453.1  | 1715.5 |
| 143.0                             | 574.7  |        | 97.5              | 425.2  | 3518.5 | 78.2   | 364.8  | 3571.2 | 130.3             | 498.1  | 2702.6 |
| 197.0                             | 1557.7 |        | 103.9             | 442.7  | 3543.3 | 93.8   | 385.1  | 3617.5 | 149.1             | 534.0  | 2815.3 |
| 197.3                             | 1580.7 |        | 109.6             | 480.3  | 3597.6 | 96.9   | 412.3  | 3646.6 | 197.5             | 621.8  | 3755.7 |
| 254.1                             | 1599.5 |        | 126.9             | 486.6  | 3661.4 | 118.6  | 446.1  | 3675.9 | 219.7             | 652.0  | 3756.1 |
| 271.0                             | 1602.9 |        | 148.9             | 532.4  | 3751.5 | 143.2  | 476.0  | 3731.0 | 225.2             | 658.3  | 3904.1 |
| 316.9                             | 3465.5 |        | 161.7             | 562.9  | 3757.3 | 156.9  | 500.4  | 3766.9 | 254.3             | 742.2  | 3904.7 |
| 327.1                             | 3471.5 |        | 193.4             | 655.9  | 3776.3 | 173.0  | 543.4  | 3830.8 | 285.8             | 1022.0 | 3925.1 |
| 371.1                             | 3686.1 |        | 219.8             | 668.6  | 3895.7 | 208.4  | 587.8  | 3879.6 | 302.4             | 1048.7 | 3925.4 |
| H <sub>2</sub> r1                 |        |        | CHTS1             |        |        | CHp1   |        |        | OHTS1             |        |        |
| 12.8                              | 299.4  | 1039.2 | -1160.3           | 344.8  | 1227.6 | 20.7   | 319.2  | 1408.2 | -1055.8           | 330.9  | 1324.9 |
| 24.4                              | 337.1  | 1367.7 | 27.0              | 353.2  | 1290.2 | 24.2   | 352.6  | 1419.5 | 44.8              | 336.2  | 1417.3 |
| 27.7                              | 339.7  | 1594.0 | 42.7              | 380.0  | 1449.7 | 34.0   | 361.3  | 1585.8 | 61.5              | 401.1  | 1596.8 |
| 43.3                              | 349.4  | 1596.9 | 61.6              | 397.2  | 1592.7 | 43.3   | 383.4  | 1595.7 | 82.9              | 432.9  | 1609.1 |
| 60.0                              | 365.0  | 1677.8 | 91.9              | 417.0  | 1595.9 | 64.0   | 410.5  | 1629.6 | 90.0              | 458.7  | 1656.5 |
| 90.7                              | 388.2  | 1685.4 | 101.5             | 443.0  | 1685.7 | 93.3   | 458.6  | 1699.9 | 97.1              | 485.4  | 1688.6 |
| 100.2                             | 393.4  | 1717.0 | 106.0             | 455.5  | 1697.1 | 107.9  | 459.1  | 1707.3 | 126.5             | 526.9  | 1730.1 |
| 115.2                             | 437.6  | 2741.7 | 116.7             | 502.6  | 1711.8 | 112.5  | 532.7  | 2387.1 | 130.2             | 561.9  | 3047.1 |
| 130.1                             | 453.5  | 2849.4 | 132.9             | 538.2  | 2669.1 | 124.4  | 580.9  | 2507.6 | 152.7             | 591.6  | 3115.8 |
| 144.8                             | 492.4  | 3761.3 | 147.9             | 626.7  | 2766.7 | 138.4  | 645.9  | 2949.3 | 164.6             | 619.1  | 3221.7 |
| 174.4                             | 526.5  | 3763.2 | 196.0             | 658.1  | 3755.5 | 165.0  | 693.5  | 3712.8 | 188.4             | 663.7  | 3519.8 |
| 193.9                             | 619.1  | 3903.6 | 218.7             | 664.8  | 3755.6 | 204.0  | 696.9  | 3713.4 | 202.9             | 713.8  | 3793.5 |
| 216.0                             | 646.6  | 3904.2 | 253.7             | 747.6  | 3906.9 | 218.1  | 772.6  | 3910.8 | 221.5             | 766.2  | 3857.5 |
| 225.4                             | 653.6  | 3925.9 | 257.9             | 1045.1 | 3906.9 | 237.6  | 1083.0 | 3910.9 | 252.2             | 909.7  | 3874.2 |
| 253.3                             | 742.2  | 3926.5 | 304.5             | 1067.4 | 3925.8 | 256.8  | 1125.8 | 3922.3 | 266.2             | 940.3  | 3884.5 |
| 284.1                             | 1011.5 | 4357.5 | 308.6             | 1113.7 | 3926.2 | 288.3  | 1144.5 | 3922.7 | 313.4             | 1082.1 | 3931.9 |
| OHp1                              |        |        | eTS2              |        |        | rFA    |        |        | H <sub>2</sub> r2 |        |        |
| 16.1                              | 350.6  | 1593.5 | -550.8            | 336.1  | 1609.5 | 40.5   | 364.6  | 1618.5 | 11.7              | 306.1  | 1176.1 |
| 38.6                              | 382.9  | 1608.4 | -191.6            | 394.5  | 1656.3 | 75.9   | 378.8  | 1646.6 | 27.9              | 323.1  | 1309.0 |
| 49.8                              | 410.3  | 1641.8 | -143.1            | 432.9  | 1695.9 | 84.3   | 462.1  | 1652.4 | 38.6              | 335.6  | 1420.3 |
| 65.0                              | 412.4  | 1882.1 | -102.2            | 481.0  | 1751.5 | 96.5   | 496.7  | 1697.1 | 45.3              | 349.3  | 1612.4 |
| 75.3                              | 440.0  | 3025.8 | 82.3              | 502.0  | 2927.3 | 104.2  | 536.6  | 2749.9 | 62.7              | 356.2  | 1648.8 |
| 90.4                              | 474.3  | 3282.5 | 92.2              | 537.2  | 3107.4 | 110.4  | 578.4  | 2955.1 | 92.9              | 389.8  | 1663.1 |
| 107.4                             | 500.9  | 3381.9 | 107.2             | 575.1  | 3127.9 | 125.8  | 613.3  | 3003.4 | 112.5             | 453.8  | 1715.2 |
| 114.6                             | 537.5  | 3455.1 | 121.6             | 615.9  | 3212.4 | 159.9  | 628.2  | 3191.8 | 122.5             | 503.1  | 2884.5 |
| 118.1                             | 571.2  | 3580.4 | 141.8             | 628.1  | 3707.5 | 215.1  | 663.7  | 3738.9 | 132.3             | 533.2  | 2984.1 |
| 130.0                             | 611.5  | 3649.2 | 165.2             | 638.6  | 3756.7 | 231.2  | 802.6  | 3869.6 | 139.3             | 571.3  | 3113.1 |
| 176.0                             | 732.8  | 3698.6 | 184.5             | 697.7  | 3833.3 | 245.3  | 940.5  | 3885.2 | 141.7             | 582.0  | 3238.1 |
| 196.0                             | 870.1  | 3792.2 | 195.6             | 860.5  | 3902.6 | 253.8  | 982.0  | 3903.6 | 226.4             | 639.5  | 3728.7 |
| 215.7                             | 1055.1 | 3802.3 | 233.8             | 986.5  | 3908.6 | 282.1  | 1048.9 | 3907.4 | 237.4             | 673.9  | 3872.8 |
| 233.1                             | 1165.5 | 3906.9 | 251.4             | 1042.9 | 3909.0 | 287.5  | 1062.1 | 3922.6 | 248.3             | 872.0  | 3898.6 |
| 243.2                             | 1346.4 |        | 261.6             | 1292.2 |        | 308.4  | 1195.1 |        | 255.3             | 905.6  | 3907.6 |
| 298.6                             | 1421.4 |        | 290.9             | 1400.3 |        | 325.6  | 1318.3 |        | 285.0             | 937.8  | 3912.9 |
| 315.8                             | 1525.3 |        | 309.8             | 1573.9 |        | 340.2  | 1446.0 |        | 296.1             | 1022.9 | 3915.3 |
| CHTS2                             |        |        | CHp2              |        |        | OHTS2  |        |        | OHp2              |        |        |
| -782.0                            | 355.0  | 1287.9 | 37.1              | 362.0  | 1375.1 | -192.0 | 355.2  | 1282.8 | 38.4              | 386.1  | 1443.4 |
| -37.0                             | 380.3  | 1345.1 | 47.7              | 364.3  | 1442.5 | 52.2   | 413.8  | 1435.7 | 49.4              | 409.4  | 1520.3 |
| 54.7                              | 414.3  | 1400.7 | 63.8              | 375.0  | 1535.7 | 67.8   | 445.8  | 1534.2 | 58.8              | 430.0  | 1546.8 |
| 66.4                              | 416.1  | 1459.9 | 95.6              | 395.9  | 1611.3 | 86.1   | 469.7  | 1593.5 | 77.6              | 457.5  | 1606.8 |
| 80.6                              | 446.0  | 1627.5 | 104.5             | 455.6  | 1640.2 | 116.3  | 510.7  | 1620.3 | 89.8              | 481.8  | 1634.7 |



|       |        |        |       |        |        |       |        |        |       |        |        |
|-------|--------|--------|-------|--------|--------|-------|--------|--------|-------|--------|--------|
| 101.4 | 471.3  | 1662.9 | 129.2 | 498.6  | 1656.4 | 118.4 | 516.6  | 1694.1 | 106.4 | 524.3  | 1657.4 |
| 119.2 | 527.4  | 1684.7 | 136.5 | 537.4  | 1710.4 | 144.8 | 555.5  | 1717.4 | 116.1 | 528.5  | 3086.3 |
| 133.3 | 567.9  | 1731.4 | 141.8 | 578.0  | 2839.3 | 147.6 | 597.5  | 2928.2 | 127.7 | 548.0  | 3144.3 |
| 142.4 | 572.4  | 2875.2 | 188.2 | 596.8  | 2968.8 | 172.1 | 625.1  | 2969.0 | 137.8 | 562.8  | 3289.1 |
| 211.4 | 635.2  | 2955.5 | 193.0 | 617.9  | 3002.3 | 187.8 | 635.3  | 2989.2 | 177.9 | 598.2  | 3383.2 |
| 226.7 | 672.5  | 3107.2 | 237.7 | 670.9  | 3024.1 | 199.3 | 664.0  | 3458.6 | 192.9 | 714.2  | 3481.4 |
| 232.4 | 873.5  | 3320.0 | 241.5 | 881.3  | 3240.4 | 212.5 | 747.4  | 3582.1 | 225.9 | 824.3  | 3581.4 |
| 241.7 | 902.6  | 3738.4 | 257.1 | 974.3  | 3741.9 | 245.8 | 845.1  | 3680.2 | 250.1 | 1015.0 | 3630.3 |
| 263.1 | 1000.3 | 3806.5 | 288.5 | 1022.5 | 3828.5 | 264.5 | 868.9  | 3736.9 | 253.1 | 1044.0 | 3703.2 |
| 299.0 | 1043.1 | 3872.9 | 297.8 | 1038.4 | 3902.8 | 290.4 | 972.1  | 3851.2 | 307.3 | 1076.8 | 3746.7 |
| 334.2 | 1116.8 | 3893.3 | 316.3 | 1089.1 | 3907.5 | 314.2 | 1109.5 | 3908.7 | 320.9 | 1205.8 | 3830.9 |
| 343.8 | 1174.0 | 3893.9 | 332.8 | 1158.0 | 3908.3 | 335.3 | 1154.1 | 3912.8 | 342.3 | 1389.1 | 3880.1 |
| 351.3 | 1233.1 | 3897.2 | 341.4 | 1269.3 | 3912.9 | 343.2 | 1271.6 | 3929.8 | 369.3 | 1399.5 | 3890.3 |

**Table S12.** Harmonic vibrational frequencies (cm<sup>-1</sup>) for the reactants, products, and intermediates of the Li(CH<sub>3</sub>OH)<sub>4</sub> + CO<sub>2</sub> + 2H<sub>2</sub> → Li(CH<sub>3</sub>OH)<sub>4</sub> + CH<sub>2</sub>(OH)<sub>2</sub> reaction pathway.

| Li(CH <sub>3</sub> OH) <sub>4</sub> |        |        | CO <sub>2</sub> r |        |        | eTS1   |        |        | CO <sub>2</sub> p |        |        |
|-------------------------------------|--------|--------|-------------------|--------|--------|--------|--------|--------|-------------------|--------|--------|
| 28.5                                | 1061.0 | 1517.5 | -29.5             | 498.7  | 1490.3 | -421.1 | 501.6  | 1505.0 | 24.9              | 493.5  | 1501.1 |
| 30.4                                | 1064.1 | 3042.2 | 13.4              | 531.7  | 1497.6 | 48.2   | 510.6  | 1509.0 | 28.0              | 526.3  | 1503.1 |
| 35.6                                | 1070.4 | 3044.2 | 24.0              | 543.4  | 1498.7 | 51.7   | 569.9  | 1509.4 | 32.3              | 727.5  | 1504.6 |
| 52.0                                | 1093.8 | 3045.3 | 30.3              | 550.8  | 1506.6 | 60.3   | 638.4  | 1516.0 | 48.3              | 799.4  | 1505.7 |
| 53.9                                | 1104.1 | 3051.4 | 34.4              | 583.6  | 1507.1 | 71.5   | 650.9  | 1516.0 | 59.2              | 839.4  | 1515.0 |
| 73.8                                | 1106.7 | 3103.8 | 39.6              | 585.8  | 1515.7 | 75.0   | 667.7  | 1525.3 | 64.1              | 910.9  | 1517.6 |
| 83.3                                | 1107.8 | 3107.4 | 42.6              | 1050.2 | 1516.4 | 92.0   | 1043.9 | 1526.2 | 75.7              | 1062.8 | 1524.9 |
| 87.0                                | 1182.3 | 3109.2 | 49.3              | 1064.0 | 1519.1 | 100.3  | 1057.7 | 1527.8 | 78.4              | 1083.7 | 1529.2 |
| 90.1                                | 1182.7 | 3114.7 | 56.2              | 1082.5 | 1521.0 | 103.0  | 1076.4 | 1528.4 | 85.8              | 1094.7 | 1536.2 |
| 93.6                                | 1183.1 | 3137.6 | 63.5              | 1087.7 | 2421.7 | 114.8  | 1083.6 | 2297.5 | 90.5              | 1096.3 | 1710.7 |
| 98.7                                | 1186.9 | 3138.3 | 69.1              | 1097.8 | 3043.0 | 123.2  | 1130.6 | 2960.8 | 98.8              | 1104.8 | 3034.1 |
| 114.9                               | 1374.9 | 3138.6 | 73.3              | 1100.7 | 3043.1 | 127.6  | 1133.2 | 2962.0 | 104.2             | 1152.2 | 3035.6 |
| 129.4                               | 1377.1 | 3163.3 | 96.0              | 1110.9 | 3046.2 | 135.0  | 1144.4 | 2962.5 | 104.5             | 1159.8 | 3042.2 |
| 138.6                               | 1380.4 | 3325.8 | 96.8              | 1120.3 | 3047.5 | 150.6  | 1151.8 | 2963.7 | 119.6             | 1162.4 | 3051.2 |
| 157.6                               | 1383.8 | 3333.0 | 104.1             | 1178.5 | 3104.5 | 154.8  | 1204.2 | 3016.7 | 126.9             | 1187.9 | 3092.2 |
| 182.8                               | 1475.2 | 3408.7 | 106.8             | 1179.4 | 3105.9 | 168.3  | 1204.4 | 3019.9 | 138.3             | 1191.1 | 3095.0 |
| 191.9                               | 1476.7 | 3876.9 | 112.2             | 1188.3 | 3107.7 | 184.6  | 1209.0 | 3021.8 | 146.2             | 1191.1 | 3104.6 |
| 242.3                               | 1476.9 |        | 128.7             | 1189.0 | 3108.7 | 220.9  | 1209.6 | 3025.5 | 168.7             | 1193.7 | 3114.0 |
| 295.9                               | 1489.5 |        | 137.0             | 1360.2 | 3139.7 | 242.7  | 1267.0 | 3042.5 | 183.8             | 1353.7 | 3117.3 |
| 447.2                               | 1498.9 |        | 152.4             | 1369.4 | 3141.8 | 255.5  | 1382.7 | 3050.5 | 190.2             | 1376.2 | 3127.6 |
| 451.3                               | 1500.1 |        | 190.4             | 1373.1 | 3147.0 | 300.5  | 1399.3 | 3058.3 | 239.5             | 1459.5 | 3128.9 |
| 463.4                               | 1500.5 |        | 216.2             | 1380.4 | 3148.6 | 302.6  | 1400.7 | 3060.7 | 241.1             | 1481.0 | 3166.1 |
| 495.9                               | 1513.3 |        | 234.4             | 1406.0 | 3236.4 | 304.1  | 1423.8 | 3061.1 | 280.8             | 1488.0 | 3223.1 |
| 525.9                               | 1516.2 |        | 322.1             | 1470.5 | 3253.9 | 305.7  | 1486.9 | 3066.0 | 297.1             | 1490.3 | 3367.3 |
| 560.6                               | 1516.4 |        | 389.0             | 1473.7 | 3752.4 | 382.1  | 1490.1 | 3644.2 | 298.5             | 1491.3 | 3444.4 |
| 1058.5                              | 1517.0 |        | 467.8             | 1489.6 | 3761.9 | 489.6  | 1504.0 | 3650.5 | 443.2             | 1493.7 | 3888.6 |
| H <sub>2</sub> r1                   |        |        | CHTS1             |        |        | CHp1   |        |        | OHTS1             |        |        |
| 21.6                                | 344.3  | 1493.2 | -1160.4           | 439.8  | 1491.4 | 25.8   | 437.9  | 1499.4 | -801.6            | 499.9  | 1489.9 |
| 23.7                                | 360.5  | 1500.4 | 23.9              | 493.5  | 1495.1 | 30.2   | 499.7  | 1502.9 | 26.3              | 569.1  | 1491.3 |
| 24.6                                | 441.5  | 1503.2 | 26.9              | 530.5  | 1503.2 | 35.7   | 527.4  | 1504.3 | 27.7              | 678.8  | 1498.8 |
| 27.9                                | 493.8  | 1504.4 | 32.6              | 730.1  | 1503.6 | 40.5   | 752.5  | 1505.2 | 39.4              | 721.4  | 1504.1 |
| 31.8                                | 526.8  | 1505.6 | 48.1              | 809.3  | 1505.4 | 50.9   | 843.0  | 1512.6 | 45.0              | 802.7  | 1505.8 |
| 48.2                                | 726.5  | 1514.9 | 58.7              | 845.7  | 1508.2 | 55.1   | 886.8  | 1515.0 | 62.8              | 865.4  | 1515.7 |
| 58.6                                | 791.8  | 1517.6 | 61.1              | 929.5  | 1515.2 | 61.9   | 988.1  | 1517.8 | 66.7              | 960.2  | 1517.4 |
| 63.8                                | 831.6  | 1524.6 | 67.3              | 1062.4 | 1517.6 | 78.4   | 1065.1 | 1528.2 | 72.9              | 1063.8 | 1519.8 |
| 75.2                                | 904.6  | 1528.3 | 77.1              | 1084.5 | 1524.8 | 82.7   | 1087.3 | 1533.1 | 81.0              | 1066.1 | 1523.2 |
| 77.5                                | 1062.5 | 1535.3 | 83.5              | 1094.7 | 1530.6 | 86.0   | 1093.4 | 1568.8 | 86.8              | 1079.2 | 1527.5 |
| 85.3                                | 1082.8 | 1713.0 | 87.9              | 1097.9 | 1544.7 | 87.2   | 1093.6 | 1657.6 | 91.0              | 1088.8 | 1740.4 |
| 89.7                                | 1094.6 | 3034.7 | 91.7              | 1105.4 | 1711.1 | 95.1   | 1095.0 | 2964.5 | 96.1              | 1093.0 | 3038.5 |
| 97.7                                | 1095.9 | 3036.6 | 98.6              | 1126.7 | 3032.1 | 97.2   | 1112.5 | 3005.6 | 99.9              | 1098.8 | 3041.0 |
| 102.6                               | 1104.0 | 3043.0 | 103.4             | 1152.3 | 3035.5 | 100.5  | 1154.8 | 3036.9 | 103.7             | 1130.2 | 3042.3 |
| 103.3                               | 1151.3 | 3051.5 | 106.3             | 1161.9 | 3041.7 | 107.2  | 1164.4 | 3037.7 | 107.9             | 1146.1 | 3049.8 |
| 118.7                               | 1159.0 | 3093.7 | 124.1             | 1164.8 | 3051.4 | 112.1  | 1172.2 | 3049.7 | 119.4             | 1152.9 | 3057.3 |
| 126.0                               | 1161.6 | 3095.6 | 134.4             | 1187.9 | 3092.3 | 121.5  | 1187.4 | 3051.5 | 125.6             | 1185.7 | 3096.7 |
| 137.0                               | 1187.8 | 3105.5 | 141.6             | 1191.1 | 3093.1 | 144.8  | 1191.6 | 3081.8 | 137.0             | 1188.1 | 3100.5 |
| 144.6                               | 1190.9 | 3114.4 | 148.1             | 1191.1 | 3103.7 | 147.1  | 1192.2 | 3096.4 | 155.0             | 1191.1 | 3106.2 |
| 164.2                               | 1190.9 | 3118.1 | 169.4             | 1193.3 | 3114.3 | 171.5  | 1192.5 | 3096.8 | 157.5             | 1191.8 | 3111.4 |
| 167.4                               | 1193.4 | 3128.5 | 180.3             | 1220.5 | 3116.0 | 184.0  | 1375.6 | 3110.2 | 172.6             | 1324.9 | 3127.4 |
| 183.6                               | 1351.4 | 3129.9 | 238.0             | 1293.6 | 3127.7 | 187.7  | 1381.0 | 3112.2 | 197.4             | 1375.8 | 3131.1 |
| 192.1                               | 1376.3 | 3166.2 | 240.6             | 1376.3 | 3128.5 | 196.2  | 1414.2 | 3122.0 | 232.1             | 1411.3 | 3133.2 |
| 236.8                               | 1458.0 | 3236.7 | 254.4             | 1430.3 | 3166.0 | 235.9  | 1483.0 | 3124.8 | 248.9             | 1421.3 | 3166.0 |
| 240.4                               | 1478.9 | 3384.7 | 295.1             | 1462.3 | 3192.1 | 247.7  | 1485.4 | 3161.9 | 275.5             | 1456.4 | 3186.2 |
| 279.4                               | 1488.0 | 3456.5 | 300.1             | 1485.7 | 3364.6 | 291.4  | 1487.9 | 3304.0 | 311.6             | 1478.5 | 3404.3 |
| 294.5                               | 1490.2 | 3888.3 | 344.3             | 1488.9 | 3441.8 | 297.4  | 1490.8 | 3386.1 | 426.3             | 1482.0 | 3549.5 |
| 297.6                               | 1491.3 | 4362.4 | 405.8             | 1490.8 | 3888.4 | 320.9  | 1492.6 | 3888.4 | 487.4             | 1489.0 | 3883.2 |
| OHp1                                |        |        | eTS2              |        |        | rFA    |        |        | H <sub>2</sub> r2 |        |        |

|        |        |        |        |        |        |         |        |        |       |        |        |
|--------|--------|--------|--------|--------|--------|---------|--------|--------|-------|--------|--------|
| 13.4   | 525.9  | 1492.6 | -352.3 | 495.1  | 1492.6 | 25.1    | 525.5  | 1501.8 | 23.1  | 410.7  | 1491.7 |
| 27.1   | 567.8  | 1498.5 | 21.4   | 511.2  | 1501.1 | 33.0    | 558.6  | 1504.2 | 27.3  | 465.9  | 1501.6 |
| 33.3   | 651.4  | 1500.0 | 28.5   | 542.5  | 1503.6 | 41.2    | 860.5  | 1504.9 | 32.7  | 469.5  | 1504.1 |
| 33.8   | 700.2  | 1507.8 | 33.6   | 638.9  | 1505.5 | 46.6    | 896.2  | 1508.1 | 40.5  | 527.2  | 1504.9 |
| 46.8   | 861.6  | 1508.0 | 38.7   | 668.8  | 1514.4 | 56.1    | 954.2  | 1516.1 | 44.6  | 559.9  | 1507.8 |
| 59.9   | 1067.0 | 1518.2 | 47.8   | 894.7  | 1516.5 | 63.5    | 971.6  | 1516.5 | 48.3  | 863.4  | 1515.9 |
| 72.6   | 1070.2 | 1518.5 | 55.8   | 1045.5 | 1518.7 | 76.6    | 1031.0 | 1517.3 | 58.5  | 895.7  | 1516.4 |
| 78.0   | 1071.8 | 1519.1 | 59.0   | 1061.1 | 1521.5 | 90.7    | 1066.1 | 1525.8 | 63.3  | 950.8  | 1517.1 |
| 82.7   | 1079.2 | 1527.7 | 74.2   | 1066.4 | 1528.3 | 91.8    | 1084.9 | 1536.0 | 77.1  | 971.3  | 1525.4 |
| 86.2   | 1090.0 | 1785.4 | 80.8   | 1075.5 | 1664.2 | 93.9    | 1094.0 | 1570.5 | 91.0  | 1020.9 | 1535.6 |
| 92.3   | 1094.1 | 2912.6 | 85.8   | 1093.8 | 3034.5 | 95.9    | 1108.8 | 2909.1 | 93.0  | 1065.7 | 1566.6 |
| 100.0  | 1109.1 | 3042.2 | 91.9   | 1094.4 | 3041.1 | 105.3   | 1117.0 | 2970.4 | 93.7  | 1084.4 | 2935.4 |
| 102.3  | 1121.8 | 3042.9 | 96.8   | 1111.3 | 3050.8 | 111.3   | 1140.1 | 3017.8 | 96.1  | 1094.0 | 2975.5 |
| 106.0  | 1148.1 | 3044.1 | 107.8  | 1120.2 | 3051.8 | 114.0   | 1167.5 | 3030.3 | 103.8 | 1107.8 | 3021.8 |
| 118.1  | 1183.7 | 3046.6 | 109.7  | 1156.9 | 3094.9 | 131.1   | 1169.7 | 3037.3 | 110.8 | 1115.9 | 3033.2 |
| 123.8  | 1184.1 | 3073.6 | 119.4  | 1182.6 | 3101.3 | 132.8   | 1182.3 | 3048.3 | 116.8 | 1141.0 | 3038.0 |
| 128.8  | 1185.1 | 3103.5 | 131.9  | 1188.0 | 3112.8 | 147.7   | 1188.5 | 3076.2 | 130.9 | 1166.7 | 3049.0 |
| 153.4  | 1189.2 | 3104.3 | 137.8  | 1190.5 | 3118.5 | 164.8   | 1191.4 | 3078.4 | 133.1 | 1170.2 | 3079.0 |
| 161.7  | 1191.2 | 3105.9 | 142.8  | 1192.2 | 3120.8 | 182.9   | 1193.5 | 3081.8 | 147.9 | 1181.5 | 3081.5 |
| 177.2  | 1286.1 | 3106.5 | 160.0  | 1270.7 | 3131.2 | 189.7   | 1194.7 | 3099.9 | 164.8 | 1188.5 | 3098.4 |
| 193.1  | 1353.7 | 3129.5 | 172.6  | 1373.7 | 3138.2 | 234.6   | 1316.4 | 3107.5 | 181.2 | 1191.3 | 3101.1 |
| 206.2  | 1387.4 | 3138.3 | 190.9  | 1375.6 | 3140.7 | 265.7   | 1375.4 | 3109.6 | 188.1 | 1193.2 | 3109.5 |
| 234.6  | 1397.4 | 3140.4 | 211.7  | 1388.6 | 3165.6 | 277.1   | 1440.2 | 3111.1 | 190.3 | 1194.5 | 3110.6 |
| 263.0  | 1415.7 | 3154.4 | 247.3  | 1399.1 | 3266.5 | 313.1   | 1479.0 | 3124.1 | 234.9 | 1319.6 | 3115.5 |
| 391.3  | 1472.2 | 3229.6 | 320.9  | 1477.5 | 3310.9 | 343.2   | 1483.6 | 3163.9 | 264.4 | 1375.6 | 3125.3 |
| 425.2  | 1478.4 | 3354.2 | 330.5  | 1480.9 | 3434.0 | 364.2   | 1488.9 | 3389.3 | 274.2 | 1437.9 | 3164.5 |
| 478.4  | 1480.5 | 3461.9 | 457.5  | 1485.9 | 3699.2 | 465.5   | 1489.9 | 3857.7 | 313.2 | 1478.3 | 3397.2 |
| 512.8  | 1487.9 | 3843.0 | 490.5  | 1489.6 | 3875.2 | 469.5   | 1491.8 | 3884.9 | 339.7 | 1483.2 | 3857.1 |
|        |        |        |        |        |        |         |        |        | 367.2 | 1488.8 | 3884.7 |
|        |        |        |        |        |        |         |        |        | 382.2 | 1489.7 | 4335.2 |
| CHTS2  |        |        | CHp2   |        |        | OHTS2   |        |        | OHP2  |        |        |
| -949.9 | 483.1  | 1505.0 | 20.8   | 487.7  | 1503.1 | -1220.6 | 518.8  | 1506.8 | 21.8  | 578.0  | 1492.9 |
| 61.6   | 604.2  | 1507.9 | 26.9   | 508.8  | 1503.9 | 51.3    | 573.7  | 1512.9 | 35.8  | 589.6  | 1496.3 |
| 74.4   | 720.8  | 1509.1 | 35.2   | 535.6  | 1506.4 | 60.4    | 770.7  | 1513.7 | 37.7  | 823.5  | 1504.2 |
| 83.2   | 883.4  | 1513.0 | 49.1   | 832.8  | 1513.3 | 70.7    | 879.4  | 1514.3 | 44.7  | 837.3  | 1506.2 |
| 93.6   | 933.2  | 1517.2 | 59.1   | 875.1  | 1515.9 | 82.7    | 925.8  | 1516.7 | 56.9  | 1019.1 | 1515.3 |
| 103.5  | 975.8  | 1518.3 | 63.5   | 1027.3 | 1517.6 | 88.0    | 970.4  | 1520.8 | 61.3  | 1034.9 | 1516.6 |
| 110.8  | 1016.2 | 1520.6 | 66.6   | 1063.2 | 1519.5 | 89.8    | 985.2  | 1523.8 | 67.1  | 1062.4 | 1517.9 |
| 119.5  | 1034.2 | 1528.4 | 75.1   | 1092.7 | 1524.8 | 107.8   | 1051.6 | 1526.8 | 71.6  | 1070.8 | 1518.5 |
| 129.1  | 1042.4 | 1532.8 | 78.8   | 1093.7 | 1547.4 | 115.3   | 1076.8 | 1532.8 | 75.5  | 1082.8 | 1525.9 |
| 142.7  | 1049.3 | 1537.2 | 85.8   | 1104.1 | 1566.5 | 119.1   | 1081.9 | 1537.2 | 85.5  | 1085.5 | 1528.7 |
| 148.0  | 1059.8 | 1550.6 | 89.6   | 1110.5 | 1610.9 | 145.9   | 1089.2 | 1548.4 | 88.5  | 1093.2 | 3037.7 |
| 157.6  | 1129.6 | 1625.7 | 96.8   | 1115.4 | 2536.3 | 151.7   | 1098.0 | 2921.8 | 94.4  | 1093.9 | 3038.6 |
| 177.4  | 1143.0 | 2828.9 | 99.1   | 1129.1 | 2798.3 | 164.3   | 1123.2 | 2944.2 | 97.3  | 1113.1 | 3041.4 |
| 178.7  | 1160.0 | 2863.6 | 102.5  | 1156.8 | 2932.5 | 168.3   | 1129.0 | 2946.1 | 98.7  | 1151.6 | 3050.2 |
| 195.8  | 1180.5 | 2936.9 | 110.5  | 1173.2 | 2940.5 | 179.8   | 1176.2 | 2952.7 | 116.3 | 1153.2 | 3068.7 |
| 210.6  | 1193.3 | 2943.4 | 118.3  | 1176.5 | 3019.1 | 198.5   | 1179.4 | 2967.6 | 120.8 | 1180.8 | 3098.0 |
| 224.2  | 1209.9 | 2944.9 | 135.4  | 1188.7 | 3025.5 | 203.6   | 1189.9 | 2990.5 | 130.1 | 1187.6 | 3099.0 |
| 240.1  | 1211.5 | 2951.7 | 139.6  | 1189.9 | 3031.5 | 251.7   | 1208.2 | 2998.2 | 140.0 | 1189.7 | 3103.5 |
| 260.7  | 1212.5 | 2993.1 | 145.0  | 1192.6 | 3047.6 | 261.4   | 1209.7 | 3005.0 | 177.9 | 1190.2 | 3112.0 |
| 283.6  | 1213.2 | 2994.7 | 150.0  | 1195.3 | 3065.1 | 267.1   | 1210.8 | 3008.6 | 183.1 | 1225.3 | 3126.2 |
| 316.7  | 1216.9 | 2999.3 | 168.1  | 1211.9 | 3074.4 | 291.5   | 1211.1 | 3026.6 | 192.0 | 1375.6 | 3128.1 |
| 318.0  | 1240.6 | 3012.2 | 183.4  | 1282.2 | 3089.3 | 293.8   | 1279.4 | 3030.4 | 231.2 | 1391.7 | 3134.5 |
| 334.0  | 1287.3 | 3012.4 | 207.5  | 1309.7 | 3095.7 | 295.2   | 1392.4 | 3037.3 | 261.3 | 1403.3 | 3150.2 |
| 337.6  | 1335.6 | 3018.5 | 219.9  | 1374.7 | 3101.8 | 297.8   | 1394.9 | 3038.9 | 271.2 | 1423.7 | 3164.8 |
| 338.4  | 1399.0 | 3026.8 | 245.4  | 1437.5 | 3109.1 | 301.5   | 1446.7 | 3061.0 | 302.9 | 1437.3 | 3233.2 |
| 346.1  | 1414.9 | 3042.6 | 256.2  | 1478.6 | 3118.2 | 347.6   | 1477.5 | 3076.9 | 420.6 | 1472.5 | 3254.9 |
| 370.0  | 1441.8 | 3109.7 | 290.9  | 1483.0 | 3165.9 | 415.6   | 1500.0 | 3234.7 | 466.9 | 1478.5 | 3403.2 |
| 390.2  | 1492.2 | 3277.5 | 304.6  | 1487.1 | 3405.7 | 447.8   | 1500.8 | 3317.7 | 472.6 | 1487.4 | 3438.5 |
| 437.6  | 1498.2 | 3643.1 | 371.7  | 1489.3 | 3849.9 | 479.1   | 1504.0 | 3724.4 | 496.2 | 1489.5 | 3487.2 |
| 470.9  | 1500.6 | 3727.9 | 462.7  | 1489.8 | 3891.3 | 488.3   | 1505.0 | 3809.4 | 503.7 | 1491.1 | 3882.3 |

**Table S13.** Harmonic vibrational frequencies (cm<sup>-1</sup>) for the reactants, products, and intermediates of the Li(NH<sub>3</sub>)<sub>4</sub> + 2 C<sub>2</sub>H<sub>4</sub> → Li(NH<sub>3</sub>)<sub>4</sub> + C<sub>5</sub>H<sub>8</sub>O<sub>2</sub> reaction pathway.

| Li(NH <sub>3</sub> ) <sub>4</sub> |        |        | CO <sub>2</sub> r |        |        | eTS    |        |        | CO <sub>2</sub> p |        |        |
|-----------------------------------|--------|--------|-------------------|--------|--------|--------|--------|--------|-------------------|--------|--------|
| 58.2                              | 324.3  | 1646.1 | 15.4              | 329.1  | 1643.2 | -796.2 | 323.4  | 1651.3 | 11.7              | 350.3  | 1665.6 |
| 64.5                              | 407.3  | 1646.1 | 22.2              | 342.9  | 1647.2 | 19.7   | 329.6  | 1653.0 | 30.4              | 377.0  | 1666.0 |
| 64.8                              | 407.4  | 1646.1 | 38.4              | 346.6  | 1647.6 | 39.7   | 345.8  | 1657.2 | 41.9              | 397.0  | 1691.7 |
| 65.0                              | 503.6  | 3407.9 | 51.5              | 413.6  | 1653.5 | 51.3   | 351.8  | 1658.7 | 63.4              | 423.5  | 1701.7 |
| 74.4                              | 503.8  | 3408.0 | 53.5              | 423.3  | 1655.0 | 58.8   | 383.7  | 1658.7 | 69.2              | 500.1  | 1705.1 |
| 74.5                              | 504.2  | 3408.0 | 64.5              | 499.6  | 2428.3 | 69.0   | 418.5  | 2270.2 | 107.1             | 556.7  | 1723.5 |
| 76.2                              | 1147.8 | 3425.9 | 75.4              | 502.0  | 3390.9 | 82.6   | 450.5  | 3407.5 | 113.8             | 564.1  | 3212.3 |
| 76.4                              | 1147.8 | 3527.4 | 79.7              | 513.1  | 3404.3 | 84.7   | 513.0  | 3413.3 | 122.9             | 575.8  | 3270.2 |
| 76.5                              | 1147.8 | 3527.4 | 85.9              | 638.3  | 3421.4 | 88.8   | 526.5  | 3421.9 | 141.3             | 645.4  | 3307.1 |
| 239.0                             | 1159.1 | 3527.4 | 86.0              | 641.9  | 3430.1 | 92.3   | 565.1  | 3448.1 | 184.8             | 747.5  | 3501.7 |
| 315.2                             | 1638.5 | 3530.4 | 88.6              | 1153.1 | 3505.1 | 116.4  | 1142.9 | 3507.2 | 225.0             | 1130.0 | 3539.1 |
| 315.3                             | 1638.5 | 3530.4 | 95.1              | 1156.2 | 3513.5 | 117.7  | 1159.3 | 3519.8 | 228.8             | 1213.2 | 3543.1 |
| 315.6                             | 1644.3 | 3534.8 | 105.9             | 1161.1 | 3514.8 | 127.4  | 1168.0 | 3522.7 | 237.0             | 1233.5 | 3544.5 |
| 324.1                             | 1644.3 | 3534.8 | 127.1             | 1168.5 | 3529.1 | 136.6  | 1184.0 | 3544.0 | 249.8             | 1250.9 | 3601.1 |
| 324.2                             | 1644.3 | 3534.9 | 237.6             | 1389.8 | 3530.7 | 157.0  | 1217.4 | 3546.4 | 255.8             | 1346.3 | 3605.2 |
|                                   |        |        | 317.2             | 1636.4 | 3532.3 | 209.2  | 1643.3 | 3549.7 | 265.7             | 1649.3 | 3605.8 |
|                                   |        |        | 320.8             | 1636.6 | 3553.3 | 238.7  | 1645.1 | 3564.7 | 316.8             | 1653.8 | 3612.9 |
|                                   |        |        | 326.1             | 1643.1 | 3554.2 | 315.9  | 1649.4 | 3565.6 | 321.7             | 1665.4 | 3613.3 |
| EtR                               |        |        | EtTS1             |        |        | EtP    |        |        | EtR2              |        |        |
| 18.9                              | 555.1  | 3210.3 | -340.1            | 529.0  | 3212.8 | 8.6    | 577.8  | 3538.8 | 14.1              | 433.0  | 1637.9 |
| 25.6                              | 565.1  | 3230.5 | 10.9              | 566.0  | 3246.3 | 16.5   | 586.5  | 3544.4 | 17.0              | 454.8  | 1649.0 |
| 32.6                              | 583.8  | 3235.8 | 34.1              | 578.0  | 3319.1 | 22.4   | 595.5  | 3545.3 | 23.6              | 520.6  | 1660.3 |
| 39.3                              | 646.7  | 3284.6 | 37.7              | 631.3  | 3326.7 | 40.7   | 644.2  | 3601.5 | 26.1              | 525.2  | 1665.2 |
| 47.2                              | 748.2  | 3337.3 | 45.5              | 722.7  | 3368.8 | 44.2   | 675.3  | 3608.1 | 29.6              | 569.1  | 1665.7 |
| 53.8                              | 855.2  | 3501.7 | 51.1              | 797.6  | 3501.4 | 54.3   | 879.6  | 3608.2 | 42.2              | 573.3  | 1670.1 |
| 58.8                              | 998.9  | 3532.9 | 70.4              | 825.4  | 3539.5 | 69.5   | 931.5  | 3615.0 | 45.0              | 583.4  | 1697.2 |
| 71.3                              | 1038.0 | 3539.6 | 71.2              | 919.8  | 3546.6 | 108.4  | 1015.0 | 3615.1 | 49.0              | 595.1  | 1712.7 |
| 74.5                              | 1094.8 | 3545.2 | 112.8             | 1003.6 | 3547.6 | 111.7  | 1123.8 | 3132.0 | 55.6              | 643.4  | 1714.0 |
| 99.8                              | 1129.9 | 3598.8 | 115.3             | 1131.2 | 3604.8 | 121.2  | 1124.1 | 3167.1 | 57.9              | 673.8  | 1721.1 |
| 108.5                             | 1211.2 | 3602.0 | 120.3             | 1215.6 | 3605.6 | 166.8  | 1188.1 | 3185.2 | 71.6              | 855.1  | 3004.1 |
| 122.8                             | 1229.7 | 3605.7 | 135.6             | 1221.0 | 3606.3 | 175.1  | 1217.3 | 3234.2 | 95.8              | 880.9  | 3013.4 |
| 124.1                             | 1247.3 | 3612.5 | 165.9             | 1242.2 | 3612.4 | 199.8  | 1244.6 | 3277.9 | 110.8             | 932.1  | 3130.3 |
| 136.2                             | 1262.3 | 3613.7 | 191.9             | 1250.1 | 3612.9 | 231.2  | 1267.2 | 3502.7 | 116.9             | 993.0  | 3148.8 |
| 169.7                             | 1351.1 |        | 206.6             | 1289.4 |        | 246.6  | 1328.5 |        | 122.1             | 1015.4 | 3156.4 |
| 177.3                             | 1394.8 |        | 213.9             | 1326.1 |        | 252.0  | 1434.6 |        | 167.4             | 1042.3 | 3168.0 |
| 219.1                             | 1491.0 |        | 216.1             | 1467.9 |        | 279.7  | 1443.8 |        | 173.4             | 1100.2 | 3207.9 |
| 231.1                             | 1652.9 |        | 224.0             | 1578.7 |        | 284.2  | 1456.9 |        | 179.3             | 1123.8 | 3222.9 |
| 240.5                             | 1655.0 |        | 234.9             | 1642.1 |        | 317.0  | 1638.3 |        | 191.4             | 1124.2 | 3233.1 |
| 246.7                             | 1665.7 |        | 249.4             | 1650.6 |        | 320.4  | 1649.2 |        | 227.2             | 1189.7 | 3267.2 |
| 265.2                             | 1665.9 |        | 314.7             | 1660.7 |        | 322.2  | 1660.7 |        | 244.9             | 1216.3 | 3278.7 |
| 265.9                             | 1666.8 |        | 319.0             | 1666.0 |        | 359.4  | 1665.1 |        | 251.4             | 1242.0 | 3502.6 |
| 318.3                             | 1691.8 |        | 355.7             | 1666.2 |        | 383.2  | 1665.5 |        | 276.1             | 1261.3 | 3539.8 |
| 322.2                             | 1700.9 |        | 380.0             | 1686.2 |        | 398.1  | 1670.8 |        | 284.1             | 1262.6 | 3542.1 |
| 355.1                             | 1705.1 |        | 407.4             | 1696.3 |        | 433.1  | 1698.9 |        | 317.8             | 1328.4 | 3545.9 |
| 380.9                             | 1710.5 |        | 414.4             | 1703.6 |        | 454.0  | 1714.5 |        | 318.7             | 1394.8 | 3602.3 |
| 408.5                             | 1720.5 |        | 427.0             | 1770.7 |        | 519.5  | 1722.8 |        | 322.6             | 1435.4 | 3606.0 |
| 429.4                             | 3132.0 |        | 476.4             | 3140.7 |        | 526.4  | 3004.4 |        | 361.4             | 1444.1 | 3609.4 |
| 500.7                             | 3150.3 |        | 492.2             | 3158.0 |        | 565.4  | 3013.0 |        | 390.7             | 1455.8 | 3614.3 |
|                                   |        |        |                   |        |        |        |        |        | 401.1             | 1492.4 | 3615.3 |
| EtTS2                             |        |        | EtP2              |        |        | LacTS  |        |        | LacP              |        |        |
| -461.7                            | 518.2  | 1593.1 | 11.5              | 520.1  | 1670.1 | -981.3 | 557.9  | 1494.9 | 11.2              | 513.2  | 1532.2 |
| 11.6                              | 523.0  | 1634.1 | 15.6              | 539.9  | 1699.0 | 14.0   | 563.7  | 1506.0 | 20.3              | 530.8  | 1636.1 |
| 19.1                              | 565.6  | 1649.7 | 22.4              | 566.6  | 1715.5 | 21.1   | 585.2  | 1645.5 | 35.4              | 572.7  | 1639.4 |
| 21.0                              | 570.2  | 1660.0 | 34.6              | 578.9  | 1722.5 | 24.6   | 609.1  | 1654.9 | 39.8              | 587.9  | 1644.8 |
| 34.6                              | 579.3  | 1665.4 | 36.4              | 588.7  | 1507.9 | 37.8   | 649.4  | 1664.5 | 51.4              | 719.6  | 1646.3 |
| 43.9                              | 583.7  | 1665.7 | 47.6              | 601.5  | 1630.0 | 49.3   | 668.0  | 1665.4 | 71.2              | 773.7  | 1651.1 |

|                               |        |        |           |        |        |       |        |        |       |        |        |
|-------------------------------|--------|--------|-----------|--------|--------|-------|--------|--------|-------|--------|--------|
| 50.4                          | 594.0  | 1670.9 | 65.0      | 662.5  | 1649.0 | 54.8  | 749.5  | 1666.6 | 74.0  | 821.5  | 1654.7 |
| 65.4                          | 656.6  | 1698.2 | 73.5      | 710.4  | 1659.2 | 68.1  | 814.7  | 1701.4 | 79.4  | 889.2  | 1659.5 |
| 68.4                          | 680.2  | 1715.1 | 91.1      | 738.0  | 1665.0 | 104.1 | 847.0  | 1711.3 | 84.7  | 953.0  | 1681.3 |
| 87.2                          | 783.0  | 1721.3 | 107.2     | 851.1  | 1665.4 | 109.7 | 864.4  | 1723.9 | 96.2  | 975.2  | 1817.9 |
| 109.5                         | 833.6  | 2993.5 | 108.7     | 905.2  | 2951.5 | 111.6 | 968.3  | 3015.2 | 102.4 | 992.8  | 3057.1 |
| 112.5                         | 864.8  | 3063.6 | 115.4     | 941.3  | 3009.3 | 139.2 | 979.8  | 3027.6 | 110.3 | 1103.2 | 3065.1 |
| 120.1                         | 881.0  | 3142.9 | 129.8     | 1050.7 | 3046.7 | 170.9 | 996.9  | 3039.3 | 136.5 | 1117.5 | 3068.9 |
| 162.5                         | 911.7  | 3145.9 | 138.4     | 1078.7 | 3062.8 | 221.7 | 1035.9 | 3050.9 | 140.2 | 1127.8 | 3081.3 |
| 171.2                         | 1001.3 | 3151.1 | 197.3     | 1100.2 | 3069.8 | 230.0 | 1089.7 | 3065.2 | 143.1 | 1129.6 | 3102.7 |
| 196.7                         | 1032.7 | 3155.1 | 201.4     | 1123.4 | 3099.6 | 243.3 | 1104.1 | 3080.2 | 152.8 | 1138.8 | 3121.4 |
| 219.5                         | 1036.8 | 3199.6 | 218.6     | 1135.6 | 3123.6 | 255.2 | 1119.7 | 3087.8 | 189.7 | 1147.8 | 3140.5 |
| 240.2                         | 1123.5 | 3221.5 | 242.7     | 1163.9 | 3156.6 | 278.0 | 1211.8 | 3119.8 | 242.4 | 1158.1 | 3148.7 |
| 249.0                         | 1125.9 | 3245.8 | 252.5     | 1217.2 | 3180.4 | 281.0 | 1223.6 | 3127.2 | 302.6 | 1186.6 | 3397.9 |
| 255.9                         | 1213.6 | 3246.9 | 282.4     | 1245.1 | 3229.7 | 299.6 | 1233.2 | 3193.5 | 316.3 | 1233.2 | 3407.6 |
| 277.8                         | 1216.8 | 3249.5 | 286.6     | 1265.9 | 3253.0 | 315.7 | 1237.2 | 3250.5 | 333.3 | 1280.6 | 3424.6 |
| 284.7                         | 1242.4 | 3502.5 | 317.0     | 1269.3 | 3502.7 | 319.6 | 1249.3 | 3503.1 | 335.3 | 1300.2 | 3453.0 |
| 315.3                         | 1252.1 | 3538.5 | 321.9     | 1289.4 | 3538.4 | 360.7 | 1262.0 | 3539.1 | 337.9 | 1303.7 | 3502.4 |
| 317.8                         | 1265.8 | 3544.9 | 333.4     | 1326.8 | 3544.5 | 383.5 | 1289.1 | 3542.5 | 370.2 | 1357.6 | 3513.5 |
| 322.8                         | 1307.4 | 3545.8 | 360.7     | 1354.9 | 3545.3 | 395.5 | 1343.1 | 3543.9 | 389.2 | 1393.6 | 3530.5 |
| 359.0                         | 1333.5 | 3601.0 | 372.0     | 1411.0 | 3601.2 | 419.2 | 1369.5 | 3600.8 | 434.8 | 1398.7 | 3538.4 |
| 383.1                         | 1437.6 | 3608.0 | 384.5     | 1453.1 | 3608.2 | 423.4 | 1385.3 | 3607.6 | 443.9 | 1431.7 | 3542.1 |
| 384.2                         | 1456.1 | 3608.4 | 398.4     | 1470.9 | 3608.5 | 447.1 | 1467.3 | 3607.9 | 449.5 | 1486.5 | 3558.1 |
| 397.6                         | 1461.7 | 3614.3 | 433.4     | 1473.3 | 3615.1 | 488.1 | 1479.2 | 3615.1 | 461.1 | 1495.4 | 3565.0 |
| 433.1                         | 1482.0 | 3614.6 | 480.1     | 1475.9 | 3615.1 | 533.8 | 1489.4 | 3616.8 | 508.0 | 1521.4 | 3600.3 |
| C <sub>2</sub> H <sub>4</sub> |        |        | δ-lactone |        |        |       |        |        |       |        |        |
| 842.0                         |        |        | 96.4      | 1007.7 | 1474.5 |       |        |        |       |        |        |
| 991.8                         |        |        | 147.1     | 1082.2 | 1496.6 |       |        |        |       |        |        |
| 1010.2                        |        |        | 324.8     | 1132.0 | 1512.7 |       |        |        |       |        |        |
| 1072.4                        |        |        | 420.0     | 1138.1 | 1531.2 |       |        |        |       |        |        |
| 1254.7                        |        |        | 463.8     | 1192.9 | 1850.9 |       |        |        |       |        |        |
| 1391.0                        |        |        | 510.2     | 1218.3 | 3047.5 |       |        |        |       |        |        |
| 1483.9                        |        |        | 571.9     | 1282.8 | 3048.9 |       |        |        |       |        |        |
| 1719.2                        |        |        | 668.6     | 1296.1 | 3056.2 |       |        |        |       |        |        |
| 3147.1                        |        |        | 768.4     | 1317.8 | 3060.8 |       |        |        |       |        |        |
| 3163.9                        |        |        | 844.1     | 1377.4 | 3100.0 |       |        |        |       |        |        |
| 3219.5                        |        |        | 897.4     | 1390.8 | 3103.1 |       |        |        |       |        |        |
| 3245.9                        |        |        | 949.8     | 1404.6 | 3125.5 |       |        |        |       |        |        |
|                               |        |        | 957.0     | 1443.5 | 3131.7 |       |        |        |       |        |        |

**Table S14.** Harmonic vibrational frequencies ( $\text{cm}^{-1}$ ) for the reactants, products, and intermediates of the  $\text{Li}(\text{NH}_2\text{CH}_3)_4 + 2 \text{C}_2\text{H}_4 \rightarrow \text{Li}(\text{NH}_2\text{CH}_3)_4 + \text{C}_5\text{H}_8\text{O}_2$  reaction pathway.

| Li(NH <sub>2</sub> CH <sub>3</sub> ) <sub>4</sub> |        |        | CO <sub>2</sub> r |        |        | eTS    |        |        | CO <sub>2</sub> p |        |        |
|---------------------------------------------------|--------|--------|-------------------|--------|--------|--------|--------|--------|-------------------|--------|--------|
| 31.6                                              | 993.0  | 1651.7 | 14.6              | 554.9  | 1511.7 | -382.4 | 507.8  | 1511.2 | 18.5              | 603.8  | 1513.1 |
| 32.0                                              | 997.9  | 3038.8 | 23.8              | 581.9  | 1522.2 | 19.8   | 536.7  | 1522.5 | 23.5              | 745.3  | 1523.6 |
| 33.4                                              | 1001.9 | 3039.1 | 25.6              | 958.1  | 1523.8 | 26.3   | 948.6  | 1524.9 | 41.1              | 934.7  | 1528.4 |
| 34.3                                              | 1058.2 | 3041.3 | 31.9              | 964.4  | 1526.6 | 31.6   | 971.4  | 1526.4 | 49.9              | 984.7  | 1529.5 |
| 45.3                                              | 1060.4 | 3041.9 | 33.8              | 969.3  | 1527.8 | 33.3   | 975.3  | 1528.5 | 51.8              | 987.2  | 1531.2 |
| 56.9                                              | 1062.5 | 3099.9 | 37.4              | 989.8  | 1617.5 | 39.0   | 989.2  | 1621.3 | 69.3              | 996.7  | 1663.5 |
| 65.3                                              | 1063.5 | 3100.1 | 40.4              | 993.5  | 1640.4 | 51.9   | 996.4  | 1641.2 | 77.3              | 999.1  | 1680.1 |
| 75.5                                              | 1207.5 | 3105.7 | 48.4              | 998.2  | 1650.3 | 54.0   | 997.9  | 1656.4 | 79.7              | 1045.3 | 1695.7 |
| 75.7                                              | 1207.7 | 3106.5 | 53.9              | 998.7  | 1662.7 | 55.6   | 1005.2 | 1667.7 | 86.7              | 1058.0 | 1697.5 |
| 97.1                                              | 1215.4 | 3123.7 | 65.1              | 1004.9 | 2423.6 | 59.8   | 1013.2 | 2353.3 | 101.8             | 1065.8 | 1711.6 |
| 129.2                                             | 1218.4 | 3124.1 | 68.8              | 1057.6 | 3038.1 | 65.4   | 1058.5 | 3040.4 | 103.5             | 1067.8 | 3032.8 |
| 135.0                                             | 1351.5 | 3132.5 | 73.4              | 1060.0 | 3040.5 | 70.9   | 1060.8 | 3040.8 | 110.6             | 1072.8 | 3034.6 |
| 135.1                                             | 1352.7 | 3133.0 | 82.9              | 1063.3 | 3041.2 | 81.4   | 1064.6 | 3041.2 | 133.3             | 1081.4 | 3035.9 |
| 166.0                                             | 1353.9 | 3381.4 | 97.2              | 1066.5 | 3042.5 | 95.8   | 1068.2 | 3042.5 | 138.2             | 1089.0 | 3040.1 |
| 168.7                                             | 1355.4 | 3389.4 | 111.0             | 1207.4 | 3099.1 | 98.5   | 1203.9 | 3099.8 | 140.5             | 1199.8 | 3083.7 |
| 181.6                                             | 1457.8 | 3430.2 | 114.6             | 1210.3 | 3102.5 | 125.4  | 1212.9 | 3100.3 | 155.2             | 1228.6 | 3086.5 |
| 208.4                                             | 1458.2 | 3448.2 | 133.2             | 1216.1 | 3103.4 | 130.5  | 1218.9 | 3102.0 | 164.9             | 1235.6 | 3087.7 |
| 233.6                                             | 1465.2 | 3450.8 | 147.8             | 1220.0 | 3107.0 | 137.5  | 1223.0 | 3108.1 | 170.5             | 1241.0 | 3108.5 |
| 355.5                                             | 1467.9 | 3456.6 | 160.9             | 1352.4 | 3121.8 | 146.2  | 1297.5 | 3123.1 | 177.4             | 1349.0 | 3122.3 |
| 374.7                                             | 1504.4 | 3536.2 | 179.4             | 1353.0 | 3129.9 | 166.8  | 1352.6 | 3130.1 | 197.7             | 1353.0 | 3128.0 |
| 402.5                                             | 1504.5 | 3536.4 | 187.5             | 1354.0 | 3130.9 | 173.7  | 1354.3 | 3132.9 | 215.3             | 1376.7 | 3135.7 |
| 437.4                                             | 1507.6 |        | 199.6             | 1358.7 | 3133.8 | 186.7  | 1356.4 | 3135.5 | 229.7             | 1380.9 | 3136.9 |
| 475.6                                             | 1509.4 |        | 239.9             | 1379.8 | 3375.5 | 210.5  | 1362.4 | 3337.8 | 238.0             | 1397.0 | 3284.9 |
| 491.3                                             | 1521.9 |        | 372.4             | 1457.7 | 3394.1 | 236.0  | 1458.1 | 3377.6 | 248.4             | 1467.2 | 3311.5 |
| 496.2                                             | 1522.1 |        | 392.6             | 1460.9 | 3430.2 | 366.6  | 1461.8 | 3449.6 | 374.0             | 1468.3 | 3343.4 |
| 956.9                                             | 1524.2 |        | 399.3             | 1466.0 | 3452.6 | 373.2  | 1467.4 | 3483.0 | 405.7             | 1469.0 | 3523.9 |
| 959.9                                             | 1526.5 |        | 441.0             | 1468.9 | 3460.6 | 394.7  | 1470.7 | 3488.4 | 456.8             | 1471.7 | 3551.4 |
| 964.3                                             | 1618.2 |        | 463.9             | 1504.1 | 3495.9 | 420.3  | 1504.0 | 3493.9 | 507.8             | 1508.6 | 3553.7 |
| 990.9                                             | 1638.3 |        | 497.4             | 1504.5 | 3540.4 | 442.4  | 1507.2 | 3561.1 | 521.0             | 1509.6 | 3554.7 |
| 991.2                                             | 1645.6 |        | 514.5             | 1507.8 | 3559.6 | 491.1  | 1508.5 | 3561.7 | 543.4             | 1512.0 | 3592.0 |
| EtR                                               |        |        | EtTS1             |        |        | EtP    |        |        | EtR2              |        |        |
| 18.1                                              | 990.4  | 3040.4 | -351.7            | 984.2  | 3034.2 | 12.8   | 988.0  | 2988.1 | 14.1              | 614.4  | 1507.0 |
| 24.6                                              | 998.9  | 3081.1 | 13.0              | 987.0  | 3035.0 | 16.4   | 999.1  | 3028.7 | 17.8              | 657.9  | 1508.7 |
| 27.1                                              | 1007.1 | 3086.6 | 18.9              | 998.0  | 3040.2 | 23.2   | 1001.7 | 3029.3 | 18.3              | 852.6  | 1512.1 |
| 30.5                                              | 1040.5 | 3091.3 | 31.8              | 1000.5 | 3041.1 | 35.9   | 1016.3 | 3030.8 | 22.3              | 876.8  | 1513.8 |
| 39.6                                              | 1043.2 | 3109.3 | 33.6              | 1010.5 | 3085.1 | 44.2   | 1056.7 | 3031.1 | 26.4              | 931.7  | 1523.1 |
| 43.8                                              | 1057.5 | 3117.7 | 40.3              | 1042.5 | 3087.9 | 48.0   | 1065.7 | 3038.5 | 36.1              | 933.2  | 1527.8 |
| 49.4                                              | 1065.6 | 3129.6 | 45.1              | 1057.3 | 3092.1 | 55.0   | 1067.4 | 3078.0 | 43.1              | 986.1  | 1530.1 |
| 53.9                                              | 1067.8 | 3134.5 | 56.1              | 1063.9 | 3110.9 | 64.5   | 1073.2 | 3079.6 | 45.1              | 987.9  | 1531.4 |
| 56.5                                              | 1072.6 | 3135.7 | 72.5              | 1066.6 | 3125.0 | 70.1   | 1079.0 | 3083.6 | 47.4              | 992.3  | 1640.3 |
| 70.7                                              | 1081.5 | 3137.7 | 76.7              | 1071.0 | 3130.2 | 87.7   | 1089.7 | 3108.1 | 49.7              | 1000.6 | 1663.4 |
| 74.9                                              | 1087.2 | 3150.9 | 81.9              | 1081.2 | 3136.6 | 97.8   | 1102.2 | 3117.8 | 55.7              | 1007.6 | 1688.6 |
| 79.2                                              | 1092.4 | 3210.5 | 87.6              | 1088.5 | 3139.5 | 101.2  | 1124.2 | 3121.8 | 67.0              | 1017.8 | 1709.2 |
| 86.4                                              | 1200.4 | 3236.1 | 95.7              | 1201.2 | 3146.0 | 105.3  | 1188.4 | 3135.7 | 71.7              | 1039.5 | 1711.9 |
| 91.8                                              | 1228.4 | 3298.9 | 99.1              | 1228.4 | 3157.1 | 109.7  | 1199.0 | 3137.1 | 86.3              | 1054.7 | 1713.8 |
| 100.9                                             | 1239.8 | 3317.2 | 111.3             | 1239.2 | 3219.0 | 133.3  | 1232.2 | 3167.3 | 88.6              | 1065.4 | 2976.8 |
| 104.9                                             | 1246.8 | 3352.2 | 123.0             | 1240.2 | 3246.0 | 137.5  | 1246.1 | 3204.9 | 97.9              | 1066.8 | 3027.9 |
| 112.6                                             | 1259.1 | 3523.9 | 135.7             | 1251.0 | 3292.0 | 142.4  | 1248.9 | 3239.1 | 102.1             | 1073.4 | 3029.7 |
| 131.1                                             | 1350.2 | 3547.3 | 138.6             | 1295.6 | 3308.6 | 162.4  | 1328.9 | 3277.6 | 105.8             | 1078.1 | 3030.7 |
| 135.1                                             | 1352.9 | 3551.4 | 155.0             | 1325.6 | 3371.2 | 163.7  | 1352.4 | 3286.3 | 111.4             | 1088.1 | 3038.9 |
| 142.8                                             | 1374.7 | 3553.9 | 158.1             | 1353.0 | 3524.0 | 171.9  | 1380.3 | 3525.2 | 133.5             | 1096.5 | 3042.5 |
| 149.8                                             | 1382.5 | 3592.0 | 169.5             | 1376.4 | 3551.2 | 176.6  | 1391.4 | 3551.9 | 137.4             | 1100.4 | 3077.5 |
| 156.7                                             | 1393.4 | 3029.9 | 172.2             | 1380.9 | 3552.0 | 200.6  | 1406.9 | 3552.0 | 144.7             | 1123.6 | 3081.8 |
| 162.1                                             | 1395.9 | 3034.8 | 184.9             | 1395.8 | 3552.9 | 205.4  | 1434.7 | 3553.2 | 160.1             | 1187.5 | 3085.2 |
| 170.1                                             | 1467.6 | 3036.1 | 196.7             | 1467.0 | 3591.8 | 220.0  | 1444.2 | 3593.6 | 162.4             | 1199.6 | 3109.0 |
| 175.8                                             | 1467.8 |        | 207.8             | 1468.7 |        | 232.7  | 1457.1 |        | 163.3             | 1231.9 | 3115.6 |
| 195.4                                             | 1470.9 |        | 229.7             | 1469.4 |        | 246.3  | 1466.2 |        | 174.2             | 1246.7 | 3124.8 |
| 215.2                                             | 1472.1 |        | 245.5             | 1471.4 |        | 316.1  | 1467.3 |        | 175.4             | 1258.2 | 3132.6 |
| 225.1                                             | 1490.8 |        | 249.0             | 1472.9 |        | 374.2  | 1468.7 |        | 198.8             | 1260.9 | 3134.0 |

|         |        |        |       |        |        |        |        |        |       |        |        |
|---------|--------|--------|-------|--------|--------|--------|--------|--------|-------|--------|--------|
| 236.5   | 1507.7 |        | 379.3 | 1508.3 |        | 416.1  | 1471.5 |        | 203.2 | 1330.1 | 3137.9 |
| 249.0   | 1509.1 |        | 406.4 | 1510.7 |        | 455.1  | 1507.0 |        | 219.8 | 1352.5 | 3150.6 |
| 378.6   | 1512.0 |        | 421.8 | 1511.4 |        | 458.4  | 1508.7 |        | 230.7 | 1379.5 | 3168.8 |
| 410.3   | 1513.6 |        | 439.5 | 1512.8 |        | 510.3  | 1512.5 |        | 247.4 | 1392.9 | 3209.0 |
| 451.4   | 1523.8 |        | 468.0 | 1525.1 |        | 525.7  | 1513.0 |        | 314.9 | 1394.3 | 3226.2 |
| 508.0   | 1527.9 |        | 501.9 | 1526.8 |        | 531.9  | 1523.1 |        | 377.0 | 1406.5 | 3235.1 |
| 519.8   | 1530.0 |        | 516.9 | 1529.0 |        | 560.8  | 1527.8 |        | 419.2 | 1436.2 | 3250.7 |
| 547.7   | 1530.9 |        | 557.1 | 1530.6 |        | 594.6  | 1529.6 |        | 454.8 | 1445.0 | 3278.2 |
| 602.9   | 1663.5 |        | 598.8 | 1581.4 |        | 610.1  | 1532.3 |        | 455.7 | 1459.1 | 3295.0 |
| 745.7   | 1681.6 |        | 713.4 | 1663.8 |        | 653.5  | 1643.3 |        | 510.3 | 1467.1 | 3524.8 |
| 851.2   | 1696.4 |        | 822.1 | 1678.4 |        | 877.0  | 1663.5 |        | 524.3 | 1467.7 | 3546.9 |
| 935.7   | 1699.5 |        | 825.3 | 1696.0 |        | 931.2  | 1688.5 |        | 528.2 | 1469.6 | 3552.3 |
| 984.7   | 1709.5 |        | 919.5 | 1696.6 |        | 932.1  | 1706.6 |        | 563.5 | 1471.7 | 3553.3 |
| 987.6   | 1716.1 |        | 936.4 | 1745.6 |        | 986.1  | 1711.4 |        | 592.2 | 1491.7 | 3593.3 |
| EtTS2   |        |        | EtP2  |        |        | LacTS  |        |        | LacP  |        |        |
| -460.8  | 669.3  | 1506.8 | 11.1  | 753.6  | 1491.1 | -984.9 | 847.0  | 1495.1 | 17.8  | 920.0  | 1495.9 |
| 9.5     | 783.3  | 1508.7 | 20.3  | 855.3  | 1506.9 | 19.0   | 864.0  | 1504.7 | 19.9  | 927.1  | 1505.2 |
| 18.4    | 833.4  | 1512.3 | 22.2  | 894.3  | 1508.8 | 22.9   | 930.6  | 1506.0 | 25.0  | 948.5  | 1507.5 |
| 21.8    | 865.2  | 1513.0 | 27.5  | 932.6  | 1512.4 | 24.0   | 968.1  | 1507.6 | 33.6  | 986.3  | 1508.0 |
| 25.9    | 879.4  | 1523.2 | 40.9  | 953.7  | 1513.0 | 33.5   | 980.1  | 1509.4 | 35.8  | 987.7  | 1509.5 |
| 39.0    | 910.5  | 1527.8 | 46.4  | 986.3  | 1523.2 | 38.3   | 986.5  | 1511.9 | 43.6  | 994.4  | 1512.7 |
| 45.4    | 933.5  | 1529.6 | 50.4  | 988.0  | 1527.7 | 40.7   | 988.9  | 1523.2 | 56.6  | 1001.5 | 1523.1 |
| 48.8    | 986.1  | 1532.1 | 61.0  | 999.4  | 1529.5 | 52.2   | 997.1  | 1524.8 | 64.5  | 1002.8 | 1526.5 |
| 58.4    | 987.6  | 1592.9 | 69.3  | 1001.9 | 1532.3 | 53.3   | 998.2  | 1527.4 | 65.4  | 1033.6 | 1527.5 |
| 65.1    | 998.9  | 1639.8 | 81.3  | 1009.2 | 1633.2 | 63.6   | 1004.8 | 1530.0 | 71.7  | 1046.5 | 1529.9 |
| 70.7    | 1000.0 | 1663.5 | 87.5  | 1056.8 | 1663.5 | 75.3   | 1035.1 | 1663.9 | 78.0  | 1063.3 | 1663.0 |
| 86.3    | 1002.4 | 1688.2 | 96.1  | 1066.0 | 1688.8 | 78.5   | 1055.3 | 1691.2 | 99.8  | 1067.3 | 1685.7 |
| 88.7    | 1032.3 | 1707.2 | 100.2 | 1067.5 | 1707.8 | 83.4   | 1065.4 | 1703.9 | 108.2 | 1074.9 | 1695.3 |
| 97.6    | 1036.3 | 1711.0 | 100.8 | 1071.0 | 1711.8 | 100.3  | 1068.5 | 1716.7 | 124.0 | 1078.6 | 1703.4 |
| 100.1   | 1055.9 | 2994.9 | 108.6 | 1073.5 | 2979.3 | 107.7  | 1078.0 | 3015.7 | 128.4 | 1082.8 | 2907.6 |
| 105.8   | 1065.3 | 3029.4 | 116.5 | 1079.1 | 3025.6 | 127.7  | 1082.1 | 3025.0 | 134.4 | 1100.1 | 2994.2 |
| 110.3   | 1067.0 | 3030.0 | 132.9 | 1090.2 | 3028.7 | 129.2  | 1084.4 | 3026.8 | 146.2 | 1111.4 | 3024.8 |
| 132.1   | 1073.0 | 3032.2 | 133.2 | 1102.3 | 3029.3 | 134.1  | 1089.8 | 3028.0 | 147.6 | 1120.0 | 3027.7 |
| 136.5   | 1078.4 | 3039.2 | 137.2 | 1105.6 | 3031.0 | 140.9  | 1099.7 | 3029.4 | 155.5 | 1132.1 | 3028.6 |
| 141.3   | 1089.0 | 3062.8 | 142.1 | 1128.8 | 3038.7 | 143.3  | 1104.3 | 3037.5 | 172.2 | 1198.0 | 3035.8 |
| 160.0   | 1101.0 | 3079.0 | 162.4 | 1190.0 | 3042.4 | 148.3  | 1198.2 | 3040.2 | 191.0 | 1198.2 | 3036.9 |
| 161.6   | 1123.6 | 3080.7 | 163.3 | 1199.2 | 3056.4 | 181.7  | 1212.0 | 3051.1 | 211.5 | 1229.5 | 3039.1 |
| 164.4   | 1199.5 | 3085.3 | 177.0 | 1232.3 | 3078.1 | 187.2  | 1234.4 | 3065.6 | 227.0 | 1232.7 | 3070.2 |
| 175.0   | 1215.2 | 3108.5 | 199.9 | 1244.1 | 3079.9 | 215.0  | 1235.6 | 3074.4 | 231.6 | 1239.0 | 3070.9 |
| 198.3   | 1231.5 | 3117.8 | 204.9 | 1246.8 | 3083.0 | 231.5  | 1239.2 | 3076.4 | 243.3 | 1246.2 | 3073.8 |
| 203.1   | 1245.5 | 3122.3 | 220.4 | 1249.8 | 3083.8 | 239.7  | 1248.4 | 3082.8 | 245.4 | 1282.0 | 3079.5 |
| 219.2   | 1248.6 | 3135.3 | 229.3 | 1315.3 | 3098.4 | 250.7  | 1258.0 | 3087.9 | 341.6 | 1311.5 | 3081.3 |
| 222.9   | 1252.1 | 3137.3 | 243.1 | 1337.6 | 3108.1 | 279.3  | 1289.3 | 3106.2 | 365.2 | 1343.7 | 3082.7 |
| 240.2   | 1307.4 | 3146.3 | 254.7 | 1352.5 | 3117.6 | 375.6  | 1342.5 | 3109.9 | 410.9 | 1352.9 | 3098.9 |
| 256.3   | 1333.6 | 3151.1 | 303.2 | 1352.7 | 3121.5 | 415.8  | 1351.8 | 3111.8 | 417.4 | 1376.2 | 3108.8 |
| 311.3   | 1352.6 | 3155.4 | 374.5 | 1380.4 | 3134.9 | 429.1  | 1369.7 | 3113.1 | 445.4 | 1380.4 | 3114.4 |
| 374.9   | 1379.7 | 3210.3 | 389.2 | 1392.0 | 3137.1 | 445.6  | 1381.4 | 3119.6 | 464.2 | 1385.5 | 3116.0 |
| 384.0   | 1391.1 | 3221.9 | 417.1 | 1407.5 | 3154.9 | 468.4  | 1385.3 | 3130.3 | 474.8 | 1393.0 | 3116.9 |
| 417.2   | 1406.2 | 3246.4 | 458.8 | 1411.4 | 3197.4 | 488.2  | 1385.8 | 3135.2 | 485.5 | 1398.8 | 3122.7 |
| 457.1   | 1437.0 | 3248.3 | 492.2 | 1454.8 | 3237.4 | 494.8  | 1397.5 | 3173.0 | 515.3 | 1418.3 | 3139.2 |
| 509.2   | 1455.7 | 3249.7 | 512.1 | 1466.3 | 3250.2 | 533.2  | 1464.5 | 3193.4 | 529.4 | 1465.3 | 3228.7 |
| 523.7   | 1461.4 | 3291.7 | 528.5 | 1467.2 | 3283.9 | 575.3  | 1467.6 | 3297.4 | 566.1 | 1467.5 | 3372.7 |
| 529.2   | 1466.6 | 3524.7 | 562.5 | 1468.5 | 3525.0 | 609.7  | 1468.8 | 3525.4 | 614.3 | 1467.7 | 3525.1 |
| 560.7   | 1467.5 | 3551.1 | 571.0 | 1470.4 | 3551.3 | 623.9  | 1471.6 | 3553.8 | 617.3 | 1471.1 | 3553.2 |
| 572.9   | 1469.0 | 3552.1 | 599.2 | 1471.4 | 3551.9 | 649.9  | 1473.4 | 3554.5 | 734.5 | 1471.2 | 3555.3 |
| 590.9   | 1471.8 | 3553.3 | 614.1 | 1471.8 | 3553.1 | 748.2  | 1479.4 | 3555.6 | 837.9 | 1487.0 | 3558.6 |
| 613.6   | 1481.8 | 3593.0 | 657.7 | 1475.8 | 3593.4 | 813.8  | 1489.7 | 3593.7 | 871.2 | 1487.5 | 3594.5 |
| OHTS    |        |        | OHEtP |        |        |        |        |        |       |        |        |
| -1820.4 | 608.4  | 1510.5 | 9.6   | 598.8  | 1512.9 |        |        |        |       |        |        |
| 21.1    | 629.5  | 1513.1 | 16.5  | 629.3  | 1515.3 |        |        |        |       |        |        |
| 24.1    | 657.9  | 1514.4 | 36.3  | 636.0  | 1525.9 |        |        |        |       |        |        |
| 30.0    | 797.9  | 1523.7 | 44.4  | 846.4  | 1526.6 |        |        |        |       |        |        |



|       |        |        |       |        |        |  |  |  |  |  |  |
|-------|--------|--------|-------|--------|--------|--|--|--|--|--|--|
| 42.0  | 1353.4 | 1529.2 | 51.6  | 881.4  | 1527.3 |  |  |  |  |  |  |
| 46.6  | 1375.2 | 1530.2 | 55.8  | 939.4  | 1527.8 |  |  |  |  |  |  |
| 51.4  | 877.8  | 1531.9 | 64.9  | 949.0  | 1532.3 |  |  |  |  |  |  |
| 63.6  | 937.0  | 1629.2 | 68.4  | 964.7  | 1662.9 |  |  |  |  |  |  |
| 74.2  | 983.2  | 1663.8 | 71.9  | 985.7  | 1673.7 |  |  |  |  |  |  |
| 79.1  | 987.1  | 1679.3 | 81.8  | 1000.8 | 1687.0 |  |  |  |  |  |  |
| 87.3  | 996.3  | 1696.6 | 88.5  | 1008.1 | 1699.4 |  |  |  |  |  |  |
| 95.2  | 997.7  | 1700.2 | 98.3  | 1023.7 | 1701.1 |  |  |  |  |  |  |
| 99.8  | 1041.4 | 1814.7 | 112.4 | 1026.2 | 3012.5 |  |  |  |  |  |  |
| 112.1 | 1052.4 | 3034.6 | 116.1 | 1063.3 | 3028.3 |  |  |  |  |  |  |
| 132.9 | 1054.9 | 3035.7 | 120.8 | 1068.7 | 3031.8 |  |  |  |  |  |  |
| 138.4 | 1063.5 | 3038.1 | 130.4 | 1071.2 | 3032.6 |  |  |  |  |  |  |
| 144.0 | 1066.1 | 3041.3 | 140.9 | 1078.8 | 3078.5 |  |  |  |  |  |  |
| 159.2 | 1071.0 | 3086.3 | 144.1 | 1085.8 | 3091.0 |  |  |  |  |  |  |
| 164.3 | 1079.4 | 3089.1 | 162.7 | 1195.4 | 3094.7 |  |  |  |  |  |  |
| 177.3 | 1086.2 | 3089.9 | 173.8 | 1200.0 | 3099.3 |  |  |  |  |  |  |
| 193.4 | 1113.1 | 3109.3 | 186.0 | 1202.9 | 3110.2 |  |  |  |  |  |  |
| 194.9 | 1200.6 | 3112.6 | 198.9 | 1208.4 | 3124.8 |  |  |  |  |  |  |
| 210.4 | 1204.6 | 3123.9 | 210.1 | 1228.3 | 3133.9 |  |  |  |  |  |  |
| 212.7 | 1227.7 | 3133.4 | 212.9 | 1243.9 | 3135.6 |  |  |  |  |  |  |
| 226.2 | 1229.8 | 3137.6 | 236.8 | 1305.0 | 3145.3 |  |  |  |  |  |  |
| 240.0 | 1239.1 | 3137.9 | 314.6 | 1363.5 | 3185.2 |  |  |  |  |  |  |
| 278.1 | 1259.1 | 3164.6 | 339.1 | 1371.4 | 3243.5 |  |  |  |  |  |  |
| 373.1 | 1377.1 | 3251.1 | 404.9 | 1373.8 | 3317.6 |  |  |  |  |  |  |
| 373.7 | 1382.6 | 3338.5 | 417.4 | 1390.8 | 3403.3 |  |  |  |  |  |  |
| 400.7 | 1396.0 | 3349.9 | 453.6 | 1401.8 | 3487.0 |  |  |  |  |  |  |
| 457.8 | 1467.4 | 3378.8 | 467.1 | 1466.5 | 3493.0 |  |  |  |  |  |  |
| 504.1 | 1468.8 | 3523.4 | 477.1 | 1467.4 | 3558.6 |  |  |  |  |  |  |
| 518.0 | 1469.8 | 3552.2 | 492.8 | 1468.0 | 3578.5 |  |  |  |  |  |  |
| 520.2 | 1472.0 | 3555.7 | 550.6 | 1469.6 | 3584.3 |  |  |  |  |  |  |
| 535.8 | 1492.0 | 3556.7 | 575.9 | 1506.6 | 3585.9 |  |  |  |  |  |  |
| 591.0 | 1509.2 | 3591.1 | 582.0 | 1507.8 | 3828.5 |  |  |  |  |  |  |

**Table S15.** Electronic energy (a.u.) of the structures along the reaction pathway of  $\text{Li(X)} + \text{CO}_2 + 2\text{H}_2 \rightarrow \text{CH}_2(\text{OH})_2$  ( $\text{X} = \text{NH}_3, \text{H}_2\text{O}$ ) at CCSD(T) with double- $\zeta$  basis sets, CC(DZ), and MP2 with double- $\zeta$ , MP2(DZ), and triple- $\zeta$ , MP2(TZ) basis sets. Values used in Figure S2 comparison of CCSD(T) and CAM-B3LYP energetics. R (reactants) denotes the energy of  $\text{Li(X)} \cdots \text{CO}_2 \cdots 2\text{H}_2$  and P (products) denotes the energy of  $\text{Li(X)} \cdots \text{CH}_2(\text{OH})_2$ .

|                   | Li(NH <sub>3</sub> ) <sub>4</sub> |             |             | Li(H <sub>2</sub> O) <sub>4</sub> |             |             |
|-------------------|-----------------------------------|-------------|-------------|-----------------------------------|-------------|-------------|
|                   | CC(DZ)                            | MP2(DZ)     | MP2(TZ)     | CC(DZ)                            | MP2(DZ)     | MP2(TZ)     |
| R                 | -423.274095                       | -423.551664 | -423.990146 | -503.029912                       | -502.945839 | -503.451355 |
| CO <sub>2</sub> r | -423.281832                       | -423.560060 | -423.994565 | -503.041491                       | -502.957009 | -503.460124 |
| eTS1              | -423.276135                       | -423.554980 | -423.988323 | -503.034916                       | -502.950993 | -503.453712 |
| CO <sub>2</sub> p | -423.297202                       | -423.571260 | -424.011232 | -503.061219                       | -502.974195 | -503.482113 |
| H <sub>2</sub> r1 | -423.301954                       | -423.576352 | -424.014272 | -503.065544                       | -502.978364 | -503.484730 |
| CHTS1             | -423.276075                       | -423.552475 | -423.989270 | -503.041380                       | -502.954705 | -503.459358 |
| CHp1              | -423.282672                       | -423.562866 | -423.999220 | -503.050582                       | -502.969871 | -503.475534 |
| OHTS1             | -423.271586                       | -423.548744 | -423.983504 | -503.043849                       | -502.957320 | -503.460456 |
| OHp1              | -423.289411                       | -423.562307 | -423.997236 | -503.053005                       | -502.964811 | -503.468276 |
| eTS2              | -423.284432                       | -423.558764 | -423.992419 | -503.038758                       | -502.948669 | -503.458690 |
| rFA               | -423.290013                       | -423.565533 | -424.003691 | -503.066456                       | -502.978298 | -503.484929 |
| H <sub>2</sub> r2 | -423.295253                       | -423.571044 | -424.007143 | -503.071763                       | -502.982890 | -503.487640 |
| CHTS2             | -423.271939                       | -423.550625 | -423.980691 | -503.052037                       | -502.963847 | -503.464475 |
| CHp2              | -423.269162                       | -423.551548 | -423.984940 | -503.055984                       | -502.972028 | -503.473450 |
| OHTS2             | -423.271739                       | -423.550205 | -423.983761 | -503.050616                       | -502.963673 | -503.465706 |
| OHp2              | -423.270014                       | -423.585334 | -424.018990 | -503.081938                       | -502.992714 | -503.494038 |
| P                 | -423.299005                       | -423.571885 | -424.010266 | -503.055130                       | -502.966060 | -503.471475 |

**Table S16.** Electronic Energy, enthalpy, and free energy of the structures along the reaction pathway of  $\text{Li}(X) + \text{CO}_2 + 2\text{H}_2 \rightarrow \text{CH}_2(\text{OH})_2$  ( $X = \text{NH}_3, \text{NH}_2\text{CH}_3, \text{NH}_2\text{CH}_2\text{CH}_3, \text{H}_2\text{O}, \text{CH}_3\text{OH}$ ) at CAM-B3LYP. These values were used for Figures 1 and 2.

|                       | $\text{NH}_3$        |                                |                                | $\text{NH}_2\text{CH}_3$       |                                |                                | $\text{NH}_2\text{CH}_2\text{CH}_3$ |                                |                                |
|-----------------------|----------------------|--------------------------------|--------------------------------|--------------------------------|--------------------------------|--------------------------------|-------------------------------------|--------------------------------|--------------------------------|
|                       | -E(a.u.)             | $-\Delta\text{H}(\text{a.u.})$ | $-\Delta\text{G}(\text{a.u.})$ | $-\Delta\text{E}(\text{a.u.})$ | $-\Delta\text{H}(\text{a.u.})$ | $-\Delta\text{G}(\text{a.u.})$ | -E(a.u.)                            | $-\Delta\text{H}(\text{a.u.})$ | $-\Delta\text{G}(\text{a.u.})$ |
| SEP                   | 233.791296           | 233.628588                     | 233.685142                     | 390.937396                     | 390.652391                     | 390.722689                     | 548.158864                          | 547.754406                     | 547.837160                     |
| $\text{CO}_2\text{r}$ | 422.388125           | 422.208546                     | 422.278698                     | 579.535766                     | 579.233986                     | 579.318450                     | 736.757649                          | 736.336501                     | 736.433702                     |
| eTS1                  | 422.384014           | 422.206543                     | 422.273705                     | 579.535152                     | 579.235071                     | 579.317255                     | 736.758236                          | 736.352103                     | 736.446166                     |
| $\text{CO}_2\text{p}$ | 422.412669           | 422.232517                     | 422.295955                     | 579.569194                     | 579.267218                     | 579.344617                     | 736.794357                          | 736.373085                     | 736.464362                     |
| $\text{H}_2\text{r1}$ | 423.586664           | 423.391189                     | 423.461990                     | 580.743026                     | 580.425777                     | 580.511292                     | 737.966423                          | 737.530224                     | 737.629958                     |
| CHTS1                 | 423.563052           | 423.371473                     | 423.436791                     | 580.719228                     | 580.405773                     | 580.484353                     | 737.944393                          | 737.511647                     | 737.604986                     |
| CHp1                  | 423.565437           | 423.369843                     | 423.438101                     | 580.719936                     | 580.403035                     | 580.486251                     | 737.944722                          | 737.508402                     | 737.605719                     |
| OHTS1                 | 423.554691           | 423.358742                     | 423.423797                     | 580.710363                     | 580.392696                     | 580.472594                     | 737.935222                          | 737.498234                     | 737.592361                     |
| OHp1                  | 423.567678           | 423.364832                     | 423.433200                     | 580.720160                     | 580.395575                     | 580.475892                     | 737.943716                          | 737.499924                     | 737.594332                     |
| eTS2                  | 423.564494           | 423.363855                     | 423.429091                     | 580.716958                     | 580.394240                     | 580.472818                     | 737.938951                          | 737.497282                     | 737.589419                     |
| rFA                   | 423.576776           | 423.374602                     | 423.438293                     | 580.732841                     | 580.409023                     | 580.488231                     | 737.956990                          | 737.513955                     | 737.594332                     |
| $\text{H}_2\text{r2}$ | 424.751106           | 424.533524                     | 424.604195                     | 581.907087                     | 581.567862                     | 581.654103                     | 739.130667                          | 738.672172                     | 738.771451                     |
| CHTS2                 | 424.722451           | 424.508231                     | 424.564835                     | 581.877225                     | 581.543121                     | 581.611060                     | 739.099626                          | 738.647014                     | 738.724337                     |
| CHp2                  | 424.725178           | 424.506203                     | 424.573212                     | 581.882826                     | 581.541545                     | 581.623121                     | 739.107030                          | 738.646482                     | 738.739469                     |
| OHTS2                 | 424.724865           | 424.506481                     | 424.572782                     | 581.882679                     | 581.542241                     | 581.622982                     | 739.105104                          | 738.645801                     | 738.741657                     |
| OHp2                  | 424.760810           | 424.533473                     | 424.603061                     | 581.913563                     | 581.563799                     | 581.646154                     | 739.136588                          | 738.667409                     | 738.762115                     |
|                       | $\text{H}_2\text{O}$ |                                |                                | $\text{CH}_3\text{OH}$         |                                |                                |                                     |                                |                                |
|                       | -E(a.u.)             | $-\Delta\text{H}(\text{a.u.})$ | $-\Delta\text{G}(\text{a.u.})$ | -E(a.u.)                       | $-\Delta\text{H}(\text{a.u.})$ | $-\Delta\text{G}(\text{a.u.})$ | -E(a.u.)                            | $-\Delta\text{H}(\text{a.u.})$ | $-\Delta\text{G}(\text{a.u.})$ |
| SEP                   | 313.309898           | 313.200937                     | 313.253401                     | 470.441637                     | 470.210209                     | 470.279448                     | $\text{H}_2$                        |                                |                                |
| $\text{CO}_2\text{r}$ | 501.911645           | 501.785504                     | 501.850687                     | 659.041785                     | 658.794569                     | 658.875953                     | 1.171609                            | 1.158264                       | 1.173063                       |
| eTS1                  | 501.905457           | 501.781466                     | 501.846342                     | 659.039911                     | 658.794824                     | 658.864216                     | $\text{CO}_2$                       |                                |                                |
| $\text{CO}_2\text{p}$ | 501.942292           | 501.815733                     | 501.873967                     | 659.088960                     | 658.839430                     | 658.916336                     | 188.594168                          | 188.578722                     | 188.603603                     |
| $\text{H}_2\text{r1}$ | 503.115884           | 502.974057                     | 503.041186                     | 660.262256                     | 659.997551                     | 660.083074                     | $\text{CH}_2\text{O}_2$             |                                |                                |
| CHTS1                 | 503.093917           | 502.956540                     | 503.016570                     | 660.239641                     | 659.979234                     | 660.058200                     | 189.766492                          | 189.728539                     | 189.756783                     |
| CHp1                  | 503.098337           | 502.957102                     | 503.021999                     | 660.243997                     | 659.979251                     | 660.061155                     | $\text{CH}_2(\text{OH})_2$          |                                |                                |
| OHTS1                 | 503.089000           | 502.946247                     | 503.004608                     | 660.227007                     | 659.961860                     | 660.040089                     | 190.963222                          | -190.900830                    | 190.929872                     |
| OHp1                  | 503.096933           | 502.947877                     | 503.012022                     | 660.232244                     | 659.961255                     | 660.041439                     | $\text{C}_2\text{H}_4$              |                                |                                |
| eTS2                  | 503.092772           | 502.947725                     | 503.000193                     | 660.227057                     | 659.957217                     | 660.037009                     | 78.567649                           | 78.512323                      | 78.537148                      |
| rFA                   | 503.115568           | 502.966221                     | 503.023576                     | 660.259945                     | 659.988375                     | 660.065304                     | $\delta$ -Lactone                   |                                |                                |
| $\text{H}_2\text{r2}$ | 504.289382           | 504.124420                     | 504.191654                     | 661.433604                     | 661.146687                     | 661.230956                     | 345.774684                          | 345.638959                     | 345.676394                     |
| CHTS2                 | 504.266175           | 504.105467                     | 504.162149                     | 661.402996                     | 661.121391                     | 661.188450                     |                                     |                                |                                |
| CHp2                  | 504.266844           | 504.100147                     | 504.160364                     | 661.407769                     | 661.121121                     | 661.203854                     |                                     |                                |                                |
| OHTS2                 | 504.263558           | 504.097058                     | 504.154609                     | 661.404633                     | 661.117361                     | 661.186232                     |                                     |                                |                                |
| OHp2                  | 504.292060           | 504.117668                     | 504.178928                     | 661.427702                     | 661.131209                     | 661.211058                     |                                     |                                |                                |

**Table S17.** Electronic energy, enthalpy, and free energy of the structures along the reaction pathway of  $\text{Li(X)} + 2 \text{C}_2\text{H}_4 + \text{CO}_2 \rightarrow \text{Li(X)} + \text{C}_5\text{H}_8\text{O}_2$  ( $\text{X} = \text{NH}_3, \text{NH}_2\text{CH}_3$ ) at CAM-B3LYP. These values were used for Figure 3.

|                       | $\text{NH}_3$ |                         |                         | $\text{NH}_2\text{CH}_3$ |                         |                         |
|-----------------------|---------------|-------------------------|-------------------------|--------------------------|-------------------------|-------------------------|
|                       | -E(a.u.)      | $-\Delta\text{H(a.u.)}$ | $-\Delta\text{G(a.u.)}$ | -E(a.u.)                 | $-\Delta\text{H(a.u.)}$ | $-\Delta\text{G(a.u.)}$ |
| SEP                   | 233.791296    | 233.628588              | 233.685142              | 390.937396               | 390.652391              | 390.722689              |
| $\text{CO}_2\text{r}$ | 422.388125    | 422.208546              | 422.278698              | 579.535766               | 579.233986              | 579.318450              |
| eTS1                  | 422.384014    | 422.206543              | 422.273705              | 579.535152               | 579.235071              | 579.317255              |
| $\text{CO}_2\text{p}$ | 422.412669    | 422.232517              | 422.295955              | 579.569194               | 579.267218              | 579.344617              |
| EtR                   | 500.985266    | 500.747584              | 500.824017              | 658.140925               | 657.781531              | 657.873140              |
| EtTS1                 | 500.970722    | 500.734663              | 500.806279              | 658.126538               | 657.768802              | 657.855275              |
| EtP                   | 501.009877    | 500.772878              | 500.845225              | 658.165890               | 657.807098              | 657.893122              |
| EtR2                  | 579.581849    | 579.287298              | 579.373134              | 736.737279               | 736.320998              | 736.421424              |
| EtTS2                 | 579.567070    | 579.273026              | 579.351628              | 736.722832               | 736.307032              | 736.400141              |
| EtP2                  | 579.615371    | 579.318386              | 579.397846              | 736.771558               | 736.352643              | 736.444956              |
| LacTS                 | 579.555094    | 579.258380              | 579.331824              | 736.711077               | 736.292722              | 736.381259              |
| LacP                  | 579.575164    | 579.273583              | 579.350646              | 736.742512               | 736.320919              | 736.408466              |

**Table S18.** Electronic energy, enthalpy, and free energy of the structures along the reaction 1-4 (a.u.) and enthalpy/free energy of reaction (kcal/mol) at CAM-B3LYP. These values were used for Figure 4.

| Reaction 1        | $-\Delta\text{E(a.u.)}$ | ZPE(a.u.)                        | $-\Delta\text{H(a.u.)}$ | $-\Delta\text{G(a.u.)}$ |
|-------------------|-------------------------|----------------------------------|-------------------------|-------------------------|
| $\text{CO}_2$     | 188.594168              | 0.011897                         | 188.578722              | 188.603603              |
| Ethene            | 78.567649               | 0.051353                         | 78.512323               | 78.537148               |
| $\delta$ -lactone | 345.774684              | 0.128588                         | 345.638959              | 345.676394              |
|                   |                         | $\Delta_{\text{rxn}}$ (kcal/mol) | -22.33                  | 0.94                    |
| Reaction 2        | $-\Delta\text{E(a.u.)}$ | ZPE(a.u.)                        | $-\Delta\text{H(a.u.)}$ | $-\Delta\text{G(a.u.)}$ |
| $\text{CO}_2$     | 188.594168              | 0.011897                         | 188.578722              | 188.603603              |
| Butadiene         | 155.947359              | 0.085755                         | 155.856017              | 155.887558              |
| Product 2         | 344.545714              | 0.104155                         | 344.434504              | 344.472513              |
|                   |                         | $\Delta_{\text{rxn}}$ (kcal/mol) | 0.15                    | 11.70                   |
| Reaction 3        | $-\Delta\text{E(a.u.)}$ | ZPE(a.u.)                        | $-\Delta\text{H(a.u.)}$ | $-\Delta\text{G(a.u.)}$ |
| $\text{CO}_2$     | 188.594168              | 0.011897                         | 188.578722              | 188.603603              |
| Octadiene         | 313.154281              | 0.200613                         | 312.943015              | 312.989641              |
| Product 3         | 501.789621              | 0.223032                         | 501.556279              | 501.601205              |
|                   |                         | $\Delta_{\text{rxn}}$ (kcal/mol) | -21.68                  | -5.00                   |
| Reaction 4        | $-\Delta\text{E(a.u.)}$ | ZPE(a.u.)                        | $-\Delta\text{H(a.u.)}$ | $-\Delta\text{G(a.u.)}$ |
| $\text{CO}_2$     | 188.594168              | 0.011897                         | 188.578722              | 188.603603              |
| O-Xylxylene       | 309.526744              | 0.133579                         | 309.385561              | 309.423243              |
| Product 4         | 498.167359              | 0.152600                         | 498.005714              | 498.048092              |
|                   |                         | $\Delta_{\text{rxn}}$ (kcal/mol) | -26.00                  | -13.33                  |

**Table S19.** Harmonic vibrational frequencies (cm<sup>-1</sup>) for the reactants and products listed in Figure 4.

| Product 4   |        |        | C <sub>2</sub> H <sub>4</sub> |        |        | Butadiene |        |        | Octadiene |        |        |
|-------------|--------|--------|-------------------------------|--------|--------|-----------|--------|--------|-----------|--------|--------|
| 75.9        | 892.9  | 1366.1 | 842.0                         | 1254.7 | 3147.1 | 169.5     | 1035.3 | 1716.6 | 22.7      | 979.7  | 1487.9 |
| 149.8       | 926.3  | 1427.8 | 991.8                         | 1391.0 | 3163.9 | 280.2     | 1050.9 | 1727.8 | 82.8      | 1020.4 | 1497.2 |
| 193.7       | 963.1  | 1470.0 | 1010.2                        | 1483.9 | 3219.5 | 474.8     | 1082.2 | 3149.8 | 97.4      | 1045.2 | 1500.5 |
| 260.6       | 1005.0 | 1514.7 | 1072.4                        | 1719.2 | 3245.9 | 634.0     | 1118.7 | 3156.4 | 100.0     | 1056.6 | 1502.5 |
| 340.3       | 1031.3 | 1520.2 |                               |        |        | 771.3     | 1325.4 | 3160.4 | 164.0     | 1058.6 | 1737.4 |
| 399.7       | 1037.9 | 1553.2 |                               |        |        | 896.2     | 1354.9 | 3168.9 | 256.9     | 1106.9 | 1739.2 |
| 436.6       | 1073.9 | 1670.0 |                               |        |        | 976.8     | 1449.9 | 3242.4 | 282.9     | 1138.4 | 3026.2 |
| 471.3       | 1103.0 | 1692.2 |                               |        |        | 978.9     | 1477.1 | 3243.9 | 358.3     | 1159.3 | 3030.7 |
| 515.7       | 1147.8 | 1864.6 |                               |        |        |           |        |        | 405.7     | 1238.5 | 3039.7 |
| 563.8       | 1180.1 | 3028.3 | CO <sub>2</sub>               |        |        |           |        |        | 447.1     | 1247.8 | 3047.2 |
| 571.8       | 1190.4 | 3035.2 | 686.2                         | 1399.5 | 2450.6 |           |        |        | 468.5     | 1290.4 | 3064.4 |
| 652.9       | 1222.5 | 3140.4 | 686.2                         |        |        |           |        |        | 637.7     | 1309.4 | 3070.1 |
| 719.3       | 1253.6 | 3150.6 |                               |        |        |           |        |        | 648.7     | 1336.4 | 3082.6 |
| 768.4       | 1264.4 | 3185.3 |                               |        |        |           |        |        | 799.1     | 1338.2 | 3110.3 |
| 779.0       | 1284.1 | 3190.3 |                               |        |        |           |        |        | 827.4     | 1370.1 | 3134.4 |
| 797.9       | 1302.9 | 3203.1 |                               |        |        |           |        |        | 858.4     | 1379.7 | 3139.4 |
| 844.6       | 1334.5 | 3216.8 |                               |        |        |           |        |        | 920.9     | 1400.9 | 3150.9 |
|             |        |        |                               |        |        |           |        |        | 948.6     | 1411.4 | 3151.3 |
|             |        |        |                               |        |        |           |        |        | 966.8     | 1466.0 | 3230.5 |
|             |        |        |                               |        |        |           |        |        | 971.0     | 1467.1 | 3230.8 |
| O-Xylxylene |        |        | δ-lactone                     |        |        | Product 2 |        |        | Product 3 |        |        |
| 81.0        | 883.4  | 1462.9 | 96.4                          | 1007.7 | 1474.5 | 42.5      | 978.0  | 1450.2 | 70.0      | 999.3  | 1425.3 |
| 232.7       | 946.1  | 1490.0 | 147.1                         | 1082.2 | 1496.6 | 102.1     | 993.7  | 1465.7 | 112.6     | 1063.4 | 1447.9 |
| 353.9       | 949.5  | 1643.6 | 324.8                         | 1132.0 | 1512.7 | 383.2     | 1023.8 | 1517.2 | 176.6     | 1080.6 | 1474.3 |
| 415.4       | 968.2  | 1672.4 | 420.0                         | 1138.1 | 1531.2 | 457.2     | 1050.0 | 1783.9 | 197.1     | 1101.1 | 1498.6 |
| 438.1       | 981.2  | 1683.9 | 463.8                         | 1192.9 | 1850.9 | 527.4     | 1150.9 | 1853.9 | 268.9     | 1107.4 | 1500.1 |
| 442.3       | 1020.5 | 1745.9 | 510.2                         | 1218.3 | 3047.5 | 560.8     | 1184.8 | 3052.7 | 326.9     | 1140.1 | 1503.0 |
| 522.6       | 1023.1 | 3167.6 | 571.9                         | 1282.8 | 3048.9 | 567.7     | 1238.2 | 3066.6 | 334.0     | 1148.4 | 1514.3 |
| 594.7       | 1027.3 | 3170.9 | 668.6                         | 1296.1 | 3056.2 | 695.6     | 1274.9 | 3077.2 | 383.6     | 1165.6 | 1527.4 |
| 665.5       | 1196.5 | 3183.6 | 768.4                         | 1317.8 | 3060.8 | 772.0     | 1283.0 | 3088.5 | 403.7     | 1179.8 | 1849.0 |
| 712.6       | 1197.7 | 3189.2 | 844.1                         | 1377.4 | 3100.0 | 920.8     | 1380.1 | 3180.9 | 469.5     | 1216.8 | 3000.5 |
| 736.0       | 1275.1 | 3203.2 | 897.4                         | 1390.8 | 3103.1 | 955.6     | 1437.7 | 3202.1 | 481.5     | 1243.0 | 3013.9 |
| 767.7       | 1346.2 | 3213.4 | 949.8                         | 1404.6 | 3125.5 |           |        |        | 513.6     | 1266.8 | 3027.6 |
| 818.8       | 1391.3 | 3250.7 | 957.0                         | 1443.5 | 3131.7 |           |        |        | 571.1     | 1269.2 | 3028.9 |
| 856.0       | 1458.5 | 3255.0 |                               |        |        |           |        |        | 620.5     | 1299.3 | 3033.7 |
|             |        |        |                               |        |        |           |        |        | 718.2     | 1320.9 | 3040.0 |
|             |        |        |                               |        |        |           |        |        | 777.4     | 1321.2 | 3046.3 |
|             |        |        |                               |        |        |           |        |        | 816.5     | 1339.2 | 3051.3 |
|             |        |        |                               |        |        |           |        |        | 848.8     | 1364.9 | 3075.8 |
|             |        |        |                               |        |        |           |        |        | 877.1     | 1375.2 | 3076.5 |
|             |        |        |                               |        |        |           |        |        | 884.5     | 1390.9 | 3086.1 |
|             |        |        |                               |        |        |           |        |        | 947.2     | 1395.7 | 3088.5 |
|             |        |        |                               |        |        |           |        |        | 963.8     | 1405.3 | 3116.2 |
|             |        |        |                               |        |        |           |        |        | 980.5     | 1414.9 | 3122.4 |

**Table S20.** Cartesian Coordinates (Å) for the reactants and products listed in Figure 4.

| CO <sub>2</sub> |           |           | C <sub>2</sub> H <sub>4</sub> |   |           | Butadiene |           |   |           |           |           |
|-----------------|-----------|-----------|-------------------------------|---|-----------|-----------|-----------|---|-----------|-----------|-----------|
| C               | 0.000000  | 0.000000  | -0.000010                     | C | -0.000000 | -0.000000 | 0.659538  | C | -0.108097 | -1.529297 | -0.485144 |
| O               | 0.000000  | 0.000000  | -1.155618                     | C | 0.000000  | -0.000000 | -0.659538 | C | 0.108097  | -0.724870 | 0.545349  |
| O               | -0.000000 | -0.000000 | 1.155626                      | H | 0.000000  | 0.920763  | 1.227183  | C | -0.108097 | 0.724870  | 0.545349  |
|                 |           |           |                               | H | -0.000000 | -0.920763 | 1.227183  | C | 0.108097  | 1.529297  | -0.485144 |
|                 |           |           |                               | H | 0.000000  | 0.920763  | -1.227183 | H | -0.452814 | 1.153503  | 1.480108  |
|                 |           |           |                               | H | -0.000000 | -0.920763 | -1.227183 | H | 0.502934  | 1.155872  | -1.420583 |
|                 |           |           |                               |   |           |           |           | H | -0.088835 | 2.589704  | -0.420755 |
|                 |           |           |                               |   |           |           |           | H | 0.088835  | -2.589704 | -0.420755 |
|                 |           |           |                               |   |           |           |           | H | -0.502934 | -1.155872 | -1.420583 |
|                 |           |           |                               |   |           |           |           | H | 0.452814  | -1.153503 | 1.480108  |
| Octadiene       |           |           | O-Xylxylene                   |   |           | δ-lactone |           |   |           |           |           |
| C               | -2.278629 | 0.218657  | 0.006590                      | C | -0.197770 | 1.475966  | -1.717885 | C | -1.719179 | -0.061151 | 0.324971  |
| C               | 1.737631  | 0.775799  | -0.353278                     | C | 0.008481  | 0.743026  | -0.619850 | C | -0.960800 | -1.266976 | -0.174499 |
| C               | -1.203205 | -0.138792 | 0.982638                      | C | -0.008481 | -0.743026 | -0.619850 | C | -1.117156 | 1.190316  | -0.287626 |
| C               | 1.743687  | -0.705060 | -0.566406                     | C | 0.197770  | -1.475966 | -1.717885 | H | -1.663922 | -0.012132 | 1.414570  |
| C               | -0.451926 | -1.421903 | 0.609473                      | C | 0.197770  | 1.394957  | 0.671330  | H | -2.769711 | -0.175425 | 0.057485  |
| C               | 0.365749  | -1.365242 | -0.681131                     | C | -0.197770 | -1.394957 | 0.671330  | C | 0.349863  | 1.276046  | 0.106030  |
| C               | 2.414032  | 1.416672  | 0.584136                      | C | 0.123990  | 0.714433  | 1.818360  | H | -1.643945 | 2.086779  | 0.036164  |
| C               | -2.394100 | 1.377485  | -0.618531                     | C | -0.123990 | -0.714433 | 1.818360  | H | -1.212701 | 1.143328  | -1.374682 |
| H               | -3.017281 | -0.554698 | -0.186648                     | H | -0.348294 | -2.465998 | 0.671843  | H | 0.436216  | 1.582227  | 1.151411  |
| H               | -1.681950 | 2.177512  | -0.458993                     | H | -0.229693 | -1.226491 | 2.764453  | H | 0.899447  | 2.014301  | -0.472297 |
| H               | -3.205698 | 1.573322  | -1.305340                     | H | 0.348294  | 2.465998  | 0.671843  | C | 1.129571  | -0.017063 | 0.013435  |
| H               | -1.662918 | -0.294025 | 1.962815                      | H | 0.229693  | 1.226491  | 2.764453  | O | 0.455987  | -1.183926 | 0.035733  |
| H               | -0.511181 | 0.694447  | 1.090727                      | H | -0.437332 | 1.030406  | -2.671587 | O | 2.325566  | -0.039155 | -0.009721 |
| H               | 0.204365  | -1.700667 | 1.437116                      | H | -0.150350 | 2.554902  | -1.676438 | H | -1.125559 | -1.402069 | -1.245790 |
| H               | -1.184243 | -2.228200 | 0.522356                      | H | 0.437332  | -1.030406 | -2.671587 | H | -1.266043 | -2.179396 | 0.331168  |
| H               | 2.317292  | -1.184597 | 0.229988                      | H | 0.150350  | -2.554902 | -1.676438 |   |           |           |           |
| H               | 2.282307  | -0.905390 | -1.497401                     |   |           |           |           |   |           |           |           |
| H               | 0.523489  | -2.386576 | -1.031100                     |   |           |           |           |   |           |           |           |
| H               | -0.212984 | -0.865693 | -1.461358                     |   |           |           |           |   |           |           |           |
| H               | 1.138909  | 1.349960  | -1.054385                     |   |           |           |           |   |           |           |           |
| H               | 3.022610  | 0.884666  | 1.304844                      |   |           |           |           |   |           |           |           |
| H               | 2.387844  | 2.494244  | 0.666440                      |   |           |           |           |   |           |           |           |
| Product 2       |           |           | Product 3                     |   |           | Product 4 |           |   |           |           |           |
| C               | 1.069639  | -1.233903 | 0.000100                      | C | 0.802781  | 1.608974  | 0.205187  | C | 0.706685  | 1.591693  | 0.386642  |
| C               | 1.770311  | 0.075465  | 0.000003                      | C | -0.342064 | 0.750756  | -0.280099 | C | -0.506266 | 0.743899  | 0.168037  |
| C               | 1.130514  | 1.226854  | -0.000073                     | C | -0.192834 | -0.645061 | 0.312721  | C | -0.325446 | -0.628487 | 0.258764  |
| C               | -0.357996 | 1.294078  | 0.000046                      | C | 1.150501  | -1.216186 | -0.111294 | C | 1.064252  | -1.104129 | 0.564485  |
| C               | -1.074232 | -0.034675 | 0.000021                      | C | 2.331450  | -0.276157 | -0.028324 | C | 2.119841  | -0.280054 | -0.137460 |
| H               | -0.730601 | 1.844202  | -0.865831                     | H | 1.101930  | -1.520717 | -1.160716 | H | 1.223810  | -2.143150 | 0.294635  |
| H               | -0.730440 | 1.844155  | 0.866029                      | H | 1.418838  | -2.108635 | 0.449906  | H | 1.259547  | -1.017158 | 1.639117  |
| H               | 2.851376  | 0.030984  | 0.000004                      | O | 3.461961  | -0.668530 | -0.027249 | O | 3.127065  | -0.735903 | -0.590489 |
| H               | 1.676160  | 2.161022  | -0.000144                     | O | 2.101002  | 1.051161  | -0.033254 | O | 1.874103  | 1.040503  | -0.237574 |
| O               | -2.268046 | -0.105182 | 0.000030                      | H | 0.709517  | 1.783178  | 1.280190  | H | 0.913941  | 1.712595  | 1.453822  |
| O               | -0.356770 | -1.171052 | -0.000164                     | H | 0.816150  | 2.576830  | -0.291290 | H | 0.591287  | 2.580367  | -0.047106 |
| H               | 1.351183  | -1.818586 | 0.877917                      | C | -1.687478 | 1.374589  | 0.075516  | C | -1.757004 | 1.266391  | -0.109672 |
| H               | 1.351439  | -1.818819 | -0.877476                     | H | -0.273904 | 0.666808  | -1.370795 | C | -1.400853 | -1.477357 | 0.062559  |
|                 |           |           |                               | C | -1.355980 | -1.548059 | -0.080259 | C | -2.835739 | 0.415925  | -0.286891 |
|                 |           |           |                               | H | -0.200592 | -0.538644 | 1.404068  | C | -2.655957 | -0.954623 | -0.203235 |
|                 |           |           |                               | C | -2.846245 | 0.467364  | -0.325000 | H | -1.258152 | -2.548324 | 0.115785  |
|                 |           |           |                               | H | -1.786038 | 2.350905  | -0.402290 | H | -3.494172 | -1.619835 | -0.354328 |
|                 |           |           |                               | H | -1.724498 | 1.549929  | 1.155029  | H | -1.889340 | 2.337040  | -0.193254 |
|                 |           |           |                               | C | -2.699211 | -0.924540 | 0.281698  | H | -3.813341 | 0.822121  | -0.503540 |
|                 |           |           |                               | H | -1.245842 | -2.524174 | 0.395375  |   |           |           |           |
|                 |           |           |                               | H | -1.316602 | -1.722691 | -1.160049 |   |           |           |           |
|                 |           |           |                               | H | -2.878431 | 0.383819  | -1.414777 |   |           |           |           |
|                 |           |           |                               | H | -3.792450 | 0.915053  | -0.020205 |   |           |           |           |
|                 |           |           |                               | H | -2.783793 | -0.854130 | 1.369732  |   |           |           |           |
|                 |           |           |                               | H | -3.513497 | -1.568650 | -0.051032 |   |           |           |           |
